# Supplementary material for: Transcriptional knockout of steroidogenic factor 1 in vivo in Oreochromis niloticus increased weight and suppressed gonad development using antisense RNA
Source: Research Square preprint supplement (doi:10.21203/rs.3.rs-138053/v1), 2021-01-04
Supplement: Supplementary file 1 [file 388699c75aa654038cea4eca.docx]

Tables 1Sequences of primers used to amplify differentially expressed mRNAs.

| Gene abbreviation | Sequence |
| --- | --- |
| col1a1b | F:5’- GGTGCTCCAGACCAAGAGTT -3’ |
| R:5’- AGCAACGGCCAAATGGAAAC -3’ |
| col1a1a | F:5’- ATGGTGGTCGTGCTTCACAA -3’ |
| R:5’- AGAAGGGTTGTGCGAGATGG -3’ |
| ctsd | F:5’- AAAGAGCAGTGAACGGAGGG -3’ |
| R:5’- CGGGGAAAGGAATCGAGGAG -3’ |
| ugt1ab | F:5’- TGACGTGTTCCTCAAACCCC -3’ |
| R:5’- CATGGAAGCCCACGAAGGAA -3’ |
| cyp4f3 | F:5’- CTTCGTGTTGTTGTGGCGTT -3’ |
| R:5’- TCATCTGACCGCTCCTGCTA -3’ |
| fn1b | F:5’- TTGGTAGCGAACACGCTGAT -3’ |
| R:5’- TGAGTCCAACCCGAACACAG -3’ |
| aldh1b2 | F:5’- CTGTACCCATGACAACCCCC -3’ |
| R:5’- GGTGTTTTGCCGGTTTCCAG -3’ |
| hsd11b2 | F:5’- TCACAGCTAAGTCGAGGCAC -3’ |
| R:5’- TCAGCAGGTGCGTTCTCATT -3’ |
| ephx2 | F:5’- CACAGGTCGCCTTCTCTCTC -3’ |
| R:5’- TTCTCCAGAGCAACGTCCAG -3’ |
| fndc1 | F:5’- GTGGGTCTAGGCTTCCCCTA -3’ |
| R:5’- TAGAGTGGGAGTTGCCTCCA -3’ |
| capn12 | F:5’- ACGCCAGCATAAACTCTCCC -3’ |
| R:5’- ATCTTTGACCCCTCGCAGTG -3’ |
| atp1a3b | F:5’- CTGTACCCATGACAACCCCC -3’ |
| R:5’- GGTGTTTTGCCGGTTTCCAG -3’ |
| cyp3a65 | F:5’- TTCACCAACCGCAGGGATAC -3’ |
| R:5’- TTCTGCATAGCGAGCAACGA -3’ |
| ugt5a1 | F:5’- TTGGACAACATCTCCCACCC -3’ |
| R:5’- AAGACCGAGGAAAACGAGCA -3’ |
| *β*-action | F:5’- CCACACAGTGCCCATCTACGA-3’ |
| R:5’- CCACGCTCTGTCAGGATCTTCA -3’ |
