# Supplementary material for: Transcriptional knockout of steroidogenic factor 1 in vivo in Oreochromis niloticus increased weight and suppressed gonad development using antisense RNA
Source: Research Square preprint supplement (doi:10.21203/rs.3.rs-138053/v1), 2021-01-04
Supplement: Supplementary file 4 [file fe6404fe6adcf661e78b1afe.xlsx]

## Sheet: Sheet1
# Correlation	mRNA_Information						protein_Information						GO			KEGG
# mRNA : Gene : Protein	mRNA	FC(TF/CF)	Sig_FC	Regulation	pvalue	Sig_pvalue	protein	FC(TF/CF)	Sig_FC	Regulation	pvalue	Sig_pvalue	GO_list	GO_term	GO_class	KEGG_list	KEGG_term	KEGG_class
ENSONIG00000019628 : ENSONIG00000019628 : ENSONIP00000024712.1	ENSONIG00000019628	0.85816	no	down	0.237734	no	ENSONIP00000024712.1	0.904157	no	down	0.197582	no	GO:0006886;GO:0016021;GO:0016192;GO:0012505	intracellular protein transport;integral to membrane;vesicle-mediated transport;endomembrane system	biological_process;cellular_component;biological_process;cellular_component	ko04130	SNARE interactions in vesicular transport	Genetic Information Processing
ENSONIG00000009532 : ENSONIG00000009532 : ENSONIP00000056262.1	ENSONIG00000009532	1.41069	no	up	3.43895e-05	yes	ENSONIP00000056262.1	1.01072	no	up	0.693824	no	.	.	.	.	.	.
ENSONIG00000004672 : ENSONIG00000004672 : ENSONIP00000077773.1	ENSONIG00000004672	1.41346	no	up	4.66962e-06	yes	ENSONIP00000077773.1	0.870907	no	down	0.17864	no	GO:0008233	peptidase activity	molecular_function	.	.	.
ENSONIG00000007253 : ENSONIG00000007253 : ENSONIP00000009146.2	ENSONIG00000007253	1.55495	no	up	0.224393	no	ENSONIP00000009146.2	0.978892	no	down	0.699489	no	GO:0016021;GO:0007155;GO:0005886	integral to membrane;cell adhesion;plasma membrane	cellular_component;biological_process;cellular_component	ko04514;ko05020	Cell adhesion molecules (CAMs;Prion diseases	Environmental Information Processing;Human Diseases
ENSONIG00000010226 : ENSONIG00000010226 : ENSONIP00000012855.1	ENSONIG00000010226	0.01448	yes	down	5.015e-110	yes	ENSONIP00000012855.1	0.874414	no	down	0.0150515	yes	GO:0003746;GO:0005737;GO:0005525;GO:0003924	translation elongation factor activity;cytoplasm;GTP binding;GTPase activity	molecular_function;cellular_component;molecular_function;molecular_function	.	.	.
ENSONIG00000011561 : ENSONIG00000011561 : ENSONIP00000014561.2	ENSONIG00000011561	1.49345	no	up	1.43895e-10	yes	ENSONIP00000014561.2	1.02875	no	up	0.342724	no	GO:0018027;GO:0005634;GO:0006351;GO:0018026;GO:0006355;GO:0005694;GO:0018024	peptidyl-lysine dimethylation;nucleus;transcription, DNA-dependent;peptidyl-lysine monomethylation;regulation of transcription, DNA-dependent;chromosome;histone-lysine N-methyltransferase activity	biological_process;cellular_component;biological_process;biological_process;biological_process;cellular_component;molecular_function	ko00310	Lysine degradation	Metabolism
ENSONIG00000002969 : ENSONIG00000002969 : ENSONIP00000061359.1	ENSONIG00000002969	1.13337	no	up	0.00922217	yes	ENSONIP00000061359.1	1.02634	no	up	0.300416	no	GO:0000236;GO:0005515;GO:0008565;GO:0005635;GO:0030529;GO:0005642;GO:0015030;GO:0051028;GO:0019058;GO:0006886;GO:0000776;GO:0016071;GO:0005730;GO:0005829;GO:0003723	mitotic prometaphase;protein binding;protein transporter activity;nuclear envelope;ribonucleoprotein complex;annulate lamellae;Cajal body;mRNA transport;viral infectious cycle;intracellular protein transport;kinetochore;mRNA metabolic process;nucleolus;cytosol;RNA binding	biological_process;molecular_function;molecular_function;cellular_component;cellular_component;cellular_component;cellular_component;biological_process;biological_process;biological_process;cellular_component;biological_process;cellular_component;cellular_component;molecular_function	.	.	.
ENSONIG00000005407 : ENSONIG00000005407 : ENSONIP00000006795.2	ENSONIG00000005407	0.918413	no	down	0.569776	no	ENSONIP00000006795.2	0.983146	no	down	0.431763	no	GO:0015629;GO:0005925;GO:0017124;GO:0031527;GO:0034329;GO:0003779;GO:0005829;GO:0031258;GO:0005522;GO:0050852;GO:0007411	actin cytoskeleton;focal adhesion;SH3 domain binding;filopodium membrane;cell junction assembly;actin binding;cytosol;lamellipodium membrane;profilin binding;T cell receptor signaling pathway;axon guidance	cellular_component;cellular_component;molecular_function;cellular_component;biological_process;molecular_function;cellular_component;cellular_component;molecular_function;biological_process;biological_process	ko04510;ko04666;ko04670	Focal adhesion;Fc gamma R-mediated phagocytosis;Leukocyte transendothelial migration	Cellular Processes;Organismal Systems;Organismal Systems
ENSONIG00000015367 : ENSONIG00000015367 : ENSONIP00000046353.1	ENSONIG00000015367	1	no	down	1	no	ENSONIP00000046353.1	1.34101	yes	up	0.0111244	yes	GO:0005634;GO:0003924;GO:0005525	nucleus;GTPase activity;GTP binding	cellular_component;molecular_function;molecular_function	.	.	.
ENSONIG00000000379 : ENSONIG00000000379 : ENSONIP00000000479.2	ENSONIG00000000379	0.776385	no	down	0.137249	no	ENSONIP00000000479.2	0.941424	no	down	0.249584	no	GO:0030352;GO:0003993;GO:0005788;GO:0048015;GO:0030351;GO:0004446	inositol-1,4,5,6-tetrakisphosphate 6-phosphatase activity;acid phosphatase activity;endoplasmic reticulum lumen;phosphatidylinositol-mediated signaling;inositol-1,3,4,5,6-pentakisphosphate 3-phosphatase activity;inositol-hexakisphosphate phosphatase activity	molecular_function;molecular_function;cellular_component;biological_process;molecular_function;molecular_function	ko00562	Inositol phosphate metabolism	Metabolism
ENSONIG00000001203 : ENSONIG00000001203 : ENSONIP00000001521.2	ENSONIG00000001203	0.42774	yes	down	4.17369e-32	yes	ENSONIP00000001521.2	0.893939	no	down	0.138521	no	GO:0046872;GO:0004687;GO:0016020;GO:0005524;GO:0005516;GO:0005829	metal ion binding;myosin light chain kinase activity;membrane;ATP binding;calmodulin binding;cytosol	molecular_function;molecular_function;cellular_component;molecular_function;molecular_function;cellular_component	ko04020;ko04270;ko04810;ko04510	Calcium signaling pathway;Vascular smooth muscle contraction;Regulation of actin cytoskeleton;Focal adhesion	Environmental Information Processing;Organismal Systems;Cellular Processes;Cellular Processes
ENSONIG00000018400 : ENSONIG00000018400 : ENSONIP00000023166.2	ENSONIG00000018400	0.871947	no	down	0.210065	no	ENSONIP00000023166.2	0.892148	no	down	0.0286061	yes	GO:0003743;GO:0005515;GO:0006417;GO:0005845;GO:0005737	translation initiation factor activity;protein binding;regulation of translation;mRNA cap binding complex;cytoplasm	molecular_function;molecular_function;biological_process;cellular_component;cellular_component	ko04910;ko04150	Insulin signaling pathway;mTOR signaling pathway	Organismal Systems;Environmental Information Processing
ENSONIG00000004932 : ENSONIG00000004932 : ENSONIP00000006200.1	ENSONIG00000004932	1	no	down	1	no	ENSONIP00000006200.1	1.16884	no	up	0.0303836	yes	GO:0004252;GO:0006508;GO:0006957;GO:0005576	serine-type endopeptidase activity;proteolysis;complement activation, alternative pathway;extracellular region	molecular_function;biological_process;biological_process;cellular_component	ko04610	Complement and coagulation cascades	Organismal Systems
ENSONIG00000018435 : ENSONIG00000018435 : ENSONIP00000023210.1	ENSONIG00000018435	0.858147	no	down	0.306873	no	ENSONIP00000023210.1	0.873829	no	down	0.0215052	yes	.	.	.	ko05014	Amyotrophic lateral sclerosis (ALS	Human Diseases
ENSONIG00000015706 : ENSONIG00000015706 : ENSONIP00000019766.1	ENSONIG00000015706	0.911222	no	down	0.620456	no	ENSONIP00000019766.1	0.901141	no	down	0.0776816	no	GO:0006825;GO:0016531;GO:0005758	copper ion transport;copper chaperone activity;mitochondrial intermembrane space	biological_process;molecular_function;cellular_component	ko00190	Oxidative phosphorylation	Metabolism
ENSONIG00000000430 : ENSONIG00000000430 : ENSONIP00000000546.2	ENSONIG00000000430	0.974505	no	down	0.644444	no	ENSONIP00000000546.2	1.002	no	up	0.973356	no	GO:0005739;GO:0030170;GO:0016491;GO:0030151	mitochondrion;pyridoxal phosphate binding;oxidoreductase activity;molybdenum ion binding	cellular_component;molecular_function;molecular_function;molecular_function	.	.	.
ENSONIG00000013586 : ENSONIG00000013586 : ENSONIP00000041724.1	ENSONIG00000013586	0.868924	no	down	0.152581	no	ENSONIP00000041724.1	0.98314	no	down	0.681659	no	GO:0004252;GO:0070008;GO:0005634	serine-type endopeptidase activity;serine-type exopeptidase activity;nucleus	molecular_function;molecular_function;cellular_component	.	.	.
ENSONIG00000004766 : ENSONIG00000004766 : ENSONIP00000005997.2	ENSONIG00000004766	1.12282	no	up	0.00408559	yes	ENSONIP00000005997.2	0.922461	no	down	0.199373	no	GO:0006457;GO:0005528;GO:0003755;GO:0006915;GO:0030176;GO:0031966	protein folding;FK506 binding;peptidyl-prolyl cis-trans isomerase activity;apoptosis;integral to endoplasmic reticulum membrane;mitochondrial membrane	biological_process;molecular_function;molecular_function;biological_process;cellular_component;cellular_component	.	.	.
ENSONIG00000019226 : ENSONIG00000019226 : ENSONIP00000024199.2	ENSONIG00000019226	1.07705	no	up	0.0110094	yes	ENSONIP00000024199.2	1.09462	no	up	0.112536	no	GO:0004029;GO:0005737	aldehyde dehydrogenase (NAD) activity;cytoplasm	molecular_function;cellular_component	ko00640;ko00010;ko00650;ko00071;ko00340;ko00280;ko00330;ko00561;ko00410;ko00620;ko00053;ko00380;ko00310;ko00903	Propanoate metabolism;Glycolysis / Gluconeogenesis;Butanoate metabolism;Fatty acid metabolism;Histidine metabolism;Valine, leucine and isoleucine degradation;Arginine and proline metabolism;Glycerolipid metabolism;beta-Alanine metabolism;Pyruvate metabolism;Ascorbate and aldarate metabolism;Tryptophan metabolism;Lysine degradation;Limonene and pinene degradation	Metabolism;Metabolism;Metabolism;Metabolism;Metabolism;Metabolism;Metabolism;Metabolism;Metabolism;Metabolism;Metabolism;Metabolism;Metabolism;Metabolism
ENSONIG00000004841 : ENSONIG00000004841 : ENSONIP00000052216.1	ENSONIG00000004841	1.0453	no	up	0.171059	no	ENSONIP00000052216.1	0.905972	no	down	0.0769567	no	GO:0016255;GO:0042765;GO:0006501;GO:0005515	attachment of GPI anchor to protein;GPI-anchor transamidase complex;C-terminal protein lipidation;protein binding	biological_process;cellular_component;biological_process;molecular_function	ko00563	Glycosylphosphatidylinositol(GPI	Metabolism
ENSONIG00000014982 : ENSONIG00000014982 : ENSONIP00000074329.1	ENSONIG00000014982	0.606412	no	down	4.26558e-10	yes	ENSONIP00000074329.1	1.04918	no	up	0.535937	no	GO:0042470;GO:0008305;GO:0007229;GO:0044419;GO:0004872	melanosome;integrin complex;integrin-mediated signaling pathway;interspecies interaction between organisms;receptor activity	cellular_component;cellular_component;biological_process;biological_process;molecular_function	ko05130;ko05410;ko04145;ko04360;ko05222;ko04512;ko05131;ko05200;ko05140;ko05414;ko04510;ko05412;ko04670;ko05100;ko04810;ko04514	Pathogenic Escherichia coli infection;Hypertrophic cardiomyopathy (HCM;Phagosome;Axon guidance;Small cell lung cancer;ECM-receptor interaction;Shigellosis;Pathways in cancer;Leishmaniasis;Dilated cardiomyopathy;Focal adhesion;Arrhythmogenic right ventricular cardiomyopathy (ARVC;Leukocyte transendothelial migration;Bacterial invasion of epithelial cells;Regulation of actin cytoskeleton;Cell adhes…	Human Diseases;Human Diseases;Cellular Processes;Organismal Systems;Human Diseases;Environmental Information Processing;Human Diseases;Human Diseases;Human Diseases;Human Diseases;Cellular Processes;Human Diseases;Organismal Systems;Human Diseases;Cellular Processes;Environmental Information Processing
ENSONIG00000013698 : ENSONIG00000013698 : ENSONIP00000060937.1	ENSONIG00000013698	1.07463	no	up	0.649725	no	ENSONIP00000060937.1	0.890359	no	down	0.231788	no	GO:0005516;GO:0003779;GO:0016459;GO:0005524;GO:0003774	calmodulin binding;actin binding;myosin complex;ATP binding;motor activity	molecular_function;molecular_function;cellular_component;molecular_function;molecular_function	.	.	.
ENSONIG00000003217 : ENSONIG00000003217 : ENSONIP00000004036.2	ENSONIG00000003217	0.438222	yes	down	3.75868e-07	yes	ENSONIP00000004036.2	1.02497	no	up	0.461616	no	GO:0005737;GO:0005200;GO:0005885;GO:0003779;GO:0030833;GO:0006928	cytoplasm;structural constituent of cytoskeleton;Arp2/3 protein complex;actin binding;regulation of actin filament polymerization;cellular component movement	cellular_component;molecular_function;cellular_component;molecular_function;biological_process;biological_process	ko05130;ko05100;ko04666;ko04810;ko05131	Pathogenic Escherichia coli infection;Bacterial invasion of epithelial cells;Fc gamma R-mediated phagocytosis;Regulation of actin cytoskeleton;Shigellosis	Human Diseases;Human Diseases;Organismal Systems;Cellular Processes;Human Diseases
ENSONIG00000005588 : ENSONIG00000005588 : ENSONIP00000007028.1	ENSONIG00000005588	0.734978	no	down	1.56381e-05	yes	ENSONIP00000007028.1	1.02634	no	up	0.502785	no	GO:0015031;GO:0005769;GO:0005515;GO:0008270	protein transport;early endosome;protein binding;zinc ion binding	biological_process;cellular_component;molecular_function;molecular_function	.	.	.
ENSONIG00000018930 : ENSONIG00000018930 : ENSONIP00000043030.1	ENSONIG00000018930	1.05972	no	up	0.0828899	no	ENSONIP00000043030.1	0.977258	no	down	0.231933	no	GO:0000132;GO:0005783;GO:0043234;GO:0005770;GO:0007030;GO:0048487;GO:0006915;GO:0006890;GO:0048513;GO:0030425;GO:0005794;GO:0005776;GO:0034452;GO:0047496;GO:0005829;GO:0002039;GO:0030424;GO:0008134;GO:0045505;GO:0005624;GO:0005634;GO:0030659	establishment of mitotic spindle orientation;endoplasmic reticulum;protein complex;late endosome;Golgi organization;beta-tubulin binding;apoptosis;retrograde vesicle-mediated transport, Golgi to ER;organ development;dendrite;Golgi apparatus;autophagic vacuole;dynactin binding;vesicle transport along microtubule;cytosol;p53 binding;axon;transcription factor binding;dynein intermediate chain bindin…	biological_process;cellular_component;cellular_component;cellular_component;biological_process;molecular_function;biological_process;biological_process;biological_process;cellular_component;cellular_component;cellular_component;molecular_function;biological_process;cellular_component;molecular_function;cellular_component;molecular_function;molecular_function;cellular_component;cellular_component;…	ko05016	Huntington's disease	Human Diseases
ENSONIG00000013219 : ENSONIG00000013219 : ENSONIP00000016625.2	ENSONIG00000013219	0.915029	no	down	0.659984	no	ENSONIP00000016625.2	0.951545	no	down	0.705555	no	GO:0009231;GO:0046872;GO:0008531;GO:0005829;GO:0005524	riboflavin biosynthetic process;metal ion binding;riboflavin kinase activity;cytosol;ATP binding	biological_process;molecular_function;molecular_function;cellular_component;molecular_function	ko00740	Riboflavin metabolism	Metabolism
ENSONIG00000008379 : ENSONIG00000008379 : ENSONIP00000058182.1	ENSONIG00000008379	0.829724	no	down	0.186227	no	ENSONIP00000058182.1	0.946788	no	down	0.689868	no	GO:0030168;GO:0001525;GO:0031295;GO:0016303;GO:0008286;GO:0050852;GO:0050900;GO:0007173;GO:0008543;GO:0048011;GO:0046934;GO:0048015;GO:0005524;GO:0004674	platelet activation;angiogenesis;T cell costimulation;1-phosphatidylinositol-3-kinase activity;insulin receptor signaling pathway;T cell receptor signaling pathway;leukocyte migration;epidermal growth factor receptor signaling pathway;fibroblast growth factor receptor signaling pathway;nerve growth factor receptor signaling pathway;phosphatidylinositol-4,5-bisphosphate 3-kinase activity;phosphati…	biological_process;biological_process;biological_process;molecular_function;biological_process;biological_process;biological_process;biological_process;biological_process;biological_process;molecular_function;biological_process;molecular_function;molecular_function	ko04666;ko05221;ko05214;ko04210;ko04510;ko04012;ko04150;ko04370;ko05220;ko05213;ko04910;ko04620;ko05142;ko00562;ko04664;ko05222;ko04810;ko05210;ko05215;ko04722;ko04070;ko05100;ko04670;ko05223;ko05211;ko04914;ko04660;ko04930;ko04960;ko05200;ko04630;ko05218;ko05212;ko04650;ko04662;ko04062	Fc gamma R-mediated phagocytosis;Acute myeloid leukemia;Glioma;Apoptosis;Focal adhesion;ErbB signaling pathway;mTOR signaling pathway;VEGF signaling pathway;Chronic myeloid leukemia;Endometrial cancer;Insulin signaling pathway;Toll-like receptor signaling pathway;Chagas disease;Inositol phosphate metabolism;Fc epsilon RI signaling pathway;Small cell lung cancer;Regulation of actin cytoskeleton;Co…	Organismal Systems;Human Diseases;Human Diseases;Cellular Processes;Cellular Processes;Environmental Information Processing;Environmental Information Processing;Environmental Information Processing;Human Diseases;Human Diseases;Organismal Systems;Organismal Systems;Human Diseases;Metabolism;Organismal Systems;Human Diseases;Cellular Processes;Human Diseases;Human Diseases;Organismal Systems;Envir…
ENSONIG00000001597 : ENSONIG00000001597 : ENSONIP00000002002.2	ENSONIG00000001597	0.66243	no	down	0.00691103	yes	ENSONIP00000002002.2	1.27531	yes	up	0.00787157	yes	GO:0005608;GO:0072249;GO:0005178;GO:0007601;GO:0007155;GO:0019717;GO:0060041;GO:0072274;GO:0007528;GO:0014044;GO:0048677;GO:0014002;GO:0005604	laminin-3 complex;metanephric glomerular visceral epithelial cell development;integrin binding;visual perception;cell adhesion;synaptosome;retina development in camera-type eye;metanephric glomerular basement membrane development;neuromuscular junction development;Schwann cell development;axon extension involved in regeneration;astrocyte development;basement membrane	cellular_component;biological_process;molecular_function;biological_process;biological_process;cellular_component;biological_process;biological_process;biological_process;biological_process;biological_process;biological_process;cellular_component	ko04510;ko04512;ko05200;ko05222	Focal adhesion;ECM-receptor interaction;Pathways in cancer;Small cell lung cancer	Cellular Processes;Environmental Information Processing;Human Diseases;Human Diseases
ENSONIG00000007988 : ENSONIG00000007988 : ENSONIP00000010059.2	ENSONIG00000007988	1.03284	no	up	0.488582	no	ENSONIP00000010059.2	0.960784	no	down	0.385731	no	GO:0005840;GO:0006412;GO:0003735	ribosome;translation;structural constituent of ribosome	cellular_component;biological_process;molecular_function	ko03010	Ribosome	Genetic Information Processing
ENSONIG00000011481 : ENSONIG00000011481 : ENSONIP00000072484.1	ENSONIG00000011481	0.946767	no	down	0.950413	no	ENSONIP00000072484.1	0.998668	no	down	0.927254	no	GO:0005737;GO:0003676;GO:0031047;GO:0016442;GO:0004518	cytoplasm;nucleic acid binding;gene silencing by RNA;RNA-induced silencing complex;nuclease activity	cellular_component;molecular_function;biological_process;cellular_component;molecular_function	.	.	.
ENSONIG00000016279 : ENSONIG00000016279 : ENSONIP00000020495.1	ENSONIG00000016279	1.43363	no	up	1.77411e-08	yes	ENSONIP00000020495.1	0.85128	no	down	0.0282607	yes	GO:0031901;GO:0007032;GO:0005886;GO:0042470;GO:0030100;GO:0015031;GO:0005525;GO:0003924;GO:0030139;GO:0007264	early endosome membrane;endosome organization;plasma membrane;melanosome;regulation of endocytosis;protein transport;GTP binding;GTPase activity;endocytic vesicle;small GTPase mediated signal transduction	cellular_component;biological_process;cellular_component;cellular_component;biological_process;biological_process;molecular_function;molecular_function;cellular_component;biological_process	ko04144;ko04145;ko04962	Endocytosis;Phagosome;Vasopressin-regulated water reabsorption	Cellular Processes;Cellular Processes;Organismal Systems
ENSONIG00000008236 : ENSONIG00000008236 : ENSONIP00000010367.2	ENSONIG00000008236	1.39504	no	up	9.43316e-09	yes	ENSONIP00000010367.2	0.983471	no	down	0.591099	no	GO:0008890;GO:0006520;GO:0030170;GO:0009058;GO:0016769	glycine C-acetyltransferase activity;cellular amino acid metabolic process;pyridoxal phosphate binding;biosynthetic process;transferase activity, transferring nitrogenous groups	molecular_function;biological_process;molecular_function;biological_process;molecular_function	ko00260	Glycine, serine and threonine metabolism	Metabolism
ENSONIG00000002805 : ENSONIG00000002805 : ENSONIP00000003517.2	ENSONIG00000002805	1.06228	no	up	0.0345797	yes	ENSONIP00000003517.2	0.901743	no	down	0.158226	no	GO:0016020;GO:0004063;GO:0046872;GO:0004064;GO:0005576	membrane;aryldialkylphosphatase activity;metal ion binding;arylesterase activity;extracellular region	cellular_component;molecular_function;molecular_function;molecular_function;cellular_component	ko00361	gamma-Hexachlorocyclohexane degradation	Metabolism
ENSONIG00000012833 : ENSONIG00000012833 : ENSONIP00000016150.2	ENSONIG00000012833	0.981691	no	down	0.563626	no	ENSONIP00000016150.2	0.91022	no	down	0.0616351	no	GO:0005794;GO:0034498;GO:0008565;GO:0035091;GO:0005515;GO:0031901;GO:0006897;GO:0007154;GO:0006886	Golgi apparatus;early endosome to Golgi transport;protein transporter activity;phosphatidylinositol binding;protein binding;early endosome membrane;endocytosis;cell communication;intracellular protein transport	cellular_component;biological_process;molecular_function;molecular_function;molecular_function;cellular_component;biological_process;biological_process;biological_process	.	.	.
ENSONIG00000014010 : ENSONIG00000014010 : ENSONIP00000027162.1	ENSONIG00000014010	1.19262	no	up	0.00787286	yes	ENSONIP00000027162.1	0.888889	no	down	0.139353	no	GO:0005524;GO:0004674	ATP binding;protein serine/threonine kinase activity	molecular_function;molecular_function	.	.	.
ENSONIG00000003539 : ENSONIG00000003539 : ENSONIP00000038058.1	ENSONIG00000003539	0.713056	no	down	0.000160727	yes	ENSONIP00000038058.1	0.949951	no	down	0.0438229	yes	GO:0006436;GO:0005524;GO:0005737;GO:0004830	tryptophanyl-tRNA aminoacylation;ATP binding;cytoplasm;tryptophan-tRNA ligase activity	biological_process;molecular_function;cellular_component;molecular_function	ko00970;ko00380	Aminoacyl-tRNA biosynthesis;Tryptophan metabolism	Genetic Information Processing;Metabolism
ENSONIG00000006148 : ENSONIG00000006148 : ENSONIP00000007742.2	ENSONIG00000006148	0.965964	no	down	1	no	ENSONIP00000007742.2	1.09059	no	up	0.646309	no	GO:0007275;GO:0000122;GO:0051216;GO:0042692;GO:0046982;GO:0035051;GO:0006355;GO:0021778;GO:0001701;GO:0032332;GO:0000902;GO:0005634;GO:0003700;GO:0043565;GO:0048821;GO:0006351;GO:0009791;GO:0005667;GO:0045893;GO:0044212;GO:0016458;GO:0003677	multicellular organismal development;negative regulation of transcription from RNA polymerase II promoter;cartilage development;muscle cell differentiation;protein heterodimerization activity;cardiac cell differentiation;regulation of transcription, DNA-dependent;oligodendrocyte cell fate specification;in utero embryonic development;positive regulation of chondrocyte differentiation;cell morphoge…	biological_process;biological_process;biological_process;biological_process;molecular_function;biological_process;biological_process;biological_process;biological_process;biological_process;biological_process;cellular_component;molecular_function;molecular_function;biological_process;biological_process;biological_process;cellular_component;biological_process;molecular_function;biological_process;…	.	.	.
ENSONIG00000007321 : ENSONIG00000007321 : ENSONIP00000046350.1	ENSONIG00000007321	1.06143	no	up	0.105075	no	ENSONIP00000046350.1	0.888889	no	down	0.0302999	yes	GO:0006810;GO:0016021;GO:0005743	transport;integral to membrane;mitochondrial inner membrane	biological_process;cellular_component;cellular_component	.	.	.
ENSONIG00000007229 : ENSONIG00000007229 : ENSONIP00000009114.2	ENSONIG00000007229	1.107	no	up	0.0114036	yes	ENSONIP00000009114.2	0.87766	no	down	0.0202836	yes	GO:0006810;GO:0022900	transport;electron transport chain	biological_process;biological_process	ko05016;ko05010;ko05012;ko00190	Huntington's disease;Alzheimer's disease;Parkinson's disease;Oxidative phosphorylation	Human Diseases;Human Diseases;Human Diseases;Metabolism
ENSONIG00000008830 : ENSONIG00000008830 : ENSONIP00000011104.2	ENSONIG00000008830	0.792873	no	down	0.00811438	yes	ENSONIP00000011104.2	1.02191	no	up	0.721251	no	GO:0004831;GO:0070184;GO:0072545;GO:0000049;GO:0005759;GO:0005524;GO:0042803	tyrosine-tRNA ligase activity;mitochondrial tyrosyl-tRNA aminoacylation;tyrosine binding;tRNA binding;mitochondrial matrix;ATP binding;protein homodimerization activity	molecular_function;biological_process;molecular_function;molecular_function;cellular_component;molecular_function;molecular_function	ko00970	Aminoacyl-tRNA biosynthesis	Genetic Information Processing
ENSONIG00000006366 : ENSONIG00000006366 : ENSONIP00000008023.2	ENSONIG00000006366	3.21461	yes	up	1.88259e-23	yes	ENSONIP00000008023.2	1.36539	yes	up	0.0102134	yes	GO:0005201;GO:0005581	extracellular matrix structural constituent;collagen	molecular_function;cellular_component	ko04510;ko04512	Focal adhesion;ECM-receptor interaction	Cellular Processes;Environmental Information Processing
ENSONIG00000015804 : ENSONIG00000015804 : ENSONIP00000019895.2	ENSONIG00000015804	1.08692	no	up	0.0631759	no	ENSONIP00000019895.2	0.965924	no	down	0.528218	no	.	.	.	ko05416;ko04530;ko05014;ko04740;ko04744	Viral myocarditis;Tight junction;Amyotrophic lateral sclerosis (ALS;Olfactory transduction;Phototransduction	Human Diseases;Cellular Processes;Human Diseases;Organismal Systems;Organismal Systems
ENSONIG00000010914 : ENSONIG00000010914 : ENSONIP00000030110.1	ENSONIG00000010914	1.05578	no	up	0.0608192	no	ENSONIP00000030110.1	0.974013	no	down	0.446828	no	GO:0003899;GO:0003677;GO:0046983;GO:0005665	DNA-directed RNA polymerase activity;DNA binding;protein dimerization activity;DNA-directed RNA polymerase II, core complex	molecular_function;molecular_function;molecular_function;cellular_component	ko05016;ko03020;ko00240;ko00230	Huntington's disease;RNA polymerase;Pyrimidine metabolism;Purine metabolism	Human Diseases;Genetic Information Processing;Metabolism;Metabolism
ENSONIG00000014653 : ENSONIG00000014653 : ENSONIP00000048746.1	ENSONIG00000014653	1.18503	no	up	0.000212299	yes	ENSONIP00000048746.1	0.948993	no	down	0.0496985	yes	GO:0007155;GO:0005886	cell adhesion;plasma membrane	biological_process;cellular_component	ko04530;ko05416	Tight junction;Viral myocarditis	Cellular Processes;Human Diseases
ENSONIG00000001642 : ENSONIG00000001642 : ENSONIP00000002061.1	ENSONIG00000001642	0.22113	yes	down	5.2347e-05	yes	ENSONIP00000002061.1	0.793423	yes	down	0.289783	no	GO:0005488;GO:0052650;GO:0004303;GO:0005737;GO:0007601;GO:0050896;GO:0006703;GO:0016021	binding;NADP-retinol dehydrogenase activity;estradiol 17-beta-dehydrogenase activity;cytoplasm;visual perception;response to stimulus;estrogen biosynthetic process;integral to membrane	molecular_function;molecular_function;molecular_function;cellular_component;biological_process;biological_process;biological_process;cellular_component	ko00830	Retinol metabolism	Metabolism
ENSONIG00000012574 : ENSONIG00000012574 : ENSONIP00000073370.1	ENSONIG00000012574	1.34619	no	up	6.08131e-07	yes	ENSONIP00000073370.1	0.987744	no	down	0.883623	no	GO:0015991;GO:0005886;GO:0046961;GO:0042470;GO:0005829;GO:0046933;GO:0005524;GO:0033180	ATP hydrolysis coupled proton transport;plasma membrane;proton-transporting ATPase activity, rotational mechanism;melanosome;cytosol;hydrogen ion transporting ATP synthase activity, rotational mechanism;ATP binding;proton-transporting V-type ATPase, V1 domain	biological_process;cellular_component;molecular_function;cellular_component;cellular_component;molecular_function;molecular_function;cellular_component	ko05110;ko04966;ko05120;ko04145;ko00190	Vibrio cholerae infection;Collecting duct acid secretion;Epithelial cell signaling in Helicobacter pylori infection;Phagosome;Oxidative phosphorylation	Human Diseases;Organismal Systems;Human Diseases;Cellular Processes;Metabolism
ENSONIG00000011094 : ENSONIG00000011094 : ENSONIP00000047440.1	ENSONIG00000011094	0.611931	no	down	0.0278631	yes	ENSONIP00000047440.1	0.765225	yes	down	0.00662138	yes	GO:0035091;GO:0003676;GO:0008270;GO:0007154	phosphatidylinositol binding;nucleic acid binding;zinc ion binding;cell communication	molecular_function;molecular_function;molecular_function;biological_process	.	.	.
ENSONIG00000002305 : ENSONIG00000002305 : ENSONIP00000053667.1	ENSONIG00000002305	1.06713	no	up	0.0451256	yes	ENSONIP00000053667.1	0.797484	yes	down	0.259206	no	GO:0008380;GO:0006397	RNA splicing;mRNA processing	biological_process;biological_process	ko04120	Ubiquitin mediated proteolysis	Genetic Information Processing
ENSONIG00000020226 : ENSONIG00000020226 : ENSONIP00000066952.1	ENSONIG00000020226	0.851112	no	down	0.044069	yes	ENSONIP00000066952.1	0.831502	yes	down	0.00328904	yes	GO:0006897;GO:0005769;GO:0030426;GO:0003779;GO:0006457;GO:0030424	endocytosis;early endosome;growth cone;actin binding;protein folding;axon	biological_process;cellular_component;cellular_component;molecular_function;biological_process;cellular_component	ko05416;ko04530	Viral myocarditis;Tight junction	Human Diseases;Cellular Processes
ENSONIG00000001546 : ENSONIG00000001546 : ENSONIP00000072371.1	ENSONIG00000001546	0.911634	no	down	0.79133	no	ENSONIP00000072371.1	1.00033	no	up	0.996327	no	GO:0003714;GO:0000122;GO:0008134;GO:0043565;GO:0006351;GO:0005634	transcription corepressor activity;negative regulation of transcription from RNA polymerase II promoter;transcription factor binding;sequence-specific DNA binding;transcription, DNA-dependent;nucleus	molecular_function;biological_process;molecular_function;molecular_function;biological_process;cellular_component	.	.	.
ENSONIG00000003203 : ENSONIG00000003203 : ENSONIP00000004017.1	ENSONIG00000003203	0.896616	no	down	0.231927	no	ENSONIP00000004017.1	0.884422	no	down	0.052416	no	GO:0005765;GO:0005624;GO:0010008;GO:0005887	lysosomal membrane;membrane fraction;endosome membrane;integral to plasma membrane	cellular_component;cellular_component;cellular_component;cellular_component	ko04142;ko04145	Lysosome;Phagosome	Cellular Processes;Cellular Processes
ENSONIG00000012729 : ENSONIG00000012729 : ENSONIP00000058998.1	ENSONIG00000012729	0.871832	no	down	0.372086	no	ENSONIP00000058998.1	0.945832	no	down	0.122424	no	GO:0000932;GO:0004386;GO:0005524;GO:0008270;GO:0003677;GO:0003723;GO:0000184	cytoplasmic mRNA processing body;helicase activity;ATP binding;zinc ion binding;DNA binding;RNA binding;nuclear-transcribed mRNA catabolic process, nonsense-mediated decay	cellular_component;molecular_function;molecular_function;molecular_function;molecular_function;molecular_function;biological_process	.	.	.
ENSONIG00000002524 : ENSONIG00000002524 : ENSONIP00000003160.1	ENSONIG00000002524	1.01208	no	up	0.418885	no	ENSONIP00000003160.1	0.919066	no	down	0.0809606	no	GO:0005215;GO:0003677;GO:0015031;GO:0051028;GO:0005737;GO:0044419;GO:0055085;GO:0005643;GO:0005654;GO:0005730;GO:0016032;GO:0010827;GO:0005975;GO:0031965;GO:0015758	transporter activity;DNA binding;protein transport;mRNA transport;cytoplasm;interspecies interaction between organisms;transmembrane transport;nuclear pore;nucleoplasm;nucleolus;viral reproduction;regulation of glucose transport;carbohydrate metabolic process;nuclear membrane;glucose transport	molecular_function;molecular_function;biological_process;biological_process;cellular_component;biological_process;biological_process;cellular_component;cellular_component;cellular_component;biological_process;biological_process;biological_process;cellular_component;biological_process	.	.	.
ENSONIG00000019670 : ENSONIG00000019670 : ENSONIP00000079062.1	ENSONIG00000019670	1.11988	no	up	0.0113947	yes	ENSONIP00000079062.1	0.93299	no	down	0.129482	no	GO:0043169;GO:0005634;GO:0005975;GO:0004563;GO:0005737	cation binding;nucleus;carbohydrate metabolic process;beta-N-acetylhexosaminidase activity;cytoplasm	molecular_function;cellular_component;biological_process;molecular_function;cellular_component	.	.	.
ENSONIG00000011997 : ENSONIG00000011997 : ENSONIP00000015100.1	ENSONIG00000011997	1.005	no	up	0.360285	no	ENSONIP00000015100.1	0.89482	no	down	0.0415966	yes	GO:0005741;GO:0016021	mitochondrial outer membrane;integral to membrane	cellular_component;cellular_component	.	.	.
ENSONIG00000009329 : ENSONIG00000009329 : ENSONIP00000032048.1	ENSONIG00000009329	0.872638	no	down	0.213802	no	ENSONIP00000032048.1	0.945201	no	down	0.222048	no	.	.	.	.	.	.
ENSONIG00000013506 : ENSONIG00000013506 : ENSONIP00000016982.2	ENSONIG00000013506	1.22523	no	up	0.0532985	no	ENSONIP00000016982.2	0.836853	no	down	0.0692979	no	GO:0016021	integral to membrane	cellular_component	.	.	.
ENSONIG00000020098 : ENSONIG00000020098 : ENSONIP00000050304.1	ENSONIG00000020098	1.0088	no	up	0.347686	no	ENSONIP00000050304.1	0.918159	no	down	0.0581967	no	GO:0005759;GO:0008470;GO:0050660	mitochondrial matrix;isovaleryl-CoA dehydrogenase activity;flavin adenine dinucleotide binding	cellular_component;molecular_function;molecular_function	ko00280	Valine, leucine and isoleucine degradation	Metabolism
ENSONIG00000001018 : ENSONIG00000001018 : ENSONIP00000037752.1	ENSONIG00000001018	1.20392	no	up	0.133174	no	ENSONIP00000037752.1	0.982161	no	down	0.809823	no	GO:0046777;GO:0001666;GO:0005524;GO:0007399;GO:0005516;GO:0004683;GO:0033017;GO:0006979;GO:0048169;GO:0005954;GO:0030154	protein autophosphorylation;response to hypoxia;ATP binding;nervous system development;calmodulin binding;calmodulin-dependent protein kinase activity;sarcoplasmic reticulum membrane;response to oxidative stress;regulation of long-term neuronal synaptic plasticity;calcium- and calmodulin-dependent protein kinase complex;cell differentiation	biological_process;biological_process;molecular_function;biological_process;molecular_function;molecular_function;cellular_component;biological_process;biological_process;cellular_component;biological_process	ko05214;ko04722;ko04020;ko04310;ko04916;ko04912;ko04114;ko04745;ko04720;ko04740;ko04012	Glioma;Neurotrophin signaling pathway;Calcium signaling pathway;Wnt signaling pathway;Melanogenesis;GnRH signaling pathway;Oocyte meiosis;Phototransduction - fly;Long-term potentiation;Olfactory transduction;ErbB signaling pathway	Human Diseases;Organismal Systems;Environmental Information Processing;Environmental Information Processing;Organismal Systems;Organismal Systems;Cellular Processes;Organismal Systems;Organismal Systems;Organismal Systems;Environmental Information Processing
ENSONIG00000002062 : ENSONIG00000002062 : ENSONIP00000002574.1	ENSONIG00000002062	0.872294	no	down	0.159331	no	ENSONIP00000002574.1	1.02703	no	up	0.602513	no	GO:0071204;GO:0006351;GO:0008380;GO:0003723;GO:0006397;GO:0003677;GO:0006355;GO:0005737	histone pre-mRNA 3'end processing complex;transcription, DNA-dependent;RNA splicing;RNA binding;mRNA processing;DNA binding;regulation of transcription, DNA-dependent;cytoplasm	cellular_component;biological_process;biological_process;molecular_function;biological_process;molecular_function;biological_process;cellular_component	.	.	.
ENSONIG00000020234 : ENSONIG00000020234 : ENSONIP00000025495.2	ENSONIG00000020234	1.02768	no	up	0.66879	no	ENSONIP00000025495.2	0.958551	no	down	0.570122	no	GO:0009058;GO:0016853	biosynthetic process;isomerase activity	biological_process;molecular_function	.	.	.
ENSONIG00000015231 : ENSONIG00000015231 : ENSONIP00000019168.1	ENSONIG00000015231	0.809794	no	down	0.00312127	yes	ENSONIP00000019168.1	0.507665	yes	down	0.00494879	yes	GO:0005737;GO:0008289;GO:0005215	cytoplasm;lipid binding;transporter activity	cellular_component;molecular_function;molecular_function	ko03320	PPAR signaling pathway	Organismal Systems
ENSONIG00000001291 : ENSONIG00000001291 : ENSONIP00000029749.1	ENSONIG00000001291	0.926615	no	down	0.717563	no	ENSONIP00000029749.1	0.931745	no	down	0.196647	no	GO:0016021;GO:0005789;GO:0015031;GO:0016192;GO:0000139	integral to membrane;endoplasmic reticulum membrane;protein transport;vesicle-mediated transport;Golgi membrane	cellular_component;cellular_component;biological_process;biological_process;cellular_component	ko04130	SNARE interactions in vesicular transport	Genetic Information Processing
ENSONIG00000000778 : ENSONIG00000000778 : ENSONIP00000000986.1	ENSONIG00000000778	1.01452	no	up	0.842373	no	ENSONIP00000000986.1	0.939237	no	down	0.639978	no	GO:0005452;GO:0016021	inorganic anion exchanger activity;integral to membrane	molecular_function;cellular_component	ko04966	Collecting duct acid secretion	Organismal Systems
ENSONIG00000014077 : ENSONIG00000014077 : ENSONIP00000027970.1	ENSONIG00000014077	0.863747	no	down	0.129451	no	ENSONIP00000027970.1	0.92123	no	down	0.044879	yes	GO:0005789;GO:0046872;GO:0016021;GO:0006508;GO:0008237	endoplasmic reticulum membrane;metal ion binding;integral to membrane;proteolysis;metallopeptidase activity	cellular_component;molecular_function;cellular_component;biological_process;molecular_function	.	.	.
ENSONIG00000009280 : ENSONIG00000009280 : ENSONIP00000011670.2	ENSONIG00000009280	1.12024	no	up	0.000795562	yes	ENSONIP00000011670.2	0.922461	no	down	0.232752	no	GO:0005730;GO:0006364	nucleolus;rRNA processing	cellular_component;biological_process	ko00310	Lysine degradation	Metabolism
ENSONIG00000010520 : ENSONIG00000010520 : ENSONIP00000013224.2	ENSONIG00000010520	1.05315	no	up	0.43798	no	ENSONIP00000013224.2	0.970762	no	down	0.818192	no	GO:0005930;GO:0005794;GO:0042073	axoneme;Golgi apparatus;intraflagellar transport	cellular_component;cellular_component;biological_process	.	.	.
ENSONIG00000012581 : ENSONIG00000012581 : ENSONIP00000054068.1	ENSONIG00000012581	1.10542	no	up	0.451593	no	ENSONIP00000054068.1	1.01275	no	up	0.806724	no	GO:0017124;GO:0046847;GO:0008093;GO:0007165;GO:0005737	SH3 domain binding;filopodium assembly;cytoskeletal adaptor activity;signal transduction;cytoplasm	molecular_function;biological_process;molecular_function;biological_process;cellular_component	ko04144	Endocytosis	Cellular Processes
ENSONIG00000000923 : ENSONIG00000000923 : ENSONIP00000001167.2	ENSONIG00000000923	1.11288	no	up	0.0023952	yes	ENSONIP00000001167.2	0.903267	no	down	0.179101	no	GO:0006260;GO:0005743	DNA replication;mitochondrial inner membrane	biological_process;cellular_component	.	.	.
ENSONIG00000004372 : ENSONIG00000004372 : ENSONIP00000005505.1	ENSONIG00000004372	0.926567	no	down	0.853033	no	ENSONIP00000005505.1	1.10526	no	up	0.207719	no	GO:0008201;GO:0005576;GO:0006953;GO:0007155;GO:0008360	heparin binding;extracellular region;acute-phase response;cell adhesion;regulation of cell shape	molecular_function;cellular_component;biological_process;biological_process;biological_process	ko04510;ko04512;ko04810;ko05222;ko05200;ko05100	Focal adhesion;ECM-receptor interaction;Regulation of actin cytoskeleton;Small cell lung cancer;Pathways in cancer;Bacterial invasion of epithelial cells	Cellular Processes;Environmental Information Processing;Cellular Processes;Human Diseases;Human Diseases;Human Diseases
ENSONIG00000000617 : ENSONIG00000000617 : ENSONIP00000000784.1	ENSONIG00000000617	1.13654	no	up	0.00647695	yes	ENSONIP00000000784.1	0.879424	no	down	0.134275	no	.	.	.	.	.	.
ENSONIG00000016532 : ENSONIG00000016532 : ENSONIP00000030213.1	ENSONIG00000016532	1.03689	no	up	0.113969	no	ENSONIP00000030213.1	1.12014	no	up	0.429873	no	GO:0006915;GO:0016021;GO:0043066	apoptosis;integral to membrane;negative regulation of apoptosis	biological_process;cellular_component;biological_process	.	.	.
ENSONIG00000013743 : ENSONIG00000013743 : ENSONIP00000074722.1	ENSONIG00000013743	0.912914	no	down	0.461211	no	ENSONIP00000074722.1	0.666852	yes	down	0.00114348	yes	GO:0005741;GO:0006626;GO:0008308;GO:0046930;GO:0015288	mitochondrial outer membrane;protein targeting to mitochondrion;voltage-gated anion channel activity;pore complex;porin activity	cellular_component;biological_process;molecular_function;cellular_component;molecular_function	ko05014	Amyotrophic lateral sclerosis (ALS	Human Diseases
ENSONIG00000005784 : ENSONIG00000005784 : ENSONIP00000055250.1	ENSONIG00000005784	0.885718	no	down	0.40655	no	ENSONIP00000055250.1	0.908397	no	down	0.15025	no	GO:0046875;GO:0045211;GO:0061001;GO:0019717;GO:0031532;GO:0030054;GO:0005886;GO:0048013;GO:0050770;GO:0014069;GO:0005737;GO:0032861;GO:0005096	ephrin receptor binding;postsynaptic membrane;regulation of dendritic spine morphogenesis;synaptosome;actin cytoskeleton reorganization;cell junction;plasma membrane;ephrin receptor signaling pathway;regulation of axonogenesis;postsynaptic density;cytoplasm;activation of Rap GTPase activity;GTPase activator activity	molecular_function;cellular_component;biological_process;cellular_component;biological_process;cellular_component;cellular_component;biological_process;biological_process;cellular_component;cellular_component;biological_process;molecular_function	ko04670	Leukocyte transendothelial migration	Organismal Systems
ENSONIG00000018630 : ENSONIG00000018630 : ENSONIP00000078178.1	ENSONIG00000018630	0.114558	yes	down	2.49923e-24	yes	ENSONIP00000078178.1	1.00736	no	up	0.894464	no	GO:0055085;GO:0008565;GO:0016021;GO:0005789	transmembrane transport;protein transporter activity;integral to membrane;endoplasmic reticulum membrane	biological_process;molecular_function;cellular_component;cellular_component	ko03060	Protein export	Genetic Information Processing
ENSONIG00000005481 : ENSONIG00000005481 : ENSONIP00000063288.1	ENSONIG00000005481	0.375057	yes	down	1	no	ENSONIP00000063288.1	0.428912	yes	down	0.000183318	yes	GO:0006461;GO:0005578;GO:0005515;GO:0005201;GO:0005581;GO:0007155	protein complex assembly;proteinaceous extracellular matrix;protein binding;extracellular matrix structural constituent;collagen;cell adhesion	biological_process;cellular_component;molecular_function;molecular_function;cellular_component;biological_process	ko04512;ko04510	ECM-receptor interaction;Focal adhesion	Environmental Information Processing;Cellular Processes
ENSONIG00000018238 : ENSONIG00000018238 : ENSONIP00000022970.2	ENSONIG00000018238	1.30617	no	up	4.14269e-07	yes	ENSONIP00000022970.2	0.916001	no	down	0.346435	no	.	.	.	ko03050	Proteasome	Genetic Information Processing
ENSONIG00000010118 : ENSONIG00000010118 : ENSONIP00000012722.2	ENSONIG00000010118	1.35039	no	up	0.0371653	yes	ENSONIP00000012722.2	1.04012	no	up	0.370043	no	GO:0005509	calcium ion binding	molecular_function	.	.	.
ENSONIG00000003956 : ENSONIG00000003956 : ENSONIP00000004986.1	ENSONIG00000003956	1.16877	no	up	0.000762305	yes	ENSONIP00000004986.1	0.831756	yes	down	0.0103368	yes	GO:0051603;GO:0005839;GO:0005737;GO:0004298;GO:0005634	proteolysis involved in cellular protein catabolic process;proteasome core complex;cytoplasm;threonine-type endopeptidase activity;nucleus	biological_process;cellular_component;cellular_component;molecular_function;cellular_component	ko03050	Proteasome	Genetic Information Processing
ENSONIG00000007519 : ENSONIG00000007519 : ENSONIP00000009482.2	ENSONIG00000007519	1.24564	no	up	0.116105	no	ENSONIP00000009482.2	1.09609	no	up	0.0694208	no	GO:0015629;GO:0003779;GO:0048747;GO:0030017;GO:0030029	actin cytoskeleton;actin binding;muscle fiber development;sarcomere;actin filament-based process	cellular_component;molecular_function;biological_process;cellular_component;biological_process	ko04510;ko04010	Focal adhesion;MAPK signaling pathway	Cellular Processes;Environmental Information Processing
ENSONIG00000016141 : ENSONIG00000016141 : ENSONIP00000065715.1	ENSONIG00000016141	0.754711	no	down	0.0791573	no	ENSONIP00000065715.1	1.1544	no	up	0.0536217	no	GO:0004872;GO:0001568;GO:0044419;GO:0007155;GO:0007229;GO:0008305	receptor activity;blood vessel development;interspecies interaction between organisms;cell adhesion;integrin-mediated signaling pathway;integrin complex	molecular_function;biological_process;biological_process;biological_process;biological_process;cellular_component	ko04145;ko05410;ko05222;ko04512;ko05412;ko05414;ko04510;ko05200;ko04810;ko04514	Phagosome;Hypertrophic cardiomyopathy (HCM;Small cell lung cancer;ECM-receptor interaction;Arrhythmogenic right ventricular cardiomyopathy (ARVC;Dilated cardiomyopathy;Focal adhesion;Pathways in cancer;Regulation of actin cytoskeleton;Cell adhesion molecules (CAMs	Cellular Processes;Human Diseases;Human Diseases;Environmental Information Processing;Human Diseases;Human Diseases;Cellular Processes;Human Diseases;Cellular Processes;Environmental Information Processing
ENSONIG00000002786 : ENSONIG00000002786 : ENSONIP00000074645.1	ENSONIG00000002786	1.00975	no	up	0.54981	no	ENSONIP00000074645.1	1.01005	no	up	0.847554	no	GO:0005737;GO:0005886	cytoplasm;plasma membrane	cellular_component;cellular_component	.	.	.
ENSONIG00000002695 : ENSONIG00000002695 : ENSONIP00000028826.1	ENSONIG00000002695	0.940514	no	down	0.846937	no	ENSONIP00000028826.1	0.96047	no	down	0.435727	no	GO:0006541;GO:0006144;GO:0005829;GO:0005524;GO:0006189;GO:0004642	glutamine metabolic process;purine base metabolic process;cytosol;ATP binding;'de novo' IMP biosynthetic process;phosphoribosylformylglycinamidine synthase activity	biological_process;biological_process;cellular_component;molecular_function;biological_process;molecular_function	ko00230	Purine metabolism	Metabolism
ENSONIG00000003220 : ENSONIG00000003220 : ENSONIP00000004042.2	ENSONIG00000003220	1.38004	no	up	0.0735542	no	ENSONIP00000004042.2	1.1544	no	up	0.0301793	yes	GO:0030023;GO:0042802;GO:0010811;GO:0007155;GO:0030198;GO:0005581	extracellular matrix constituent conferring elasticity;identical protein binding;positive regulation of cell-substrate adhesion;cell adhesion;extracellular matrix organization;collagen	molecular_function;molecular_function;biological_process;biological_process;biological_process;cellular_component	.	.	.
ENSONIG00000001248 : ENSONIG00000001248 : ENSONIP00000001575.2	ENSONIG00000001248	0.954169	no	down	0.969944	no	ENSONIP00000001575.2	0.909004	no	down	0.0886772	no	.	.	.	.	.	.
ENSONIG00000006861 : ENSONIG00000006861 : ENSONIP00000008657.2	ENSONIG00000006861	0.335247	yes	down	0.00303484	yes	ENSONIP00000008657.2	0.91022	no	down	0.0954517	no	GO:0060710;GO:0007157;GO:0001968;GO:0001974;GO:0008305;GO:0060485;GO:0007229;GO:0004872;GO:0016477;GO:0009897;GO:0007160;GO:0007159;GO:0061032;GO:0060324	chorio-allantoic fusion;heterophilic cell-cell adhesion;fibronectin binding;blood vessel remodeling;integrin complex;mesenchyme development;integrin-mediated signaling pathway;receptor activity;cell migration;external side of plasma membrane;cell-matrix adhesion;leukocyte cell-cell adhesion;visceral serous pericardium development;face development	biological_process;biological_process;molecular_function;biological_process;cellular_component;biological_process;biological_process;molecular_function;biological_process;cellular_component;biological_process;biological_process;biological_process;biological_process	ko04514;ko04810;ko04640;ko05140;ko05410;ko04670;ko04672;ko04512;ko04510;ko05414;ko05412	Cell adhesion molecules (CAMs;Regulation of actin cytoskeleton;Hematopoietic cell lineage;Leishmaniasis;Hypertrophic cardiomyopathy (HCM;Leukocyte transendothelial migration;Intestinal immune network for IgA production;ECM-receptor interaction;Focal adhesion;Dilated cardiomyopathy;Arrhythmogenic right ventricular cardiomyopathy (ARVC	Environmental Information Processing;Cellular Processes;Organismal Systems;Human Diseases;Human Diseases;Organismal Systems;Organismal Systems;Environmental Information Processing;Cellular Processes;Human Diseases;Human Diseases
ENSONIG00000016037 : ENSONIG00000016037 : ENSONIP00000020203.2	ENSONIG00000016037	0.583721	no	down	8.28798e-05	yes	ENSONIP00000020203.2	0.998668	no	down	0.969641	no	.	.	.	.	.	.
ENSONIG00000010149 : ENSONIG00000010149 : ENSONIP00000051802.1	ENSONIG00000010149	0.835276	no	down	0.03849	yes	ENSONIP00000051802.1	0.99005	no	down	0.280508	no	.	.	.	.	.	.
ENSONIG00000001876 : ENSONIG00000001876 : ENSONIP00000002346.1	ENSONIG00000001876	0.934577	no	down	0.73552	no	ENSONIP00000002346.1	0.881191	no	down	0.0110908	yes	GO:0008168;GO:0004641;GO:0005737;GO:0006189;GO:0004637;GO:0046872;GO:0009113;GO:0005524;GO:0004644	methyltransferase activity;phosphoribosylformylglycinamidine cyclo-ligase activity;cytoplasm;'de novo' IMP biosynthetic process;phosphoribosylamine-glycine ligase activity;metal ion binding;purine base biosynthetic process;ATP binding;phosphoribosylglycinamide formyltransferase activity	molecular_function;molecular_function;cellular_component;biological_process;molecular_function;molecular_function;biological_process;molecular_function;molecular_function	ko00670;ko00230	One carbon pool by folate;Purine metabolism	Metabolism;Metabolism
ENSONIG00000000739 : ENSONIG00000000739 : ENSONIP00000047044.1	ENSONIG00000000739	5.84495	yes	up	1.02727e-08	yes	ENSONIP00000047044.1	0.778832	yes	down	0.0142326	yes	GO:0005576	extracellular region	cellular_component	.	.	.
ENSONIG00000012558 : ENSONIG00000012558 : ENSONIP00000015809.2	ENSONIG00000012558	1.11579	no	up	0.134545	no	ENSONIP00000015809.2	0.889484	no	down	0.0244412	yes	.	.	.	.	.	.
ENSONIG00000011504 : ENSONIG00000011504 : ENSONIP00000014480.2	ENSONIG00000011504	0.925596	no	down	0.733492	no	ENSONIP00000014480.2	1.06078	no	up	0.459947	no	GO:0006457;GO:0003755;GO:0042277;GO:0005759	protein folding;peptidyl-prolyl cis-trans isomerase activity;peptide binding;mitochondrial matrix	biological_process;molecular_function;molecular_function;cellular_component	.	.	.
ENSONIG00000001553 : ENSONIG00000001553 : ENSONIP00000001941.2	ENSONIG00000001553	0.884038	no	down	0.207259	no	ENSONIP00000001941.2	0.912046	no	down	0.212421	no	GO:0005634;GO:0003677;GO:0016568	nucleus;DNA binding;chromatin modification	cellular_component;molecular_function;biological_process	.	.	.
ENSONIG00000000405 : ENSONIG00000000405 : ENSONIP00000000515.2	ENSONIG00000000405	1.14247	no	up	0.000287862	yes	ENSONIP00000000515.2	0.93486	no	down	0.14579	no	GO:0005764;GO:0006013;GO:0004559;GO:0030246;GO:0008270	lysosome;mannose metabolic process;alpha-mannosidase activity;carbohydrate binding;zinc ion binding	cellular_component;biological_process;molecular_function;molecular_function;molecular_function	ko00511;ko04142	Other glycan degradation;Lysosome	Metabolism;Cellular Processes
ENSONIG00000018897 : ENSONIG00000018897 : ENSONIP00000053971.1	ENSONIG00000018897	0.885467	no	down	0.713932	no	ENSONIP00000053971.1	0.907502	no	down	0.00606321	yes	GO:0006810;GO:0016021	transport;integral to membrane	biological_process;cellular_component	.	.	.
ENSONIG00000017305 : ENSONIG00000017305 : ENSONIP00000056398.1	ENSONIG00000017305	1.13079	no	up	0.0415353	yes	ENSONIP00000056398.1	1.09829	no	up	0.0940358	no	GO:0016568;GO:0003677;GO:0006334;GO:0000786	chromatin modification;DNA binding;nucleosome assembly;nucleosome	biological_process;molecular_function;biological_process;cellular_component	ko05322	Systemic lupus erythematosus	Human Diseases
ENSONIG00000018370 : ENSONIG00000018370 : ENSONIP00000023128.1	ENSONIG00000018370	0.768393	no	down	0.000366388	yes	ENSONIP00000023128.1	0.825068	yes	down	0.0208901	yes	GO:0042147;GO:0071203;GO:0031901	retrograde transport, endosome to Golgi;WASH complex;early endosome membrane	biological_process;cellular_component;cellular_component	ko05014	Amyotrophic lateral sclerosis (ALS	Human Diseases
ENSONIG00000005652 : ENSONIG00000005652 : ENSONIP00000007116.2	ENSONIG00000005652	0.814581	no	down	0.00951278	yes	ENSONIP00000007116.2	1.07938	no	up	0.0466831	yes	GO:0005783;GO:0048471;GO:0006913;GO:0005634	endoplasmic reticulum;perinuclear region of cytoplasm;nucleocytoplasmic transport;nucleus	cellular_component;cellular_component;biological_process;cellular_component	.	.	.
ENSONIG00000016176 : ENSONIG00000016176 : ENSONIP00000062127.1	ENSONIG00000016176	0.84313	no	down	0.0649482	no	ENSONIP00000062127.1	0.770434	yes	down	0.0260193	yes	GO:0006221;GO:0005524;GO:0003883;GO:0006541	pyrimidine nucleotide biosynthetic process;ATP binding;CTP synthase activity;glutamine metabolic process	biological_process;molecular_function;molecular_function;biological_process	ko00240	Pyrimidine metabolism	Metabolism
ENSONIG00000017385 : ENSONIG00000017385 : ENSONIP00000021924.1	ENSONIG00000017385	0.795258	no	down	0.000970374	yes	ENSONIP00000021924.1	0.947744	no	down	0.0353291	yes	GO:0007173;GO:0030276;GO:0005794;GO:0042059;GO:0016032;GO:0005829;GO:0016192;GO:0007268;GO:0030665;GO:0006886;GO:0005886;GO:0030666;GO:0008565;GO:0048011;GO:0007411;GO:0050690;GO:0005905;GO:0030131;GO:0005488;GO:0006897	epidermal growth factor receptor signaling pathway;clathrin binding;Golgi apparatus;negative regulation of epidermal growth factor receptor signaling pathway;viral reproduction;cytosol;vesicle-mediated transport;synaptic transmission;clathrin coated vesicle membrane;intracellular protein transport;plasma membrane;endocytic vesicle membrane;protein transporter activity;nerve growth factor receptor…	biological_process;molecular_function;cellular_component;biological_process;biological_process;cellular_component;biological_process;biological_process;cellular_component;biological_process;cellular_component;cellular_component;molecular_function;biological_process;biological_process;biological_process;cellular_component;cellular_component;molecular_function;biological_process	ko04144;ko05016	Endocytosis;Huntington's disease	Cellular Processes;Human Diseases
ENSONIG00000019319 : ENSONIG00000019319 : ENSONIP00000024319.2	ENSONIG00000019319	0.520379	no	down	0.00183656	yes	ENSONIP00000024319.2	0.940796	no	down	0.15682	no	GO:0017124;GO:0030487;GO:0006915;GO:0005625;GO:0016020;GO:0030863;GO:0005829;GO:0005884	SH3 domain binding;inositol-4,5-bisphosphate 5-phosphatase activity;apoptosis;soluble fraction;membrane;cortical cytoskeleton;cytosol;actin filament	molecular_function;molecular_function;biological_process;cellular_component;cellular_component;cellular_component;cellular_component;cellular_component	ko04070;ko04664;ko04662;ko04910;ko04666	Phosphatidylinositol signaling system;Fc epsilon RI signaling pathway;B cell receptor signaling pathway;Insulin signaling pathway;Fc gamma R-mediated phagocytosis	Environmental Information Processing;Organismal Systems;Organismal Systems;Organismal Systems;Organismal Systems
ENSONIG00000000877 : ENSONIG00000000877 : ENSONIP00000071952.1	ENSONIG00000000877	0.831584	no	down	0.140666	no	ENSONIP00000071952.1	1.01783	no	up	0.474416	no	GO:0006811;GO:0005856;GO:0005938;GO:0008270	ion transport;cytoskeleton;cell cortex;zinc ion binding	biological_process;cellular_component;cellular_component;molecular_function	.	.	.
ENSONIG00000010880 : ENSONIG00000010880 : ENSONIP00000013689.2	ENSONIG00000010880	0.895197	no	down	0.349797	no	ENSONIP00000013689.2	0.961425	no	down	0.499495	no	GO:0007067;GO:0000910;GO:0005826;GO:0000921;GO:0003779;GO:0007096;GO:0005634	mitosis;cytokinesis;actomyosin contractile ring;septin ring assembly;actin binding;regulation of exit from mitosis;nucleus	biological_process;biological_process;cellular_component;biological_process;molecular_function;biological_process;cellular_component	.	.	.
ENSONIG00000011534 : ENSONIG00000011534 : ENSONIP00000014526.2	ENSONIG00000011534	0.571716	no	down	0.0023906	yes	ENSONIP00000014526.2	0.845326	no	down	0.0115038	yes	GO:0016787;GO:0016021;GO:0016042;GO:0005886	hydrolase activity;integral to membrane;lipid catabolic process;plasma membrane	molecular_function;cellular_component;biological_process;cellular_component	ko00565	Ether lipid metabolism	Metabolism
ENSONIG00000015969 : ENSONIG00000015969 : ENSONIP00000061551.1	ENSONIG00000015969	0.848215	no	down	0.252122	no	ENSONIP00000061551.1	0.969796	no	down	0.470922	no	GO:0005001;GO:0006468;GO:0016021;GO:0005634;GO:0005886;GO:0005737;GO:0045111;GO:0046627	transmembrane receptor protein tyrosine phosphatase activity;protein phosphorylation;integral to membrane;nucleus;plasma membrane;cytoplasm;intermediate filament cytoskeleton;negative regulation of insulin receptor signaling pathway	molecular_function;biological_process;cellular_component;cellular_component;cellular_component;cellular_component;cellular_component;biological_process	.	.	.
ENSONIG00000016747 : ENSONIG00000016747 : ENSONIP00000021099.1	ENSONIG00000016747	0.993197	no	down	0.475665	no	ENSONIP00000021099.1	1.23464	yes	up	0.156312	no	GO:0008270;GO:0005524;GO:0003676;GO:0008026	zinc ion binding;ATP binding;nucleic acid binding;ATP-dependent helicase activity	molecular_function;molecular_function;molecular_function;molecular_function	ko00230	Purine metabolism	Metabolism
ENSONIG00000003670 : ENSONIG00000003670 : ENSONIP00000004617.1	ENSONIG00000003670	0.679767	no	down	0.000147772	yes	ENSONIP00000004617.1	0.96528	no	down	0.29302	no	GO:0006099;GO:0050661;GO:0016021;GO:0008750;GO:0003957;GO:0005746;GO:0051287	tricarboxylic acid cycle;NADP binding;integral to membrane;NAD(P)+ transhydrogenase (AB-specific) activity;NAD(P)+ transhydrogenase (B-specific) activity;mitochondrial respiratory chain;NAD binding	biological_process;molecular_function;cellular_component;molecular_function;molecular_function;cellular_component;molecular_function	ko00760	Nicotinate and nicotinamide metabolism	Metabolism
ENSONIG00000014440 : ENSONIG00000014440 : ENSONIP00000018158.1	ENSONIG00000014440	1.23005	no	up	0.00743195	yes	ENSONIP00000018158.1	0.819836	yes	down	0.0324316	yes	.	.	.	ko00564;ko00561	Glycerophospholipid metabolism;Glycerolipid metabolism	Metabolism;Metabolism
ENSONIG00000005480 : ENSONIG00000005480 : ENSONIP00000061694.1	ENSONIG00000005480	1.06868	no	up	0.151615	no	ENSONIP00000061694.1	0.87586	no	down	0.000429442	yes	GO:0005739;GO:0003735;GO:0006412;GO:0005840	mitochondrion;structural constituent of ribosome;translation;ribosome	cellular_component;molecular_function;biological_process;cellular_component	.	.	.
ENSONIG00000000100 : ENSONIG00000000100 : ENSONIP00000070871.1	ENSONIG00000000100	1.13306	no	up	0.0464918	yes	ENSONIP00000070871.1	0.958537	no	down	0.709974	no	GO:0031305;GO:0008535;GO:0051204;GO:0008565	integral to mitochondrial inner membrane;respiratory chain complex IV assembly;protein insertion into mitochondrial membrane;protein transporter activity	cellular_component;biological_process;biological_process;molecular_function	.	.	.
ENSONIG00000000737 : ENSONIG00000000737 : ENSONIP00000000929.1	ENSONIG00000000737	2.05357	yes	up	0.000296932	yes	ENSONIP00000000929.1	1.09864	no	up	0.175126	no	GO:0005788;GO:0005506;GO:0004656;GO:0016702;GO:0031418;GO:0005739	endoplasmic reticulum lumen;iron ion binding;procollagen-proline 4-dioxygenase activity;oxidoreductase activity, acting on single donors with incorporation of molecular oxygen, incorporation of two atoms of oxygen;L-ascorbic acid binding;mitochondrion	cellular_component;molecular_function;molecular_function;molecular_function;molecular_function;cellular_component	ko00330	Arginine and proline metabolism	Metabolism
ENSONIG00000016516 : ENSONIG00000016516 : ENSONIP00000020796.1	ENSONIG00000016516	0.671658	no	down	4.73716e-10	yes	ENSONIP00000020796.1	0.874687	no	down	0.017503	yes	GO:0006351;GO:0048208;GO:0016021;GO:0005789;GO:0043687;GO:0006355;GO:0005634;GO:0003677;GO:0015031;GO:0018279	transcription, DNA-dependent;COPII vesicle coating;integral to membrane;endoplasmic reticulum membrane;post-translational protein modification;regulation of transcription, DNA-dependent;nucleus;DNA binding;protein transport;protein N-linked glycosylation via asparagine	biological_process;biological_process;cellular_component;cellular_component;biological_process;biological_process;cellular_component;molecular_function;biological_process;biological_process	.	.	.
ENSONIG00000005960 : ENSONIG00000005960 : ENSONIP00000054972.1	ENSONIG00000005960	1.02736	no	up	0.316589	no	ENSONIP00000054972.1	0.85701	no	down	0.288492	no	.	.	.	ko05131;ko04621;ko05120	Shigellosis;NOD-like receptor signaling pathway;Epithelial cell signaling in Helicobacter pylori infection	Human Diseases;Organismal Systems;Human Diseases
ENSONIG00000018857 : ENSONIG00000018857 : ENSONIP00000080901.1	ENSONIG00000018857	0.855466	no	down	0.0380794	yes	ENSONIP00000080901.1	0.916933	no	down	0.413157	no	GO:0030127;GO:0008270;GO:0000139;GO:0006886;GO:0006888;GO:0030868	COPII vesicle coat;zinc ion binding;Golgi membrane;intracellular protein transport;ER to Golgi vesicle-mediated transport;smooth endoplasmic reticulum membrane	cellular_component;molecular_function;cellular_component;biological_process;biological_process;cellular_component	.	.	.
ENSONIG00000013866 : ENSONIG00000013866 : ENSONIP00000049259.1	ENSONIG00000013866	0.966827	no	down	0.73811	no	ENSONIP00000049259.1	1.01207	no	up	0.365284	no	.	.	.	.	.	.
ENSONIG00000013186 : ENSONIG00000013186 : ENSONIP00000016582.2	ENSONIG00000013186	0.842194	no	down	0.0960761	no	ENSONIP00000016582.2	0.917226	no	down	0.125778	no	GO:0005509;GO:0005794;GO:0016021;GO:0005886;GO:0030054;GO:0005768;GO:0007156	calcium ion binding;Golgi apparatus;integral to membrane;plasma membrane;cell junction;endosome;homophilic cell adhesion	molecular_function;cellular_component;cellular_component;cellular_component;cellular_component;cellular_component;biological_process	ko05200;ko05100;ko05216;ko05213;ko04514;ko05219;ko05130;ko05218;ko04520	Pathways in cancer;Bacterial invasion of epithelial cells;Thyroid cancer;Endometrial cancer;Cell adhesion molecules (CAMs;Bladder cancer;Pathogenic Escherichia coli infection;Melanoma;Adherens junction	Human Diseases;Human Diseases;Human Diseases;Human Diseases;Environmental Information Processing;Human Diseases;Human Diseases;Human Diseases;Cellular Processes
ENSONIG00000006277 : ENSONIG00000006277 : ENSONIP00000007909.2	ENSONIG00000006277	0.497694	yes	down	9.54544e-07	yes	ENSONIP00000007909.2	1.16727	no	up	0.0230147	yes	GO:0003779;GO:0016459;GO:0003774;GO:0005923	actin binding;myosin complex;motor activity;tight junction	molecular_function;cellular_component;molecular_function;cellular_component	ko04530	Tight junction	Cellular Processes
ENSONIG00000012130 : ENSONIG00000012130 : ENSONIP00000015274.1	ENSONIG00000012130	0.896793	no	down	0.296391	no	ENSONIP00000015274.1	1.00938	no	up	0.875395	no	.	.	.	.	.	.
ENSONIG00000001569 : ENSONIG00000001569 : ENSONIP00000001962.1	ENSONIG00000001569	0.695638	no	down	0.0889463	no	ENSONIP00000001962.1	1.21031	yes	up	0.00614456	yes	.	.	.	.	.	.
ENSONIG00000000859 : ENSONIG00000000859 : ENSONIP00000001090.1	ENSONIG00000000859	0.967638	no	down	0.878626	no	ENSONIP00000001090.1	0.939237	no	down	0.0381714	yes	GO:0006397;GO:0005634;GO:0005488;GO:0008380	mRNA processing;nucleus;binding;RNA splicing	biological_process;cellular_component;molecular_function;biological_process	.	.	.
ENSONIG00000010416 : ENSONIG00000010416 : ENSONIP00000013093.2	ENSONIG00000010416	0.994826	no	down	0.630617	no	ENSONIP00000013093.2	0.929582	no	down	0.0749541	no	GO:0016021;GO:0070469;GO:0046872;GO:0005743;GO:0022900;GO:0051537;GO:0008121	integral to membrane;respiratory chain;metal ion binding;mitochondrial inner membrane;electron transport chain;2 iron, 2 sulfur cluster binding;ubiquinol-cytochrome-c reductase activity	cellular_component;cellular_component;molecular_function;cellular_component;biological_process;molecular_function;molecular_function	ko00190;ko05012;ko05010;ko04260;ko05016	Oxidative phosphorylation;Parkinson's disease;Alzheimer's disease;Cardiac muscle contraction;Huntington's disease	Metabolism;Human Diseases;Human Diseases;Organismal Systems;Human Diseases
ENSONIG00000001657 : ENSONIG00000001657 : ENSONIP00000050584.1	ENSONIG00000001657	1.06369	no	up	0.0368911	yes	ENSONIP00000050584.1	0.942071	no	down	0.0236133	yes	GO:0000082;GO:0000209;GO:0006521;GO:0042981;GO:0000084;GO:0016887;GO:0016032;GO:0016071;GO:0005654;GO:0005829;GO:0002474;GO:0000216;GO:0000502;GO:0006915;GO:0031145;GO:0030674;GO:0051437;GO:0005524;GO:0051436;GO:0006977	G1/S transition of mitotic cell cycle;protein polyubiquitination;regulation of cellular amino acid metabolic process;regulation of apoptosis;S phase of mitotic cell cycle;ATPase activity;viral reproduction;mRNA metabolic process;nucleoplasm;cytosol;antigen processing and presentation of peptide antigen via MHC class I;M/G1 transition of mitotic cell cycle;proteasome complex;apoptosis;anaphase-pro…	biological_process;biological_process;biological_process;biological_process;biological_process;molecular_function;biological_process;biological_process;cellular_component;cellular_component;biological_process;biological_process;cellular_component;biological_process;biological_process;molecular_function;biological_process;molecular_function;biological_process;biological_process	ko03050	Proteasome	Genetic Information Processing
ENSONIG00000001572 : ENSONIG00000001572 : ENSONIP00000001967.2	ENSONIG00000001572	1812.7	yes	up	1	no	ENSONIP00000001967.2	1.01647	no	up	0.658246	no	GO:0047021;GO:0005488;GO:0050221;GO:0005737;GO:0042373;GO:0004090;GO:0017144	15-hydroxyprostaglandin dehydrogenase (NADP+) activity;binding;prostaglandin-E2 9-reductase activity;cytoplasm;vitamin K metabolic process;carbonyl reductase (NADPH) activity;drug metabolic process	molecular_function;molecular_function;molecular_function;cellular_component;biological_process;molecular_function;biological_process	.	.	.
ENSONIG00000012194 : ENSONIG00000012194 : ENSONIP00000075606.1	ENSONIG00000012194	0.853447	no	down	0.0489891	yes	ENSONIP00000075606.1	1.03286	no	up	0.164822	no	.	.	.	ko05212;ko04620;ko05140;ko04630;ko05200;ko04062	Pancreatic cancer;Toll-like receptor signaling pathway;Leishmaniasis;Jak-STAT signaling pathway;Pathways in cancer;Chemokine signaling pathway	Human Diseases;Organismal Systems;Human Diseases;Environmental Information Processing;Human Diseases;Organismal Systems
ENSONIG00000006454 : ENSONIG00000006454 : ENSONIP00000008136.2	ENSONIG00000006454	1.16955	no	up	0.000221232	yes	ENSONIP00000008136.2	0.863043	no	down	0.0344927	yes	GO:0006355;GO:0018024;GO:0005694;GO:0005634;GO:0003677;GO:0006351;GO:0008270	regulation of transcription, DNA-dependent;histone-lysine N-methyltransferase activity;chromosome;nucleus;DNA binding;transcription, DNA-dependent;zinc ion binding	biological_process;molecular_function;cellular_component;cellular_component;molecular_function;biological_process;molecular_function	ko00310	Lysine degradation	Metabolism
ENSONIG00000014119 : ENSONIG00000014119 : ENSONIP00000017750.1	ENSONIG00000014119	0.983656	no	down	0.582997	no	ENSONIP00000017750.1	0.941748	no	down	0.0538655	no	GO:0005739;GO:0016331;GO:0009952;GO:0006397;GO:0005681;GO:0008380;GO:0005654;GO:0043484;GO:0003723;GO:0000166	mitochondrion;morphogenesis of embryonic epithelium;anterior/posterior pattern specification;mRNA processing;spliceosomal complex;RNA splicing;nucleoplasm;regulation of RNA splicing;RNA binding;nucleotide binding	cellular_component;biological_process;biological_process;biological_process;cellular_component;biological_process;cellular_component;biological_process;molecular_function;molecular_function	.	.	.
ENSONIG00000002383 : ENSONIG00000002383 : ENSONIP00000002978.2	ENSONIG00000002383	15.6974	yes	up	1.88304e-08	yes	ENSONIP00000002978.2	1.14016	no	up	0.0507883	no	.	.	.	.	.	.
ENSONIG00000015313 : ENSONIG00000015313 : ENSONIP00000036917.1	ENSONIG00000015313	1.04855	no	up	0.0871314	no	ENSONIP00000036917.1	0.957586	no	down	0.38011	no	GO:0009749;GO:0009408;GO:0014003;GO:0005851;GO:0032057;GO:0003743;GO:0001541;GO:0005829;GO:0043434;GO:0042552;GO:0031369	response to glucose stimulus;response to heat;oligodendrocyte development;eukaryotic translation initiation factor 2B complex;negative regulation of translational initiation in response to stress;translation initiation factor activity;ovarian follicle development;cytosol;response to peptide hormone stimulus;myelination;translation initiation factor binding	biological_process;biological_process;biological_process;cellular_component;biological_process;molecular_function;biological_process;cellular_component;biological_process;biological_process;molecular_function	.	.	.
ENSONIG00000001324 : ENSONIG00000001324 : ENSONIP00000001674.1	ENSONIG00000001324	0.472057	yes	down	1	no	ENSONIP00000001674.1	1.02224	no	up	0.663206	no	GO:0005509;GO:0016021;GO:0007156;GO:2000114	calcium ion binding;integral to membrane;homophilic cell adhesion;regulation of establishment of cell polarity	molecular_function;cellular_component;biological_process;biological_process	ko04670;ko04514	Leukocyte transendothelial migration;Cell adhesion molecules (CAMs	Organismal Systems;Environmental Information Processing
ENSONIG00000006409 : ENSONIG00000006409 : ENSONIP00000008081.2	ENSONIG00000006409	0.97107	no	down	0.908467	no	ENSONIP00000008081.2	0.911437	no	down	0.0586869	no	GO:0005856;GO:0005886;GO:0005737;GO:0007165	cytoskeleton;plasma membrane;cytoplasm;signal transduction	cellular_component;cellular_component;cellular_component;biological_process	ko04320	Dorso-ventral axis formation	Organismal Systems
ENSONIG00000020466 : ENSONIG00000020466 : ENSONIP00000025771.2	ENSONIG00000020466	1.65571	no	up	0.00553071	yes	ENSONIP00000025771.2	1.02326	no	up	0.814147	no	GO:0042802;GO:0016021;GO:0005923;GO:0016338;GO:0005198	identical protein binding;integral to membrane;tight junction;calcium-independent cell-cell adhesion;structural molecule activity	molecular_function;cellular_component;cellular_component;biological_process;molecular_function	ko04530;ko04514;ko04670	Tight junction;Cell adhesion molecules (CAMs;Leukocyte transendothelial migration	Cellular Processes;Environmental Information Processing;Organismal Systems
ENSONIG00000014549 : ENSONIG00000014549 : ENSONIP00000018309.1	ENSONIG00000014549	0.867896	no	down	0.186716	no	ENSONIP00000018309.1	0.877034	no	down	0.0464838	yes	.	.	.	.	.	.
ENSONIG00000019414 : ENSONIG00000019414 : ENSONIP00000024438.2	ENSONIG00000019414	0.806889	no	down	0.0207416	yes	ENSONIP00000024438.2	0.963351	no	down	0.574138	no	GO:0008083;GO:0006897;GO:0005769;GO:0005096;GO:0015031	growth factor activity;endocytosis;early endosome;GTPase activator activity;protein transport	molecular_function;biological_process;cellular_component;molecular_function;biological_process	ko04144	Endocytosis	Cellular Processes
ENSONIG00000021321 : ENSONIG00000021321 : ENSONIP00000026623.1	ENSONIG00000021321	0.880677	no	down	0.190923	no	ENSONIP00000026623.1	0.882648	no	down	0.0993051	no	GO:0016032;GO:0010827;GO:0005829;GO:0055085;GO:0005643;GO:0015758;GO:0005975;GO:0005215;GO:0015031;GO:0051028	viral reproduction;regulation of glucose transport;cytosol;transmembrane transport;nuclear pore;glucose transport;carbohydrate metabolic process;transporter activity;protein transport;mRNA transport	biological_process;biological_process;cellular_component;biological_process;cellular_component;biological_process;biological_process;molecular_function;biological_process;biological_process	.	.	.
ENSONIG00000007748 : ENSONIG00000007748 : ENSONIP00000027637.1	ENSONIG00000007748	2.08708	yes	up	1.22112e-13	yes	ENSONIP00000027637.1	0.952164	no	down	0.0531457	no	.	.	.	.	.	.
ENSONIG00000015757 : ENSONIG00000015757 : ENSONIP00000019834.2	ENSONIG00000015757	0.712691	no	down	1.07697e-06	yes	ENSONIP00000019834.2	0.887386	no	down	0.0157554	yes	GO:0001948;GO:0005010;GO:0005215;GO:0005765;GO:0005768;GO:0030139;GO:0051219;GO:0005887;GO:0006898;GO:0030140;GO:0009986	glycoprotein binding;insulin-like growth factor-activated receptor activity;transporter activity;lysosomal membrane;endosome;endocytic vesicle;phosphoprotein binding;integral to plasma membrane;receptor-mediated endocytosis;trans-Golgi network transport vesicle;cell surface	molecular_function;molecular_function;molecular_function;cellular_component;cellular_component;cellular_component;molecular_function;cellular_component;biological_process;cellular_component;cellular_component	ko04142	Lysosome	Cellular Processes
ENSONIG00000020235 : ENSONIG00000020235 : ENSONIP00000037546.1	ENSONIG00000020235	1.19005	no	up	0.0454854	yes	ENSONIP00000037546.1	1.05691	no	up	0.417739	no	GO:0005525;GO:0030154;GO:0007264;GO:0005815;GO:0007399;GO:0005886	GTP binding;cell differentiation;small GTPase mediated signal transduction;microtubule organizing center;nervous system development;plasma membrane	molecular_function;biological_process;biological_process;cellular_component;biological_process;cellular_component	ko04660;ko05200;ko05131;ko05212;ko04011;ko04520;ko05130;ko04360;ko04062;ko04666;ko04144;ko04810;ko05100;ko04010;ko04530;ko05120;ko04722;ko04510;ko05211;ko04670;ko04370;ko04912	T cell receptor signaling pathway;Pathways in cancer;Shigellosis;Pancreatic cancer;MAPK signaling pathway - yeast;Adherens junction;Pathogenic Escherichia coli infection;Axon guidance;Chemokine signaling pathway;Fc gamma R-mediated phagocytosis;Endocytosis;Regulation of actin cytoskeleton;Bacterial invasion of epithelial cells;MAPK signaling pathway;Tight junction;Epithelial cell signaling in Hel…	Organismal Systems;Human Diseases;Human Diseases;Human Diseases;Environmental Information Processing;Cellular Processes;Human Diseases;Organismal Systems;Organismal Systems;Organismal Systems;Cellular Processes;Cellular Processes;Human Diseases;Environmental Information Processing;Cellular Processes;Human Diseases;Organismal Systems;Cellular Processes;Human Diseases;Organismal Systems;Environment…
ENSONIG00000013125 : ENSONIG00000013125 : ENSONIP00000016511.2	ENSONIG00000013125	0.925311	no	down	0.601865	no	ENSONIP00000016511.2	0.920615	no	down	0.290445	no	GO:0016593;GO:0006355;GO:0006351	Cdc73/Paf1 complex;regulation of transcription, DNA-dependent;transcription, DNA-dependent	cellular_component;biological_process;biological_process	.	.	.
ENSONIG00000010985 : ENSONIG00000010985 : ENSONIP00000047823.1	ENSONIG00000010985	0.916561	no	down	0.858032	no	ENSONIP00000047823.1	0.782764	yes	down	0.344866	no	GO:0016126;GO:0016021;GO:0004128	sterol biosynthetic process;integral to membrane;cytochrome-b5 reductase activity	biological_process;cellular_component;molecular_function	ko00520	Amino sugar and nucleotide sugar metabolism	Metabolism
ENSONIG00000006812 : ENSONIG00000006812 : ENSONIP00000029223.1	ENSONIG00000006812	0.914216	no	down	1	no	ENSONIP00000029223.1	1.07182	no	up	0.258514	no	GO:0032007;GO:0006469;GO:0042981;GO:0035556;GO:0005622;GO:0045792;GO:0005515	negative regulation of TOR signaling cascade;negative regulation of protein kinase activity;regulation of apoptosis;intracellular signal transduction;intracellular;negative regulation of cell size;protein binding	biological_process;biological_process;biological_process;biological_process;cellular_component;biological_process;molecular_function	.	.	.
ENSONIG00000005547 : ENSONIG00000005547 : ENSONIP00000006973.1	ENSONIG00000005547	0.982181	no	down	0.536442	no	ENSONIP00000006973.1	1.06612	no	up	0.0823574	no	GO:0005737;GO:0003743	cytoplasm;translation initiation factor activity	cellular_component;molecular_function	.	.	.
ENSONIG00000007279 : ENSONIG00000007279 : ENSONIP00000039747.1	ENSONIG00000007279	1.06517	no	up	0.0606311	no	ENSONIP00000039747.1	0.925225	no	down	0.123774	no	GO:0003682;GO:0042645;GO:0070363;GO:0045893;GO:0006391	chromatin binding;mitochondrial nucleoid;mitochondrial light strand promoter sense binding;positive regulation of transcription, DNA-dependent;transcription initiation from mitochondrial promoter	molecular_function;cellular_component;molecular_function;biological_process;biological_process	ko05016	Huntington's disease	Human Diseases
ENSONIG00000001659 : ENSONIG00000001659 : ENSONIP00000060000.1	ENSONIG00000001659	1.47916	no	up	1.53893e-13	yes	ENSONIP00000060000.1	1.01376	no	up	0.679794	no	GO:0005515;GO:0005741;GO:0008053;GO:0007275;GO:0005525;GO:0016021;GO:0003924	protein binding;mitochondrial outer membrane;mitochondrial fusion;multicellular organismal development;GTP binding;integral to membrane;GTPase activity	molecular_function;cellular_component;biological_process;biological_process;molecular_function;cellular_component;molecular_function	.	.	.
ENSONIG00000020389 : ENSONIG00000020389 : ENSONIP00000025694.2	ENSONIG00000020389	0.877258	no	down	0.316307	no	ENSONIP00000025694.2	1.07111	no	up	0.62992	no	GO:0005789;GO:0042572;GO:0008202;GO:0016021;GO:0052650;GO:0005488;GO:0004745	endoplasmic reticulum membrane;retinol metabolic process;steroid metabolic process;integral to membrane;NADP-retinol dehydrogenase activity;binding;retinol dehydrogenase activity	cellular_component;biological_process;biological_process;cellular_component;molecular_function;molecular_function;molecular_function	ko00830	Retinol metabolism	Metabolism
ENSONIG00000016046 : ENSONIG00000016046 : ENSONIP00000020216.2	ENSONIG00000016046	0.961987	no	down	0.900959	no	ENSONIP00000020216.2	0.854141	no	down	0.309534	no	GO:0048471;GO:0005794;GO:0005783;GO:0006888	perinuclear region of cytoplasm;Golgi apparatus;endoplasmic reticulum;ER to Golgi vesicle-mediated transport	cellular_component;cellular_component;cellular_component;biological_process	.	.	.
ENSONIG00000015118 : ENSONIG00000015118 : ENSONIP00000019024.2	ENSONIG00000015118	0.653486	no	down	3.585e-05	yes	ENSONIP00000019024.2	0.92926	no	down	0.00663383	yes	GO:0048365;GO:0007399;GO:0030424;GO:0005525;GO:0030154;GO:0005085;GO:0051020;GO:0043473	Rac GTPase binding;nervous system development;axon;GTP binding;cell differentiation;guanyl-nucleotide exchange factor activity;GTPase binding;pigmentation	molecular_function;biological_process;cellular_component;molecular_function;biological_process;molecular_function;molecular_function;biological_process	.	.	.
ENSONIG00000005548 : ENSONIG00000005548 : ENSONIP00000006974.2	ENSONIG00000005548	0.953687	no	down	0.963353	no	ENSONIP00000006974.2	1.18579	no	up	0.0132139	yes	GO:0016021;GO:0006810;GO:0010008;GO:0032580	integral to membrane;transport;endosome membrane;Golgi cisterna membrane	cellular_component;biological_process;cellular_component;cellular_component	ko05416;ko04530	Viral myocarditis;Tight junction	Human Diseases;Cellular Processes
ENSONIG00000012970 : ENSONIG00000012970 : ENSONIP00000067950.1	ENSONIG00000012970	0.126125	yes	down	1	no	ENSONIP00000067950.1	1.05058	no	up	0.490256	no	GO:0007565;GO:0004867;GO:0005615	female pregnancy;serine-type endopeptidase inhibitor activity;extracellular space	biological_process;molecular_function;cellular_component	ko04610	Complement and coagulation cascades	Organismal Systems
ENSONIG00000007765 : ENSONIG00000007765 : ENSONIP00000075926.1	ENSONIG00000007765	1.25236	no	up	2.13593e-07	yes	ENSONIP00000075926.1	1.10526	no	up	0.0386808	yes	GO:0043197;GO:0046872;GO:0006811;GO:0005516;GO:0003779;GO:0045202;GO:0005737;GO:0005856;GO:0042608;GO:0005886;GO:0007010	dendritic spine;metal ion binding;ion transport;calmodulin binding;actin binding;synapse;cytoplasm;cytoskeleton;T cell receptor binding;plasma membrane;cytoskeleton organization	cellular_component;molecular_function;biological_process;molecular_function;molecular_function;cellular_component;cellular_component;cellular_component;molecular_function;cellular_component;biological_process	.	.	.
ENSONIG00000002295 : ENSONIG00000002295 : ENSONIP00000002867.2	ENSONIG00000002295	0.597217	no	down	2.21546e-06	yes	ENSONIP00000002867.2	0.93486	no	down	0.17112	no	GO:0005524;GO:0070936;GO:0006513;GO:0004842	ATP binding;protein K48-linked ubiquitination;protein monoubiquitination;ubiquitin-protein ligase activity	molecular_function;biological_process;biological_process;molecular_function	.	.	.
ENSONIG00000018329 : ENSONIG00000018329 : ENSONIP00000023081.2	ENSONIG00000018329	1.02083	no	up	0.803586	no	ENSONIP00000023081.2	1.31699	yes	up	0.137506	no	GO:0005085;GO:0045202;GO:0030168;GO:0032587;GO:0030054;GO:0019992;GO:0005509;GO:0051056;GO:0001558;GO:0005829;GO:0007265;GO:0019717	guanyl-nucleotide exchange factor activity;synapse;platelet activation;ruffle membrane;cell junction;diacylglycerol binding;calcium ion binding;regulation of small GTPase mediated signal transduction;regulation of cell growth;cytosol;Ras protein signal transduction;synaptosome	molecular_function;cellular_component;biological_process;cellular_component;cellular_component;molecular_function;molecular_function;biological_process;biological_process;cellular_component;biological_process;cellular_component	ko04062;ko04010	Chemokine signaling pathway;MAPK signaling pathway	Organismal Systems;Environmental Information Processing
ENSONIG00000012416 : ENSONIG00000012416 : ENSONIP00000015641.2	ENSONIG00000012416	0.741952	no	down	0.00132335	yes	ENSONIP00000015641.2	0.811292	yes	down	0.105077	no	GO:0006508;GO:0004252;GO:0005737	proteolysis;serine-type endopeptidase activity;cytoplasm	biological_process;molecular_function;cellular_component	.	.	.
ENSONIG00000017855 : ENSONIG00000017855 : ENSONIP00000022508.1	ENSONIG00000017855	1.03751	no	up	0.224293	no	ENSONIP00000022508.1	0.997337	no	down	0.958677	no	GO:0007411;GO:0042476;GO:0005607;GO:0005606;GO:0005201;GO:0048471;GO:0005615;GO:0030335;GO:0050679;GO:0043259;GO:0043257;GO:0034446	axon guidance;odontogenesis;laminin-2 complex;laminin-1 complex;extracellular matrix structural constituent;perinuclear region of cytoplasm;extracellular space;positive regulation of cell migration;positive regulation of epithelial cell proliferation;laminin-10 complex;laminin-8 complex;substrate adhesion-dependent cell spreading	biological_process;biological_process;cellular_component;cellular_component;molecular_function;cellular_component;cellular_component;biological_process;biological_process;cellular_component;cellular_component;biological_process	ko04510;ko04512;ko05222;ko05200	Focal adhesion;ECM-receptor interaction;Small cell lung cancer;Pathways in cancer	Cellular Processes;Environmental Information Processing;Human Diseases;Human Diseases
ENSONIG00000001587 : ENSONIG00000001587 : ENSONIP00000080400.1	ENSONIG00000001587	1.24107	no	up	8.36316e-06	yes	ENSONIP00000080400.1	0.957259	no	down	0.000684193	yes	GO:0004777;GO:0005625;GO:0009450;GO:0007417;GO:0005739;GO:0051289	succinate-semialdehyde dehydrogenase activity;soluble fraction;gamma-aminobutyric acid catabolic process;central nervous system development;mitochondrion;protein homotetramerization	molecular_function;cellular_component;biological_process;biological_process;cellular_component;biological_process	ko00650;ko00250	Butanoate metabolism;Alanine, aspartate and glutamate metabolism	Metabolism;Metabolism
ENSONIG00000003728 : ENSONIG00000003728 : ENSONIP00000004687.1	ENSONIG00000003728	0.407555	yes	down	0.000384692	yes	ENSONIP00000004687.1	0.894222	no	down	0.0996979	no	GO:0004872;GO:0044456;GO:0033268;GO:0005887;GO:0043209;GO:0045163;GO:0007411;GO:0042802;GO:0044224;GO:0031225	receptor activity;synapse part;node of Ranvier;integral to plasma membrane;myelin sheath;clustering of voltage-gated potassium channels;axon guidance;identical protein binding;juxtaparanode region of axon;anchored to membrane	molecular_function;cellular_component;cellular_component;cellular_component;cellular_component;biological_process;biological_process;molecular_function;cellular_component;cellular_component	ko04514	Cell adhesion molecules (CAMs	Environmental Information Processing
ENSONIG00000002670 : ENSONIG00000002670 : ENSONIP00000035486.1	ENSONIG00000002670	1.76502	no	up	0.00764744	yes	ENSONIP00000035486.1	1.4077	yes	up	0.00564265	yes	.	.	.	.	.	.
ENSONIG00000005327 : ENSONIG00000005327 : ENSONIP00000006700.2	ENSONIG00000005327	0.50304	no	down	0.0108284	yes	ENSONIP00000006700.2	0.914486	no	down	0.0680486	no	GO:0005178;GO:0042995;GO:0007159;GO:0030054;GO:0070527;GO:0033622;GO:0033632;GO:0002102	integrin binding;cell projection;leukocyte cell-cell adhesion;cell junction;platelet aggregation;integrin activation;regulation of cell-cell adhesion mediated by integrin;podosome	molecular_function;cellular_component;biological_process;cellular_component;biological_process;biological_process;biological_process;cellular_component	.	.	.
ENSONIG00000020109 : ENSONIG00000020109 : ENSONIP00000056403.1	ENSONIG00000020109	0.135254	yes	down	1.21925e-29	yes	ENSONIP00000056403.1	0.710661	yes	down	0.00154232	yes	GO:0043171;GO:0007399;GO:0045453;GO:0006508;GO:0008240;GO:0046872;GO:0042470;GO:0004252;GO:0005625;GO:0005764	peptide catabolic process;nervous system development;bone resorption;proteolysis;tripeptidyl-peptidase activity;metal ion binding;melanosome;serine-type endopeptidase activity;soluble fraction;lysosome	biological_process;biological_process;biological_process;biological_process;molecular_function;molecular_function;cellular_component;molecular_function;cellular_component;cellular_component	ko04142	Lysosome	Cellular Processes
ENSONIG00000018146 : ENSONIG00000018146 : ENSONIP00000022863.2	ENSONIG00000018146	0.872381	no	down	0.138768	no	ENSONIP00000022863.2	0.988072	no	down	0.735377	no	GO:0007249;GO:0007417;GO:0001757;GO:0005524;GO:0043124;GO:0005737;GO:0055113;GO:0008384;GO:0043066;GO:0005515;GO:0005634	I-kappaB kinase/NF-kappaB cascade;central nervous system development;somite specification;ATP binding;negative regulation of I-kappaB kinase/NF-kappaB cascade;cytoplasm;epiboly involved in gastrulation with mouth forming second;IkappaB kinase activity;negative regulation of apoptosis;protein binding;nucleus	biological_process;biological_process;biological_process;molecular_function;biological_process;cellular_component;biological_process;molecular_function;biological_process;molecular_function;cellular_component	ko05222;ko04662;ko04062;ko04620;ko04623;ko05131;ko05212;ko05142;ko05200;ko04660;ko05220;ko04920;ko05215;ko05221;ko04622;ko05120;ko04210;ko04010;ko04621	Small cell lung cancer;B cell receptor signaling pathway;Chemokine signaling pathway;Toll-like receptor signaling pathway;Cytosolic DNA-sensing pathway;Shigellosis;Pancreatic cancer;Chagas disease;Pathways in cancer;T cell receptor signaling pathway;Chronic myeloid leukemia;Adipocytokine signaling pathway;Prostate cancer;Acute myeloid leukemia;RIG-I-like receptor signaling pathway;Epithelial cell…	Human Diseases;Organismal Systems;Organismal Systems;Organismal Systems;Organismal Systems;Human Diseases;Human Diseases;Human Diseases;Human Diseases;Organismal Systems;Human Diseases;Organismal Systems;Human Diseases;Human Diseases;Organismal Systems;Human Diseases;Cellular Processes;Environmental Information Processing;Organismal Systems
ENSONIG00000015214 : ENSONIG00000015214 : ENSONIP00000072302.1	ENSONIG00000015214	1.04875	no	up	0.697665	no	ENSONIP00000072302.1	0.662694	yes	down	0.171905	no	GO:0005415;GO:0001882;GO:0001895;GO:0034394;GO:0016021	nucleoside:sodium symporter activity;nucleoside binding;retina homeostasis;protein localization at cell surface;integral to membrane	molecular_function;molecular_function;biological_process;biological_process;cellular_component	.	.	.
ENSONIG00000016231 : ENSONIG00000016231 : ENSONIP00000020435.2	ENSONIG00000016231	1.00537	no	up	0.320195	no	ENSONIP00000020435.2	0.868265	no	down	0.200502	no	GO:0030132;GO:0030130;GO:0005198;GO:0006886	clathrin coat of coated pit;clathrin coat of trans-Golgi network vesicle;structural molecule activity;intracellular protein transport	cellular_component;cellular_component;molecular_function;biological_process	ko04144;ko04142;ko05016;ko05100	Endocytosis;Lysosome;Huntington's disease;Bacterial invasion of epithelial cells	Cellular Processes;Cellular Processes;Human Diseases;Human Diseases
ENSONIG00000015568 : ENSONIG00000015568 : ENSONIP00000027705.1	ENSONIG00000015568	0.827188	no	down	0.207677	no	ENSONIP00000027705.1	0.879111	no	down	0.00672583	yes	GO:0005509;GO:0005615;GO:0005794;GO:0005793;GO:0003677;GO:0005886;GO:0005829	calcium ion binding;extracellular space;Golgi apparatus;endoplasmic reticulum-Golgi intermediate compartment;DNA binding;plasma membrane;cytosol	molecular_function;cellular_component;cellular_component;cellular_component;molecular_function;cellular_component;cellular_component	ko05416;ko04530	Viral myocarditis;Tight junction	Human Diseases;Cellular Processes
ENSONIG00000001263 : ENSONIG00000001263 : ENSONIP00000070617.1	ENSONIG00000001263	1.04652	no	up	0.143113	no	ENSONIP00000070617.1	1.02566	no	up	0.74432	no	GO:0015935;GO:0003723;GO:0006412;GO:0003735	small ribosomal subunit;RNA binding;translation;structural constituent of ribosome	cellular_component;molecular_function;biological_process;molecular_function	ko03010	Ribosome	Genetic Information Processing
ENSONIG00000009585 : ENSONIG00000009585 : ENSONIP00000042053.1	ENSONIG00000009585	0.938064	no	down	0.811825	no	ENSONIP00000042053.1	0.770434	yes	down	0.083771	no	GO:0005515;GO:0004674;GO:0005524;GO:0005829;GO:0004713;GO:0000165	protein binding;protein serine/threonine kinase activity;ATP binding;cytosol;protein tyrosine kinase activity;MAPKKK cascade	molecular_function;molecular_function;molecular_function;cellular_component;molecular_function;biological_process	ko04620;ko05142;ko04012;ko05120;ko04664;ko04912;ko04010	Toll-like receptor signaling pathway;Chagas disease;ErbB signaling pathway;Epithelial cell signaling in Helicobacter pylori infection;Fc epsilon RI signaling pathway;GnRH signaling pathway;MAPK signaling pathway	Organismal Systems;Human Diseases;Environmental Information Processing;Human Diseases;Organismal Systems;Organismal Systems;Environmental Information Processing
ENSONIG00000007615 : ENSONIG00000007615 : ENSONIP00000057996.1	ENSONIG00000007615	1.5219	no	up	1.10834e-18	yes	ENSONIP00000057996.1	1.1544	no	up	0.0742336	no	GO:0042470;GO:0005509;GO:0005576;GO:0033018	melanosome;calcium ion binding;extracellular region;sarcoplasmic reticulum lumen	cellular_component;molecular_function;cellular_component;cellular_component	.	.	.
ENSONIG00000005640 : ENSONIG00000005640 : ENSONIP00000007100.1	ENSONIG00000005640	1.04294	no	up	0.11082	no	ENSONIP00000007100.1	1.00904	no	up	0.895957	no	GO:0030272;GO:0003723;GO:0005524;GO:0009396	5-formyltetrahydrofolate cyclo-ligase activity;RNA binding;ATP binding;folic acid-containing compound biosynthetic process	molecular_function;molecular_function;molecular_function;biological_process	.	.	.
ENSONIG00000009309 : ENSONIG00000009309 : ENSONIP00000052211.1	ENSONIG00000009309	0.956214	no	down	0.899457	no	ENSONIP00000052211.1	1.05691	no	up	0.129636	no	GO:0003723;GO:0005737;GO:0008584;GO:0006355;GO:0003677	RNA binding;cytoplasm;male gonad development;regulation of transcription, DNA-dependent;DNA binding	molecular_function;cellular_component;biological_process;biological_process;molecular_function	ko00230	Purine metabolism	Metabolism
ENSONIG00000002205 : ENSONIG00000002205 : ENSONIP00000002748.2	ENSONIG00000002205	1.35336	no	up	1.37698e-12	yes	ENSONIP00000002748.2	1.16564	no	up	0.0711842	no	.	.	.	.	.	.
ENSONIG00000007586 : ENSONIG00000007586 : ENSONIP00000040343.1	ENSONIG00000007586	0.919061	no	down	0.537867	no	ENSONIP00000040343.1	0.908397	no	down	0.152023	no	GO:0006508;GO:0008270;GO:0004301;GO:0043171;GO:0005737;GO:0008237;GO:0004463;GO:0004177;GO:0019370	proteolysis;zinc ion binding;epoxide hydrolase activity;peptide catabolic process;cytoplasm;metallopeptidase activity;leukotriene-A4 hydrolase activity;aminopeptidase activity;leukotriene biosynthetic process	biological_process;molecular_function;molecular_function;biological_process;cellular_component;molecular_function;molecular_function;molecular_function;biological_process	ko00590	Arachidonic acid metabolism	Metabolism
ENSONIG00000007127 : ENSONIG00000007127 : ENSONIP00000008989.2	ENSONIG00000007127	0.856922	no	down	0.109513	no	ENSONIP00000008989.2	0.90384	no	down	0.0971998	no	GO:0016021;GO:0030660;GO:0015095;GO:0008270;GO:0016409	integral to membrane;Golgi-associated vesicle membrane;magnesium ion transmembrane transporter activity;zinc ion binding;palmitoyltransferase activity	cellular_component;cellular_component;molecular_function;molecular_function;molecular_function	.	.	.
ENSONIG00000016943 : ENSONIG00000016943 : ENSONIP00000046012.1	ENSONIG00000016943	0.513407	no	down	0.000741634	yes	ENSONIP00000046012.1	1.07612	no	up	0.278968	no	GO:0007264;GO:0005525;GO:0016020	small GTPase mediated signal transduction;GTP binding;membrane	biological_process;molecular_function;cellular_component	ko05200;ko04310;ko04662;ko04062;ko04664;ko04360;ko04520;ko05212;ko04650;ko05210;ko04010;ko05416;ko04810;ko04666;ko04370;ko04670;ko04510	Pathways in cancer;Wnt signaling pathway;B cell receptor signaling pathway;Chemokine signaling pathway;Fc epsilon RI signaling pathway;Axon guidance;Adherens junction;Pancreatic cancer;Natural killer cell mediated cytotoxicity;Colorectal cancer;MAPK signaling pathway;Viral myocarditis;Regulation of actin cytoskeleton;Fc gamma R-mediated phagocytosis;VEGF signaling pathway;Leukocyte transendotheli…	Human Diseases;Environmental Information Processing;Organismal Systems;Organismal Systems;Organismal Systems;Organismal Systems;Cellular Processes;Human Diseases;Organismal Systems;Human Diseases;Environmental Information Processing;Human Diseases;Cellular Processes;Organismal Systems;Environmental Information Processing;Organismal Systems;Cellular Processes
ENSONIG00000015007 : ENSONIG00000015007 : ENSONIP00000018895.1	ENSONIG00000015007	1.49352	no	up	4.64955e-10	yes	ENSONIP00000018895.1	0.984458	no	down	0.686934	no	.	.	.	.	.	.
ENSONIG00000000398 : ENSONIG00000000398 : ENSONIP00000000503.2	ENSONIG00000000398	0.934269	no	down	0.821857	no	ENSONIP00000000503.2	0.53192	yes	down	0.28462	no	GO:0030897;GO:0015031;GO:0005083;GO:0031902;GO:0005765	HOPS complex;protein transport;small GTPase regulator activity;late endosome membrane;lysosomal membrane	cellular_component;biological_process;molecular_function;cellular_component;cellular_component	.	.	.
ENSONIG00000016642 : ENSONIG00000016642 : ENSONIP00000020965.2	ENSONIG00000016642	1.39726	no	up	0.00247018	yes	ENSONIP00000020965.2	1.00267	no	up	0.944513	no	GO:0042381;GO:0007155;GO:0005576;GO:0004252;GO:0006508	hemolymph coagulation;cell adhesion;extracellular region;serine-type endopeptidase activity;proteolysis	biological_process;biological_process;cellular_component;molecular_function;biological_process	.	.	.
ENSONIG00000021217 : ENSONIG00000021217 : ENSONIP00000026519.2	ENSONIG00000021217	0.987954	no	down	1	no	ENSONIP00000026519.2	0.843884	no	down	0.510834	no	GO:0000786;GO:0006334;GO:0005634;GO:0003677	nucleosome;nucleosome assembly;nucleus;DNA binding	cellular_component;biological_process;cellular_component;molecular_function	ko05322	Systemic lupus erythematosus	Human Diseases
ENSONIG00000010802 : ENSONIG00000010802 : ENSONIP00000035306.1	ENSONIG00000010802	1.44516	no	up	0.00574051	yes	ENSONIP00000035306.1	0.797184	yes	down	0.337385	no	GO:0008270;GO:0004181;GO:0007155;GO:0006508	zinc ion binding;metallocarboxypeptidase activity;cell adhesion;proteolysis	molecular_function;molecular_function;biological_process;biological_process	.	.	.
ENSONIG00000015468 : ENSONIG00000015468 : ENSONIP00000019460.2	ENSONIG00000015468	0.967028	no	down	0.721598	no	ENSONIP00000019460.2	0.950585	no	down	0.224139	no	GO:0051082;GO:0032438;GO:0005794;GO:0005874;GO:0030117;GO:0006897;GO:0008565;GO:0007021;GO:0019903;GO:0030665;GO:0006886;GO:0005737	unfolded protein binding;melanosome organization;Golgi apparatus;microtubule;membrane coat;endocytosis;protein transporter activity;tubulin complex assembly;protein phosphatase binding;clathrin coated vesicle membrane;intracellular protein transport;cytoplasm	molecular_function;biological_process;cellular_component;cellular_component;cellular_component;biological_process;molecular_function;biological_process;molecular_function;cellular_component;biological_process;cellular_component	ko04142	Lysosome	Cellular Processes
ENSONIG00000018162 : ENSONIG00000018162 : ENSONIP00000033761.1	ENSONIG00000018162	1.11622	no	up	0.0178902	yes	ENSONIP00000033761.1	0.920615	no	down	0.438753	no	GO:0016021;GO:0000139	integral to membrane;Golgi membrane	cellular_component;cellular_component	ko00512	O-Glycan biosynthesis	Metabolism
ENSONIG00000002952 : ENSONIG00000002952 : ENSONIP00000003698.2	ENSONIG00000002952	0.665572	no	down	7.67029e-08	yes	ENSONIP00000003698.2	0.857585	no	down	0.266756	no	GO:0006915	apoptosis	biological_process	ko04530;ko05416	Tight junction;Viral myocarditis	Cellular Processes;Human Diseases
ENSONIG00000003394 : ENSONIG00000003394 : ENSONIP00000063931.1	ENSONIG00000003394	0.823558	no	down	0.15208	no	ENSONIP00000063931.1	0.899652	no	down	0.152834	no	GO:0042256;GO:0005525;GO:0003924;GO:0043022;GO:0003746	mature ribosome assembly;GTP binding;GTPase activity;ribosome binding;translation elongation factor activity	biological_process;molecular_function;molecular_function;molecular_function;molecular_function	.	.	.
ENSONIG00000010058 : ENSONIG00000010058 : ENSONIP00000012649.1	ENSONIG00000010058	0.530807	no	down	2.3876e-07	yes	ENSONIP00000012649.1	0.908397	no	down	0.101506	no	GO:0003779;GO:0005516;GO:0016461;GO:0005524;GO:0003774	actin binding;calmodulin binding;unconventional myosin complex;ATP binding;motor activity	molecular_function;molecular_function;cellular_component;molecular_function;molecular_function	.	.	.
ENSONIG00000003724 : ENSONIG00000003724 : ENSONIP00000004683.2	ENSONIG00000003724	0.996365	no	down	0.437495	no	ENSONIP00000004683.2	0.889764	no	down	0.0640694	no	GO:0019776;GO:0015031;GO:0005737;GO:0043653;GO:0000045;GO:0019777	Atg8 ligase activity;protein transport;cytoplasm;mitochondrial fragmentation involved in apoptosis;autophagic vacuole assembly;Atg12 ligase activity	molecular_function;biological_process;cellular_component;biological_process;biological_process;molecular_function	ko04140	Regulation of autophagy	Cellular Processes
ENSONIG00000010646 : ENSONIG00000010646 : ENSONIP00000013383.1	ENSONIG00000010646	0.722595	no	down	1.63988e-06	yes	ENSONIP00000013383.1	0.925546	no	down	0.0642837	no	GO:0030027;GO:0005856;GO:0006897	lamellipodium;cytoskeleton;endocytosis	cellular_component;cellular_component;biological_process	ko05131;ko05100;ko04530;ko05130	Shigellosis;Bacterial invasion of epithelial cells;Tight junction;Pathogenic Escherichia coli infection	Human Diseases;Human Diseases;Cellular Processes;Human Diseases
ENSONIG00000013638 : ENSONIG00000013638 : ENSONIP00000017154.2	ENSONIG00000013638	1.08155	no	up	0.00900882	yes	ENSONIP00000017154.2	0.789976	yes	down	0.000862283	yes	GO:0005829;GO:0043025;GO:0031175;GO:0030425	cytosol;neuronal cell body;neuron projection development;dendrite	cellular_component;cellular_component;biological_process;cellular_component	.	.	.
ENSONIG00000007261 : ENSONIG00000007261 : ENSONIP00000031227.1	ENSONIG00000007261	0.748762	no	down	0.0103112	yes	ENSONIP00000031227.1	0.893939	no	down	0.0768094	no	GO:0046449;GO:0004871;GO:0006573;GO:0030155;GO:0045588;GO:0006600;GO:0070670;GO:0060397;GO:0019221;GO:0040018;GO:0006105;GO:0033077;GO:0001779;GO:0045885;GO:0007565;GO:0045931;GO:0042448;GO:0045954;GO:0046544;GO:0070672;GO:0001553;GO:0019530;GO:0032825;GO:0006631;GO:0050729;GO:0019218;GO:0032819;GO:0000255;GO:0000979;GO:0046543;GO:0030856;GO:0005509;GO:0006103;GO:0042104;GO:0070669;GO:0006101;GO:…	creatinine metabolic process;signal transducer activity;valine metabolic process;regulation of cell adhesion;positive regulation of gamma-delta T cell differentiation;creatine metabolic process;response to interleukin-4;JAK-STAT cascade involved in growth hormone signaling pathway;cytokine-mediated signaling pathway;positive regulation of multicellular organism growth;succinate metabolic process;…	biological_process;molecular_function;biological_process;biological_process;biological_process;biological_process;biological_process;biological_process;biological_process;biological_process;biological_process;biological_process;biological_process;biological_process;biological_process;biological_process;biological_process;biological_process;biological_process;biological_process;biological_process;…	ko04012;ko04630;ko05220;ko05200;ko04062;ko05221	ErbB signaling pathway;Jak-STAT signaling pathway;Chronic myeloid leukemia;Pathways in cancer;Chemokine signaling pathway;Acute myeloid leukemia	Environmental Information Processing;Environmental Information Processing;Human Diseases;Human Diseases;Organismal Systems;Human Diseases
ENSONIG00000015295 : ENSONIG00000015295 : ENSONIP00000019247.2	ENSONIG00000015295	1.44658	no	up	0.0400309	yes	ENSONIP00000019247.2	1.21811	yes	up	0.165441	no	GO:0005509;GO:0005604;GO:0004859;GO:0008092;GO:0005544	calcium ion binding;basement membrane;phospholipase inhibitor activity;cytoskeletal protein binding;calcium-dependent phospholipid binding	molecular_function;cellular_component;molecular_function;molecular_function;molecular_function	.	.	.
ENSONIG00000010123 : ENSONIG00000010123 : ENSONIP00000012729.2	ENSONIG00000010123	0.580466	no	down	2.51599e-05	yes	ENSONIP00000012729.2	1.14746	no	up	0.180642	no	GO:0005515;GO:0031418;GO:0031543;GO:0005506;GO:0043433;GO:0032364;GO:0008270;GO:0016702;GO:0001666;GO:0005829	protein binding;L-ascorbic acid binding;peptidyl-proline dioxygenase activity;iron ion binding;negative regulation of sequence-specific DNA binding transcription factor activity;oxygen homeostasis;zinc ion binding;oxidoreductase activity, acting on single donors with incorporation of molecular oxygen, incorporation of two atoms of oxygen;response to hypoxia;cytosol	molecular_function;molecular_function;molecular_function;molecular_function;biological_process;biological_process;molecular_function;molecular_function;biological_process;cellular_component	ko05200;ko05211	Pathways in cancer;Renal cell carcinoma	Human Diseases;Human Diseases
ENSONIG00000014402 : ENSONIG00000014402 : ENSONIP00000033051.1	ENSONIG00000014402	1.72294	no	up	5.96829e-07	yes	ENSONIP00000033051.1	1.04778	no	up	0.576027	no	GO:0005509;GO:0008201;GO:0005576	calcium ion binding;heparin binding;extracellular region	molecular_function;molecular_function;cellular_component	.	.	.
ENSONIG00000000553 : ENSONIG00000000553 : ENSONIP00000081464.1	ENSONIG00000000553	0.873663	no	down	0.306819	no	ENSONIP00000081464.1	0.920935	no	down	0.0219294	yes	GO:0005789;GO:0007165;GO:0045321;GO:0016021;GO:0030612;GO:0006888;GO:0015036;GO:0045454;GO:0006950;GO:0045927;GO:0006260;GO:0045893;GO:0008283;GO:0022900;GO:0005624	endoplasmic reticulum membrane;signal transduction;leukocyte activation;integral to membrane;arsenate reductase (thioredoxin) activity;ER to Golgi vesicle-mediated transport;disulfide oxidoreductase activity;cell redox homeostasis;response to stress;positive regulation of growth;DNA replication;positive regulation of transcription, DNA-dependent;cell proliferation;electron transport chain;membran…	cellular_component;biological_process;biological_process;cellular_component;molecular_function;biological_process;molecular_function;biological_process;biological_process;biological_process;biological_process;biological_process;biological_process;biological_process;cellular_component	.	.	.
ENSONIG00000008729 : ENSONIG00000008729 : ENSONIP00000010248.2	ENSONIG00000008729	0.9627	no	down	0.806602	no	ENSONIP00000010248.2	1.01005	no	up	0.836935	no	GO:0045494;GO:0006810;GO:0030154;GO:0045176;GO:0005874;GO:0040023;GO:0048854;GO:0007067;GO:0005815;GO:0051301	photoreceptor cell maintenance;transport;cell differentiation;apical protein localization;microtubule;establishment of nucleus localization;brain morphogenesis;mitosis;microtubule organizing center;cell division	biological_process;biological_process;biological_process;biological_process;cellular_component;biological_process;biological_process;biological_process;cellular_component;biological_process	ko00565	Ether lipid metabolism	Metabolism
ENSONIG00000000062 : ENSONIG00000000062 : ENSONIP00000031934.1	ENSONIG00000000062	1.01636	no	up	0.206139	no	ENSONIP00000031934.1	0.9108	no	down	0.0608656	no	GO:0016831;GO:0005947;GO:0009083;GO:0003863	carboxy-lyase activity;mitochondrial alpha-ketoglutarate dehydrogenase complex;branched chain family amino acid catabolic process;3-methyl-2-oxobutanoate dehydrogenase (2-methylpropanoyl-transferring) activity	molecular_function;cellular_component;biological_process;molecular_function	ko00280	Valine, leucine and isoleucine degradation	Metabolism
ENSONIG00000013978 : ENSONIG00000013978 : ENSONIP00000062645.1	ENSONIG00000013978	0.771511	no	down	0.0160587	yes	ENSONIP00000062645.1	0.98544	no	down	0.85693	no	GO:0006260;GO:0043524;GO:0004864;GO:0006913;GO:0035067;GO:0006337;GO:0008601;GO:0045892;GO:0016071;GO:0005654;GO:0005829;GO:0048471;GO:0006334;GO:0042393;GO:0043234;GO:0005783	DNA replication;negative regulation of neuron apoptosis;protein phosphatase inhibitor activity;nucleocytoplasmic transport;negative regulation of histone acetylation;nucleosome disassembly;protein phosphatase type 2A regulator activity;negative regulation of transcription, DNA-dependent;mRNA metabolic process;nucleoplasm;cytosol;perinuclear region of cytoplasm;nucleosome assembly;histone binding;…	biological_process;biological_process;molecular_function;biological_process;biological_process;biological_process;molecular_function;biological_process;biological_process;cellular_component;cellular_component;cellular_component;biological_process;molecular_function;cellular_component;cellular_component	.	.	.
ENSONIG00000019573 : ENSONIG00000019573 : ENSONIP00000073692.1	ENSONIG00000019573	0.929702	no	down	0.662215	no	ENSONIP00000073692.1	1.01816	no	up	0.752717	no	GO:0005737;GO:0005856;GO:0003779	cytoplasm;cytoskeleton;actin binding	cellular_component;cellular_component;molecular_function	ko04144;ko04145	Endocytosis;Phagosome	Cellular Processes;Cellular Processes
ENSONIG00000009588 : ENSONIG00000009588 : ENSONIP00000012048.2	ENSONIG00000009588	0.932931	no	down	0.750569	no	ENSONIP00000012048.2	0.89665	no	down	0.289711	no	GO:0007049;GO:0007165	cell cycle;signal transduction	biological_process;biological_process	.	.	.
ENSONIG00000008070 : ENSONIG00000008070 : ENSONIP00000010164.2	ENSONIG00000008070	0.959576	no	down	0.885042	no	ENSONIP00000010164.2	0.982491	no	down	0.238771	no	GO:0004361;GO:0050660;GO:0005759	glutaryl-CoA dehydrogenase activity;flavin adenine dinucleotide binding;mitochondrial matrix	molecular_function;molecular_function;cellular_component	ko00380;ko00310;ko00071	Tryptophan metabolism;Lysine degradation;Fatty acid metabolism	Metabolism;Metabolism;Metabolism
ENSONIG00000015846 : ENSONIG00000015846 : ENSONIP00000069459.1	ENSONIG00000015846	0.860287	no	down	0.124479	no	ENSONIP00000069459.1	0.936431	no	down	0.407378	no	GO:0004396;GO:0006096;GO:0005741;GO:0015758;GO:0055085;GO:0005829;GO:0005524;GO:0008637	hexokinase activity;glycolysis;mitochondrial outer membrane;glucose transport;transmembrane transport;cytosol;ATP binding;apoptotic mitochondrial changes	molecular_function;biological_process;cellular_component;biological_process;biological_process;cellular_component;molecular_function;biological_process	ko00520;ko00500;ko00524;ko00521;ko00010;ko00051;ko04930;ko04910;ko00052	Amino sugar and nucleotide sugar metabolism;Starch and sucrose metabolism;Butirosin and neomycin biosynthesis;Streptomycin biosynthesis;Glycolysis / Gluconeogenesis;Fructose and mannose metabolism;Type II diabetes mellitus;Insulin signaling pathway;Galactose metabolism	Metabolism;Metabolism;Metabolism;Metabolism;Metabolism;Metabolism;Human Diseases;Organismal Systems;Metabolism
ENSONIG00000005774 : ENSONIG00000005774 : ENSONIP00000007275.2	ENSONIG00000005774	0.801491	no	down	0.00355005	yes	ENSONIP00000007275.2	0.98314	no	down	0.578282	no	GO:0004298;GO:0005634;GO:0005737;GO:0019773	threonine-type endopeptidase activity;nucleus;cytoplasm;proteasome core complex, alpha-subunit complex	molecular_function;cellular_component;cellular_component;cellular_component	ko03050	Proteasome	Genetic Information Processing
ENSONIG00000009528 : ENSONIG00000009528 : ENSONIP00000011973.1	ENSONIG00000009528	1.03028	no	up	0.167617	no	ENSONIP00000011973.1	1.106	no	up	0.00553694	yes	GO:0031965;GO:0016021;GO:0005730;GO:0005488	nuclear membrane;integral to membrane;nucleolus;binding	cellular_component;cellular_component;cellular_component;molecular_function	.	.	.
ENSONIG00000012975 : ENSONIG00000012975 : ENSONIP00000045305.1	ENSONIG00000012975	1.11852	no	up	0.00470198	yes	ENSONIP00000045305.1	0.937359	no	down	0.160858	no	GO:0006098;GO:0006096;GO:0006094;GO:0004807	pentose-phosphate shunt;glycolysis;gluconeogenesis;triose-phosphate isomerase activity	biological_process;biological_process;biological_process;molecular_function	ko00710;ko00051;ko00010;ko00562	Carbon fixation in photosynthetic organisms;Fructose and mannose metabolism;Glycolysis / Gluconeogenesis;Inositol phosphate metabolism	Metabolism;Metabolism;Metabolism;Metabolism
ENSONIG00000016980 : ENSONIG00000016980 : ENSONIP00000021412.2	ENSONIG00000016980	1.22162	no	up	0.424553	no	ENSONIP00000021412.2	1.28012	yes	up	0.0519478	no	.	.	.	ko04610	Complement and coagulation cascades	Organismal Systems
ENSONIG00000010172 : ENSONIG00000010172 : ENSONIP00000012793.1	ENSONIG00000010172	0.722116	no	down	0.235499	no	ENSONIP00000012793.1	0.587146	yes	down	0.366527	no	GO:0045359;GO:0010008;GO:0032735;GO:0003725;GO:0051092;GO:0034346;GO:0046330;GO:0006954;GO:0032755;GO:0045944;GO:0045078;GO:0005515;GO:0032728;GO:0043123;GO:0032760;GO:0004888;GO:0005789;GO:0051607;GO:0045356;GO:0045080;GO:0016021	positive regulation of interferon-beta biosynthetic process;endosome membrane;positive regulation of interleukin-12 production;double-stranded RNA binding;positive regulation of NF-kappaB transcription factor activity;positive regulation of type III interferon production;positive regulation of JNK cascade;inflammatory response;positive regulation of interleukin-6 production;positive regulation of…	biological_process;cellular_component;biological_process;molecular_function;biological_process;biological_process;biological_process;biological_process;biological_process;biological_process;biological_process;molecular_function;biological_process;biological_process;biological_process;molecular_function;cellular_component;biological_process;biological_process;biological_process;cellular_component	ko04620	Toll-like receptor signaling pathway	Organismal Systems
ENSONIG00000007619 : ENSONIG00000007619 : ENSONIP00000009602.2	ENSONIG00000007619	0.899024	no	down	0.818937	no	ENSONIP00000009602.2	1.149	no	up	0.00285215	yes	GO:0030127;GO:0000139;GO:0006886;GO:0018279;GO:0002474;GO:0048471;GO:0005829;GO:0008270;GO:0048208;GO:0043687;GO:0005789	COPII vesicle coat;Golgi membrane;intracellular protein transport;protein N-linked glycosylation via asparagine;antigen processing and presentation of peptide antigen via MHC class I;perinuclear region of cytoplasm;cytosol;zinc ion binding;COPII vesicle coating;post-translational protein modification;endoplasmic reticulum membrane	cellular_component;cellular_component;biological_process;biological_process;biological_process;cellular_component;cellular_component;molecular_function;biological_process;biological_process;cellular_component	.	.	.
ENSONIG00000019351 : ENSONIG00000019351 : ENSONIP00000059074.1	ENSONIG00000019351	0.913189	no	down	0.77119	no	ENSONIP00000059074.1	1.14859	no	up	0.0352713	yes	GO:0042692;GO:0030168;GO:0005737;GO:0005829;GO:0034142;GO:0005654;GO:0045087;GO:0034138;GO:0042770;GO:0006935;GO:0005515;GO:0034130;GO:0006928;GO:2000379;GO:0048011;GO:0006950;GO:0005634;GO:0034134;GO:0051090;GO:0071479;GO:0004708;GO:0016071;GO:0004707;GO:0051149;GO:0051403;GO:0002756;GO:0090400;GO:0002755;GO:0007265;GO:0000187;GO:0008063;GO:0005524;GO:0048010	muscle cell differentiation;platelet activation;cytoplasm;cytosol;toll-like receptor 4 signaling pathway;nucleoplasm;innate immune response;toll-like receptor 3 signaling pathway;signal transduction in response to DNA damage;chemotaxis;protein binding;toll-like receptor 1 signaling pathway;cellular component movement;positive regulation of reactive oxygen species metabolic process;nerve growth fa…	biological_process;biological_process;cellular_component;cellular_component;biological_process;cellular_component;biological_process;biological_process;biological_process;biological_process;molecular_function;biological_process;biological_process;biological_process;biological_process;biological_process;cellular_component;biological_process;biological_process;biological_process;molecular_function;…	ko05014;ko05131;ko05142;ko04011;ko04620;ko04664;ko04660;ko04670;ko04370;ko05140;ko04912;ko04914;ko04621;ko04010;ko05120;ko04622;ko04722	Amyotrophic lateral sclerosis (ALS;Shigellosis;Chagas disease;MAPK signaling pathway - yeast;Toll-like receptor signaling pathway;Fc epsilon RI signaling pathway;T cell receptor signaling pathway;Leukocyte transendothelial migration;VEGF signaling pathway;Leishmaniasis;GnRH signaling pathway;Progesterone-mediated oocyte maturation;NOD-like receptor signaling pathway;MAPK signaling pathway;Epithel…	Human Diseases;Human Diseases;Human Diseases;Environmental Information Processing;Organismal Systems;Organismal Systems;Organismal Systems;Organismal Systems;Environmental Information Processing;Human Diseases;Organismal Systems;Organismal Systems;Organismal Systems;Environmental Information Processing;Human Diseases;Organismal Systems;Organismal Systems
ENSONIG00000000854 : ENSONIG00000000854 : ENSONIP00000001083.1	ENSONIG00000000854	0.970058	no	down	0.750887	no	ENSONIP00000001083.1	1.01478	no	up	0.886902	no	GO:0006412;GO:0003735;GO:0005840	translation;structural constituent of ribosome;ribosome	biological_process;molecular_function;cellular_component	ko03010	Ribosome	Genetic Information Processing
ENSONIG00000011461 : ENSONIG00000011461 : ENSONIP00000014423.1	ENSONIG00000011461	0.872618	no	down	0.423466	no	ENSONIP00000014423.1	0.936733	no	down	0.0623656	no	GO:0005737;GO:0016042;GO:0003847	cytoplasm;lipid catabolic process;1-alkyl-2-acetylglycerophosphocholine esterase activity	cellular_component;biological_process;molecular_function	ko00565	Ether lipid metabolism	Metabolism
ENSONIG00000008650 : ENSONIG00000008650 : ENSONIP00000010875.2	ENSONIG00000008650	0.547735	no	down	6.52794e-07	yes	ENSONIP00000010875.2	0.896051	no	down	0.015167	yes	GO:0016670;GO:0030328;GO:0005576	oxidoreductase activity, acting on a sulfur group of donors, oxygen as acceptor;prenylcysteine catabolic process;extracellular region	molecular_function;biological_process;cellular_component	.	.	.
ENSONIG00000017074 : ENSONIG00000017074 : ENSONIP00000055178.1	ENSONIG00000017074	0.844768	no	down	0.412854	no	ENSONIP00000055178.1	0.906866	no	down	0.321556	no	GO:0046872	metal ion binding	molecular_function	ko04145;ko04144	Phagosome;Endocytosis	Cellular Processes;Cellular Processes
ENSONIG00000019317 : ENSONIG00000019317 : ENSONIP00000024314.1	ENSONIG00000019317	1.06076	no	up	0.0471454	yes	ENSONIP00000024314.1	0.939864	no	down	0.0591375	no	GO:0004298;GO:0005634;GO:0005737;GO:0019773	threonine-type endopeptidase activity;nucleus;cytoplasm;proteasome core complex, alpha-subunit complex	molecular_function;cellular_component;cellular_component;cellular_component	ko03050	Proteasome	Genetic Information Processing
ENSONIG00000000227 : ENSONIG00000000227 : ENSONIP00000000292.2	ENSONIG00000000227	1.10279	no	up	0.00453316	yes	ENSONIP00000000292.2	1.04116	no	up	0.338719	no	GO:0008270;GO:0004842	zinc ion binding;ubiquitin-protein ligase activity	molecular_function;molecular_function	.	.	.
ENSONIG00000004238 : ENSONIG00000004238 : ENSONIP00000075336.1	ENSONIG00000004238	1.31772	no	up	1.94681e-06	yes	ENSONIP00000075336.1	1.23048	yes	up	0.0572305	no	GO:0005615;GO:0005509;GO:0007165;GO:0005604	extracellular space;calcium ion binding;signal transduction;basement membrane	cellular_component;molecular_function;biological_process;cellular_component	.	.	.
ENSONIG00000014498 : ENSONIG00000014498 : ENSONIP00000042585.1	ENSONIG00000014498	0.871209	no	down	0.104131	no	ENSONIP00000042585.1	0.976936	no	down	0.566403	no	GO:0015269;GO:0005635;GO:0004722;GO:0005737;GO:0004725	calcium-activated potassium channel activity;nuclear envelope;protein serine/threonine phosphatase activity;cytoplasm;protein tyrosine phosphatase activity	molecular_function;cellular_component;molecular_function;cellular_component;molecular_function	ko00740;ko00730;ko00051	Riboflavin metabolism;Thiamine metabolism;Fructose and mannose metabolism	Metabolism;Metabolism;Metabolism
ENSONIG00000007587 : ENSONIG00000007587 : ENSONIP00000009566.1	ENSONIG00000007587	1.07591	no	up	0.0222484	yes	ENSONIP00000009566.1	0.932367	no	down	0.419706	no	GO:0000460;GO:0005515;GO:0003676;GO:0071013;GO:0008026;GO:0000398;GO:0005524;GO:0005730	maturation of 5.8S rRNA;protein binding;nucleic acid binding;catalytic step 2 spliceosome;ATP-dependent helicase activity;nuclear mRNA splicing, via spliceosome;ATP binding;nucleolus	biological_process;molecular_function;molecular_function;cellular_component;molecular_function;biological_process;molecular_function;cellular_component	.	.	.
ENSONIG00000008817 : ENSONIG00000008817 : ENSONIP00000081622.1	ENSONIG00000008817	0.649407	no	down	0.000336432	yes	ENSONIP00000081622.1	0.89665	no	down	0.180183	no	.	.	.	.	.	.
ENSONIG00000019067 : ENSONIG00000019067 : ENSONIP00000072597.1	ENSONIG00000019067	0.659465	no	down	0.00469949	yes	ENSONIP00000072597.1	0.89665	no	down	0.0474098	yes	GO:0019901;GO:0006633;GO:0006950;GO:0004679;GO:0016208;GO:0043531;GO:0031588;GO:0051291;GO:0005654;GO:0005524;GO:0050790	protein kinase binding;fatty acid biosynthetic process;response to stress;AMP-activated protein kinase activity;AMP binding;ADP binding;AMP-activated protein kinase complex;protein heterooligomerization;nucleoplasm;ATP binding;regulation of catalytic activity	molecular_function;biological_process;biological_process;molecular_function;molecular_function;molecular_function;cellular_component;biological_process;cellular_component;molecular_function;biological_process	ko05410;ko04910;ko04920	Hypertrophic cardiomyopathy (HCM;Insulin signaling pathway;Adipocytokine signaling pathway	Human Diseases;Organismal Systems;Organismal Systems
ENSONIG00000010025 : ENSONIG00000010025 : ENSONIP00000075252.1	ENSONIG00000010025	1.13425	no	up	0.00144506	yes	ENSONIP00000075252.1	0.995012	no	down	0.839661	no	GO:0000777;GO:0051028;GO:0005515;GO:0015758;GO:0006434;GO:0005524;GO:0010827;GO:0005737;GO:0006606;GO:0004828;GO:0007094;GO:0031965;GO:0005975;GO:0005654;GO:0016032;GO:0005643;GO:0055085	condensed chromosome kinetochore;mRNA transport;protein binding;glucose transport;seryl-tRNA aminoacylation;ATP binding;regulation of glucose transport;cytoplasm;protein import into nucleus;serine-tRNA ligase activity;mitotic cell cycle spindle assembly checkpoint;nuclear membrane;carbohydrate metabolic process;nucleoplasm;viral reproduction;nuclear pore;transmembrane transport	cellular_component;biological_process;molecular_function;biological_process;biological_process;molecular_function;biological_process;cellular_component;biological_process;molecular_function;biological_process;cellular_component;biological_process;cellular_component;biological_process;cellular_component;biological_process	ko05200;ko04011;ko05216	Pathways in cancer;MAPK signaling pathway - yeast;Thyroid cancer	Human Diseases;Environmental Information Processing;Human Diseases
ENSONIG00000016333 : ENSONIG00000016333 : ENSONIP00000020566.1	ENSONIG00000016333	0.947182	no	down	0.969397	no	ENSONIP00000020566.1	1.07288	no	up	0.213666	no	GO:0005507;GO:0007155;GO:0007596;GO:0005576	copper ion binding;cell adhesion;blood coagulation;extracellular region	molecular_function;biological_process;biological_process;cellular_component	ko04610	Complement and coagulation cascades	Organismal Systems
ENSONIG00000001687 : ENSONIG00000001687 : ENSONIP00000002113.1	ENSONIG00000001687	0.961067	no	down	0.850875	no	ENSONIP00000002113.1	0.899335	no	down	0.0749833	no	GO:0022900;GO:0070469;GO:0005743;GO:0006810;GO:0016021	electron transport chain;respiratory chain;mitochondrial inner membrane;transport;integral to membrane	biological_process;cellular_component;cellular_component;biological_process;cellular_component	ko05016;ko05010;ko05012;ko00190	Huntington's disease;Alzheimer's disease;Parkinson's disease;Oxidative phosphorylation	Human Diseases;Human Diseases;Human Diseases;Metabolism
ENSONIG00000011791 : ENSONIG00000011791 : ENSONIP00000044996.1	ENSONIG00000011791	0.00171815	yes	down	1	no	ENSONIP00000044996.1	0.843059	no	down	0.0370224	yes	.	.	.	.	.	.
ENSONIG00000004218 : ENSONIG00000004218 : ENSONIP00000005308.2	ENSONIG00000004218	1	no	down	1	no	ENSONIP00000005308.2	1.04499	no	up	0.542816	no	.	.	.	.	.	.
ENSONIG00000010834 : ENSONIG00000010834 : ENSONIP00000013625.2	ENSONIG00000010834	1.55735	no	up	9.84624e-12	yes	ENSONIP00000013625.2	1.07866	no	up	0.0207191	yes	.	.	.	.	.	.
ENSONIG00000015639 : ENSONIG00000015639 : ENSONIP00000019684.2	ENSONIG00000015639	1.02601	no	up	0.135292	no	ENSONIP00000019684.2	0.974984	no	down	0.260853	no	GO:0006351;GO:0005634;GO:0006936;GO:0006355;GO:0003779;GO:0005813;GO:0007275	transcription, DNA-dependent;nucleus;muscle contraction;regulation of transcription, DNA-dependent;actin binding;centrosome;multicellular organismal development	biological_process;cellular_component;biological_process;biological_process;molecular_function;cellular_component;biological_process	ko04080;ko04360	Neuroactive ligand-receptor interaction;Axon guidance	Environmental Information Processing;Organismal Systems
ENSONIG00000002346 : ENSONIG00000002346 : ENSONIP00000002934.1	ENSONIG00000002346	0.790557	no	down	0.0304891	yes	ENSONIP00000002934.1	0.978562	no	down	0.689398	no	GO:0015031;GO:0007264;GO:0005794;GO:0005525;GO:0005886;GO:0048471	protein transport;small GTPase mediated signal transduction;Golgi apparatus;GTP binding;plasma membrane;perinuclear region of cytoplasm	biological_process;biological_process;cellular_component;molecular_function;cellular_component;cellular_component	.	.	.
ENSONIG00000007552 : ENSONIG00000007552 : ENSONIP00000058913.1	ENSONIG00000007552	1.04762	no	up	0.271076	no	ENSONIP00000058913.1	0.997337	no	down	0.976521	no	GO:0003723;GO:0000166	RNA binding;nucleotide binding	molecular_function;molecular_function	ko03040	Spliceosome	Genetic Information Processing
ENSONIG00000010599 : ENSONIG00000010599 : ENSONIP00000076241.1	ENSONIG00000010599	0.813706	no	down	0.0766015	no	ENSONIP00000076241.1	0.948993	no	down	0.369039	no	.	.	.	.	.	.
ENSONIG00000012942 : ENSONIG00000012942 : ENSONIP00000016280.2	ENSONIG00000012942	0.387834	yes	down	1	no	ENSONIP00000016280.2	0.752044	yes	down	0.00640407	yes	GO:0046872;GO:0003810;GO:0005737;GO:0018149;GO:0007596;GO:0005576	metal ion binding;protein-glutamine gamma-glutamyltransferase activity;cytoplasm;peptide cross-linking;blood coagulation;extracellular region	molecular_function;molecular_function;cellular_component;biological_process;biological_process;cellular_component	ko04610	Complement and coagulation cascades	Organismal Systems
ENSONIG00000002267 : ENSONIG00000002267 : ENSONIP00000002830.1	ENSONIG00000002267	1.07426	no	up	0.0508459	no	ENSONIP00000002830.1	0.931745	no	down	0.201405	no	.	.	.	.	.	.
ENSONIG00000018954 : ENSONIG00000018954 : ENSONIP00000023865.1	ENSONIG00000018954	1.31418	no	up	4.09116e-09	yes	ENSONIP00000023865.1	0.869741	no	down	0.1703	no	GO:0006351;GO:0043565;GO:0045893;GO:0030529;GO:0005737;GO:0003723	transcription, DNA-dependent;sequence-specific DNA binding;positive regulation of transcription, DNA-dependent;ribonucleoprotein complex;cytoplasm;RNA binding	biological_process;molecular_function;biological_process;cellular_component;cellular_component;molecular_function	.	.	.
ENSONIG00000013500 : ENSONIG00000013500 : ENSONIP00000016975.2	ENSONIG00000013500	1.02916	no	up	0.12542	no	ENSONIP00000016975.2	0.99435	no	down	0.679298	no	GO:0003723;GO:0005634;GO:0005524;GO:0004004	RNA binding;nucleus;ATP binding;ATP-dependent RNA helicase activity	molecular_function;cellular_component;molecular_function;molecular_function	ko00230	Purine metabolism	Metabolism
ENSONIG00000013661 : ENSONIG00000013661 : ENSONIP00000060373.1	ENSONIG00000013661	1.00118	no	up	0.791416	no	ENSONIP00000060373.1	1.15208	no	up	0.377768	no	GO:0008270	zinc ion binding	molecular_function	ko04510	Focal adhesion	Cellular Processes
ENSONIG00000013628 : ENSONIG00000013628 : ENSONIP00000017140.2	ENSONIG00000013628	1.03059	no	up	0.186549	no	ENSONIP00000017140.2	0.943635	no	down	0.177153	no	GO:0004298;GO:0005634;GO:0005839;GO:0005737	threonine-type endopeptidase activity;nucleus;proteasome core complex;cytoplasm	molecular_function;cellular_component;cellular_component;cellular_component	ko03050	Proteasome	Genetic Information Processing
ENSONIG00000001933 : ENSONIG00000001933 : ENSONIP00000047233.1	ENSONIG00000001933	0.83692	no	down	0.041601	yes	ENSONIP00000047233.1	1.10196	no	up	0.568699	no	GO:0005905;GO:0014069;GO:0019901;GO:0032403;GO:0030054;GO:0005634;GO:0005886;GO:0045334;GO:0005525;GO:0003924;GO:0005874;GO:0045211	coated pit;postsynaptic density;protein kinase binding;protein complex binding;cell junction;nucleus;plasma membrane;clathrin-coated endocytic vesicle;GTP binding;GTPase activity;microtubule;postsynaptic membrane	cellular_component;cellular_component;molecular_function;molecular_function;cellular_component;cellular_component;cellular_component;cellular_component;molecular_function;molecular_function;cellular_component;cellular_component	ko04144;ko04666;ko05100	Endocytosis;Fc gamma R-mediated phagocytosis;Bacterial invasion of epithelial cells	Cellular Processes;Organismal Systems;Human Diseases
ENSONIG00000002961 : ENSONIG00000002961 : ENSONIP00000003710.1	ENSONIG00000002961	0.875583	no	down	0.4024	no	ENSONIP00000003710.1	0.891551	no	down	0.00861835	yes	GO:0046777;GO:0051262;GO:0030335;GO:0005792;GO:0005010;GO:0008286;GO:0046872;GO:0005887;GO:0043559;GO:0006955;GO:0014065;GO:0043560;GO:0042802;GO:0008284;GO:0045740;GO:0043548;GO:0048015;GO:0005524;GO:0005158;GO:0031994	protein autophosphorylation;protein tetramerization;positive regulation of cell migration;microsome;insulin-like growth factor-activated receptor activity;insulin receptor signaling pathway;metal ion binding;integral to plasma membrane;insulin binding;immune response;phosphatidylinositol 3-kinase cascade;insulin receptor substrate binding;identical protein binding;positive regulation of cell prol…	biological_process;biological_process;biological_process;cellular_component;molecular_function;biological_process;molecular_function;cellular_component;molecular_function;biological_process;biological_process;molecular_function;molecular_function;biological_process;biological_process;molecular_function;biological_process;molecular_function;molecular_function;molecular_function	ko04144;ko05214;ko05215;ko05200;ko05218;ko04730;ko04520;ko04510;ko04914;ko04114	Endocytosis;Glioma;Prostate cancer;Pathways in cancer;Melanoma;Long-term depression;Adherens junction;Focal adhesion;Progesterone-mediated oocyte maturation;Oocyte meiosis	Cellular Processes;Human Diseases;Human Diseases;Human Diseases;Human Diseases;Organismal Systems;Cellular Processes;Cellular Processes;Organismal Systems;Cellular Processes
ENSONIG00000013150 : ENSONIG00000013150 : ENSONIP00000016541.1	ENSONIG00000013150	1.12595	no	up	0.103351	no	ENSONIP00000016541.1	0.898134	no	down	0.519518	no	GO:0016055;GO:0007275;GO:0030154;GO:0047134;GO:0005634;GO:0016209;GO:0005829	Wnt receptor signaling pathway;multicellular organismal development;cell differentiation;protein-disulfide reductase activity;nucleus;antioxidant activity;cytosol	biological_process;biological_process;biological_process;molecular_function;cellular_component;molecular_function;cellular_component	.	.	.
ENSONIG00000018867 : ENSONIG00000018867 : ENSONIP00000023757.2	ENSONIG00000018867	1.50529	no	up	8.24054e-14	yes	ENSONIP00000023757.2	0.822047	yes	down	0.0709182	no	GO:0048251;GO:0005524;GO:0003779;GO:0005516;GO:0008307;GO:0032982;GO:0030241;GO:0006939;GO:0048739;GO:0030016	elastic fiber assembly;ATP binding;actin binding;calmodulin binding;structural constituent of muscle;myosin filament;skeletal muscle myosin thick filament assembly;smooth muscle contraction;cardiac muscle fiber development;myofibril	biological_process;molecular_function;molecular_function;molecular_function;molecular_function;cellular_component;biological_process;biological_process;biological_process;cellular_component	ko04530;ko05416	Tight junction;Viral myocarditis	Cellular Processes;Human Diseases
ENSONIG00000008376 : ENSONIG00000008376 : ENSONIP00000010530.2	ENSONIG00000008376	0.82174	no	down	0.183003	no	ENSONIP00000010530.2	0.995013	no	down	0.929665	no	GO:0008270;GO:0030017	zinc ion binding;sarcomere	molecular_function;cellular_component	.	.	.
ENSONIG00000004037 : ENSONIG00000004037 : ENSONIP00000005089.2	ENSONIG00000004037	0.908039	no	down	0.441849	no	ENSONIP00000005089.2	0.973035	no	down	0.195256	no	GO:0010807;GO:0006886;GO:0070044;GO:0005622;GO:0019905;GO:0007420;GO:0035494;GO:0030182;GO:0045176;GO:0035249	regulation of synaptic vesicle priming;intracellular protein transport;synaptobrevin 2-SNAP-25-syntaxin-1a complex;intracellular;syntaxin binding;brain development;SNARE complex disassembly;neuron differentiation;apical protein localization;synaptic transmission, glutamatergic	biological_process;biological_process;cellular_component;cellular_component;molecular_function;biological_process;biological_process;biological_process;biological_process;biological_process	.	.	.
ENSONIG00000009362 : ENSONIG00000009362 : ENSONIP00000044708.1	ENSONIG00000009362	0.964993	no	down	0.765196	no	ENSONIP00000044708.1	1.05516	no	up	0.048322	yes	GO:0005737;GO:0005634;GO:0030529	cytoplasm;nucleus;ribonucleoprotein complex	cellular_component;cellular_component;cellular_component	ko04510;ko04512	Focal adhesion;ECM-receptor interaction	Cellular Processes;Environmental Information Processing
ENSONIG00000008062 : ENSONIG00000008062 : ENSONIP00000074974.1	ENSONIG00000008062	0.946991	no	down	0.955767	no	ENSONIP00000074974.1	0.903553	no	down	0.00848588	yes	GO:0031072;GO:0006351;GO:0043130;GO:0005829;GO:0003682;GO:0042393;GO:0003677;GO:0005634;GO:0045893;GO:0016568	heat shock protein binding;transcription, DNA-dependent;ubiquitin binding;cytosol;chromatin binding;histone binding;DNA binding;nucleus;positive regulation of transcription, DNA-dependent;chromatin modification	molecular_function;biological_process;molecular_function;cellular_component;molecular_function;molecular_function;molecular_function;cellular_component;biological_process;biological_process	.	.	.
ENSONIG00000018637 : ENSONIG00000018637 : ENSONIP00000023457.1	ENSONIG00000018637	0.998458	no	down	0.363021	no	ENSONIP00000023457.1	0.924631	no	down	0.751021	no	GO:0005789;GO:0005792;GO:0002540;GO:0016021;GO:0004364;GO:0004602;GO:0019370	endoplasmic reticulum membrane;microsome;leukotriene production involved in inflammatory response;integral to membrane;glutathione transferase activity;glutathione peroxidase activity;leukotriene biosynthetic process	cellular_component;cellular_component;biological_process;cellular_component;molecular_function;molecular_function;biological_process	ko00980;ko00982;ko00480	Metabolism of xenobiotics by cytochrome P450;Drug metabolism - cytochrome P450;Glutathione metabolism	Metabolism;Metabolism;Metabolism
ENSONIG00000013958 : ENSONIG00000013958 : ENSONIP00000017543.1	ENSONIG00000013958	1.52046	no	up	3.99198e-06	yes	ENSONIP00000017543.1	0.977265	no	down	0.730341	no	GO:0003713;GO:0006355;GO:0006351;GO:0003677;GO:0005634	transcription coactivator activity;regulation of transcription, DNA-dependent;transcription, DNA-dependent;DNA binding;nucleus	molecular_function;biological_process;biological_process;molecular_function;cellular_component	.	.	.
ENSONIG00000015456 : ENSONIG00000015456 : ENSONIP00000054673.1	ENSONIG00000015456	0.81921	no	down	0.152303	no	ENSONIP00000054673.1	0.653804	yes	down	0.00202325	yes	GO:0005737;GO:0008146	cytoplasm;sulfotransferase activity	cellular_component;molecular_function	.	.	.
ENSONIG00000006998 : ENSONIG00000006998 : ENSONIP00000008825.2	ENSONIG00000006998	0.990822	no	down	0.53804	no	ENSONIP00000008825.2	0.842752	no	down	0.0838055	no	GO:0005886;GO:0030496;GO:0005095;GO:0005634;GO:0019903;GO:0005099;GO:0050796;GO:0005737;GO:0005516;GO:0005884;GO:0006112;GO:0007264	plasma membrane;midbody;GTPase inhibitor activity;nucleus;protein phosphatase binding;Ras GTPase activator activity;regulation of insulin secretion;cytoplasm;calmodulin binding;actin filament;energy reserve metabolic process;small GTPase mediated signal transduction	cellular_component;cellular_component;molecular_function;cellular_component;molecular_function;molecular_function;biological_process;cellular_component;molecular_function;cellular_component;biological_process;biological_process	ko04810	Regulation of actin cytoskeleton	Cellular Processes
ENSONIG00000017185 : ENSONIG00000017185 : ENSONIP00000041880.1	ENSONIG00000017185	1.38767	no	up	3.71279e-09	yes	ENSONIP00000041880.1	0.915709	no	down	0.101737	no	.	.	.	ko00750	Vitamin B6 metabolism	Metabolism
ENSONIG00000012227 : ENSONIG00000012227 : ENSONIP00000015402.2	ENSONIG00000012227	1	no	down	1	no	ENSONIP00000015402.2	1.09605	no	up	0.334582	no	GO:0006508;GO:0042730;GO:0004181;GO:0007596;GO:0008270;GO:0005576	proteolysis;fibrinolysis;metallocarboxypeptidase activity;blood coagulation;zinc ion binding;extracellular region	biological_process;biological_process;molecular_function;biological_process;molecular_function;cellular_component	ko04610	Complement and coagulation cascades	Organismal Systems
ENSONIG00000016991 : ENSONIG00000016991 : ENSONIP00000035259.1	ENSONIG00000016991	1.15837	no	up	0.0070577	yes	ENSONIP00000035259.1	0.946788	no	down	0.0585893	no	GO:0005524;GO:0004485;GO:0005759	ATP binding;methylcrotonoyl-CoA carboxylase activity;mitochondrial matrix	molecular_function;molecular_function;cellular_component	ko00280	Valine, leucine and isoleucine degradation	Metabolism
ENSONIG00000016766 : ENSONIG00000016766 : ENSONIP00000021120.2	ENSONIG00000016766	0.137824	yes	down	5.9958e-45	yes	ENSONIP00000021120.2	0.973035	no	down	0.132486	no	GO:0004725;GO:0005789;GO:0031532;GO:0030100;GO:0005769;GO:0009966	protein tyrosine phosphatase activity;endoplasmic reticulum membrane;actin cytoskeleton reorganization;regulation of endocytosis;early endosome;regulation of signal transduction	molecular_function;cellular_component;biological_process;biological_process;cellular_component;biological_process	ko04910;ko04520	Insulin signaling pathway;Adherens junction	Organismal Systems;Cellular Processes
ENSONIG00000016523 : ENSONIG00000016523 : ENSONIP00000020808.2	ENSONIG00000016523	1.237	no	up	0.0042691	yes	ENSONIP00000020808.2	0.909004	no	down	0.637495	no	GO:0006355;GO:0005634;GO:0003677;GO:0006351;GO:0006417;GO:0003723	regulation of transcription, DNA-dependent;nucleus;DNA binding;transcription, DNA-dependent;regulation of translation;RNA binding	biological_process;cellular_component;molecular_function;biological_process;biological_process;molecular_function	.	.	.
ENSONIG00000004346 : ENSONIG00000004346 : ENSONIP00000049343.1	ENSONIG00000004346	0.903605	no	down	0.401123	no	ENSONIP00000049343.1	0.960784	no	down	0.458424	no	GO:0003755;GO:0000236;GO:0006457;GO:0051028;GO:0006606;GO:0016925;GO:0010827;GO:0016032;GO:0008270;GO:0005643;GO:0055085;GO:0005829;GO:0015758;GO:0008536;GO:0005975	peptidyl-prolyl cis-trans isomerase activity;mitotic prometaphase;protein folding;mRNA transport;protein import into nucleus;protein sumoylation;regulation of glucose transport;viral reproduction;zinc ion binding;nuclear pore;transmembrane transport;cytosol;glucose transport;Ran GTPase binding;carbohydrate metabolic process	molecular_function;biological_process;biological_process;biological_process;biological_process;biological_process;biological_process;biological_process;molecular_function;cellular_component;biological_process;cellular_component;biological_process;molecular_function;biological_process	.	.	.
ENSONIG00000009510 : ENSONIG00000009510 : ENSONIP00000052542.1	ENSONIG00000009510	0.813457	no	down	0.00300457	yes	ENSONIP00000052542.1	0.864512	no	down	0.039909	yes	GO:0007568;GO:0048545;GO:0043243;GO:0046326;GO:0060051;GO:0045862;GO:0004402;GO:0070265;GO:0005737;GO:0060124;GO:0005634;GO:0010616;GO:0031343;GO:0032024;GO:0051054;GO:0051901;GO:0004563;GO:0010524;GO:0006612;GO:0006044;GO:0046060	aging;response to steroid hormone stimulus;positive regulation of protein complex disassembly;positive regulation of glucose import;negative regulation of protein glycosylation;positive regulation of proteolysis;histone acetyltransferase activity;necrotic cell death;cytoplasm;positive regulation of growth hormone secretion;nucleus;negative regulation of cardiac muscle adaptation;positive regulati…	biological_process;biological_process;biological_process;biological_process;biological_process;biological_process;molecular_function;biological_process;cellular_component;biological_process;cellular_component;biological_process;biological_process;biological_process;biological_process;biological_process;molecular_function;biological_process;biological_process;biological_process;biological_process	ko00531	Glycosaminoglycan degradation	Metabolism
ENSONIG00000001384 : ENSONIG00000001384 : ENSONIP00000001746.1	ENSONIG00000001384	0.90229	no	down	0.636337	no	ENSONIP00000001746.1	0.967541	no	down	0.66246	no	GO:0005829;GO:0030676;GO:0008270;GO:0007026;GO:0005794;GO:0005923;GO:0000902;GO:0007015;GO:0006886;GO:0051092;GO:0005819;GO:0048365;GO:0042127;GO:0005874;GO:0007264;GO:0035023;GO:0048011;GO:0051301;GO:0032587;GO:0006915;GO:0007067;GO:0008017	cytosol;Rac guanyl-nucleotide exchange factor activity;zinc ion binding;negative regulation of microtubule depolymerization;Golgi apparatus;tight junction;cell morphogenesis;actin filament organization;intracellular protein transport;positive regulation of NF-kappaB transcription factor activity;spindle;Rac GTPase binding;regulation of cell proliferation;microtubule;small GTPase mediated signal t…	cellular_component;molecular_function;molecular_function;biological_process;cellular_component;cellular_component;biological_process;biological_process;biological_process;biological_process;cellular_component;molecular_function;biological_process;cellular_component;biological_process;biological_process;biological_process;biological_process;cellular_component;biological_process;biological_process;…	ko04062	Chemokine signaling pathway	Organismal Systems
ENSONIG00000007546 : ENSONIG00000007546 : ENSONIP00000067213.1	ENSONIG00000007546	1.58869	no	up	0.0149357	yes	ENSONIP00000067213.1	1.01039	no	up	0.821956	no	GO:0005737;GO:0060391;GO:0005515;GO:0005634;GO:0010862;GO:0006355;GO:0003713;GO:0006396;GO:0008143;GO:0000166;GO:0006351	cytoplasm;positive regulation of SMAD protein import into nucleus;protein binding;nucleus;positive regulation of pathway-restricted SMAD protein phosphorylation;regulation of transcription, DNA-dependent;transcription coactivator activity;RNA processing;poly(A) RNA binding;nucleotide binding;transcription, DNA-dependent	cellular_component;biological_process;molecular_function;cellular_component;biological_process;biological_process;molecular_function;biological_process;molecular_function;molecular_function;biological_process	.	.	.
ENSONIG00000010553 : ENSONIG00000010553 : ENSONIP00000013269.2	ENSONIG00000010553	0.82194	no	down	0.0051076	yes	ENSONIP00000013269.2	1.15636	no	up	0.00294687	yes	GO:0005576;GO:0060271;GO:0005856;GO:0051693;GO:0003779;GO:0005737	extracellular region;cilium morphogenesis;cytoskeleton;actin filament capping;actin binding;cytoplasm	cellular_component;biological_process;cellular_component;biological_process;molecular_function;cellular_component	ko04810;ko04666	Regulation of actin cytoskeleton;Fc gamma R-mediated phagocytosis	Cellular Processes;Organismal Systems
ENSONIG00000013044 : ENSONIG00000013044 : ENSONIP00000032997.1	ENSONIG00000013044	1.1551	no	up	0.00121342	yes	ENSONIP00000032997.1	1.0141	no	up	0.783602	no	GO:0005622;GO:0002456;GO:0005198;GO:0005615;GO:0005525;GO:0007165;GO:0006974	intracellular;T cell mediated immunity;structural molecule activity;extracellular space;GTP binding;signal transduction;response to DNA damage stimulus	cellular_component;biological_process;molecular_function;cellular_component;molecular_function;biological_process;biological_process	.	.	.
ENSONIG00000013348 : ENSONIG00000013348 : ENSONIP00000016782.2	ENSONIG00000013348	0.88214	no	down	0.311236	no	ENSONIP00000016782.2	1.23048	yes	up	0.0585973	no	GO:0005509;GO:0005201;GO:0005578	calcium ion binding;extracellular matrix structural constituent;proteinaceous extracellular matrix	molecular_function;molecular_function;cellular_component	.	.	.
ENSONIG00000001848 : ENSONIG00000001848 : ENSONIP00000002307.2	ENSONIG00000001848	0.879023	no	down	0.68068	no	ENSONIP00000002307.2	0.951529	no	down	0.591634	no	.	.	.	ko00260	Glycine, serine and threonine metabolism	Metabolism
ENSONIG00000020377 : ENSONIG00000020377 : ENSONIP00000025679.2	ENSONIG00000020377	0.870735	no	down	0.383239	no	ENSONIP00000025679.2	1.0601	no	up	0.592897	no	GO:0010859;GO:0005515	calcium-dependent cysteine-type endopeptidase inhibitor activity;protein binding	molecular_function;molecular_function	.	.	.
ENSONIG00000001768 : ENSONIG00000001768 : ENSONIP00000002214.1	ENSONIG00000001768	0.986496	no	down	0.583297	no	ENSONIP00000002214.1	0.949951	no	down	0.154422	no	GO:0005777;GO:0051920;GO:0004601;GO:0005739	peroxisome;peroxiredoxin activity;peroxidase activity;mitochondrion	cellular_component;molecular_function;molecular_function;cellular_component	ko04146	Peroxisome	Cellular Processes
ENSONIG00000000700 : ENSONIG00000000700 : ENSONIP00000000883.2	ENSONIG00000000700	0.737089	no	down	0.113041	no	ENSONIP00000000883.2	0.99071	no	down	0.801265	no	GO:0005158;GO:0007265;GO:0005057;GO:0007169;GO:0000165;GO:0005068	insulin receptor binding;Ras protein signal transduction;receptor signaling protein activity;transmembrane receptor protein tyrosine kinase signaling pathway;MAPKKK cascade;transmembrane receptor protein tyrosine kinase adaptor activity	molecular_function;biological_process;molecular_function;biological_process;biological_process;molecular_function	.	.	.
ENSONIG00000012207 : ENSONIG00000012207 : ENSONIP00000043253.1	ENSONIG00000012207	0.789497	no	down	0.00973752	yes	ENSONIP00000043253.1	0.848429	no	down	0.363991	no	GO:0004359;GO:0005759;GO:0008652;GO:0006543;GO:0007269;GO:0014047	glutaminase activity;mitochondrial matrix;cellular amino acid biosynthetic process;glutamine catabolic process;neurotransmitter secretion;glutamate secretion	molecular_function;cellular_component;biological_process;biological_process;biological_process;biological_process	ko00250;ko00471;ko00330;ko00910;ko04964	Alanine, aspartate and glutamate metabolism;D-Glutamine and D-glutamate metabolism;Arginine and proline metabolism;Nitrogen metabolism;Proximal tubule bicarbonate reclamation	Metabolism;Metabolism;Metabolism;Metabolism;Organismal Systems
ENSONIG00000003336 : ENSONIG00000003336 : ENSONIP00000073232.1	ENSONIG00000003336	5.72506	yes	up	3.84454e-14	yes	ENSONIP00000073232.1	1.20633	yes	up	0.00417897	yes	GO:0007044;GO:0008201;GO:0005578;GO:0042060;GO:0008360;GO:0016324;GO:0001525;GO:0006953;GO:0007160;GO:0016504	cell-substrate junction assembly;heparin binding;proteinaceous extracellular matrix;wound healing;regulation of cell shape;apical plasma membrane;angiogenesis;acute-phase response;cell-matrix adhesion;peptidase activator activity	biological_process;molecular_function;cellular_component;biological_process;biological_process;cellular_component;biological_process;biological_process;biological_process;molecular_function	ko05100;ko05200;ko05222;ko04810;ko04512;ko04510	Bacterial invasion of epithelial cells;Pathways in cancer;Small cell lung cancer;Regulation of actin cytoskeleton;ECM-receptor interaction;Focal adhesion	Human Diseases;Human Diseases;Human Diseases;Cellular Processes;Environmental Information Processing;Cellular Processes
ENSONIG00000013093 : ENSONIG00000013093 : ENSONIP00000076082.1	ENSONIG00000013093	0.703906	no	down	0.184216	no	ENSONIP00000076082.1	1.07326	no	up	0.212951	no	GO:0035091;GO:0005515;GO:0007154;GO:0005737	phosphatidylinositol binding;protein binding;cell communication;cytoplasm	molecular_function;molecular_function;biological_process;cellular_component	ko05140;ko04145;ko04670	Leishmaniasis;Phagosome;Leukocyte transendothelial migration	Human Diseases;Cellular Processes;Organismal Systems
ENSONIG00000010201 : ENSONIG00000010201 : ENSONIP00000048863.1	ENSONIG00000010201	1.43598	no	up	4.86551e-14	yes	ENSONIP00000048863.1	0.914167	no	down	0.0805375	no	GO:0004674;GO:0005524;GO:0004713	protein serine/threonine kinase activity;ATP binding;protein tyrosine kinase activity	molecular_function;molecular_function;molecular_function	ko04010;ko04722;ko05214;ko05221;ko05215;ko04810;ko05219;ko04370;ko05220;ko04912;ko05211;ko04012;ko04720;ko05223;ko05020;ko04540;ko05200;ko04916;ko05216;ko04910;ko04660;ko05213;ko04662;ko04664;ko04270;ko04650;ko05218;ko04730;ko04620	MAPK signaling pathway;Neurotrophin signaling pathway;Glioma;Acute myeloid leukemia;Prostate cancer;Regulation of actin cytoskeleton;Bladder cancer;VEGF signaling pathway;Chronic myeloid leukemia;GnRH signaling pathway;Renal cell carcinoma;ErbB signaling pathway;Long-term potentiation;Non-small cell lung cancer;Prion diseases;Gap junction;Pathways in cancer;Melanogenesis;Thyroid cancer;Insulin si…	Environmental Information Processing;Organismal Systems;Human Diseases;Human Diseases;Human Diseases;Cellular Processes;Human Diseases;Environmental Information Processing;Human Diseases;Organismal Systems;Human Diseases;Environmental Information Processing;Organismal Systems;Human Diseases;Human Diseases;Cellular Processes;Human Diseases;Organismal Systems;Human Diseases;Organismal Systems;Organ…
ENSONIG00000010337 : ENSONIG00000010337 : ENSONIP00000012996.2	ENSONIG00000010337	0.973249	no	down	0.741213	no	ENSONIP00000012996.2	0.873556	no	down	0.183437	no	GO:0005739;GO:0051790;GO:0006637;GO:0051792;GO:0004315	mitochondrion;short-chain fatty acid biosynthetic process;acyl-CoA metabolic process;medium-chain fatty acid biosynthetic process;3-oxoacyl-[acyl-carrier-protein] synthase activity	cellular_component;biological_process;biological_process;biological_process;molecular_function	ko00061	Fatty acid biosynthesis	Metabolism
ENSONIG00000010816 : ENSONIG00000010816 : ENSONIP00000036094.1	ENSONIG00000010816	2.63311	yes	up	6.41513e-09	yes	ENSONIP00000036094.1	0.960458	no	down	0.173603	no	GO:0005886;GO:0055085;GO:0016021	plasma membrane;transmembrane transport;integral to membrane	cellular_component;biological_process;cellular_component	ko05110	Vibrio cholerae infection	Human Diseases
ENSONIG00000019030 : ENSONIG00000019030 : ENSONIP00000023960.2	ENSONIG00000019030	0.857606	no	down	0.272462	no	ENSONIP00000023960.2	0.951545	no	down	0.128382	no	GO:0015031;GO:0061008;GO:0006351;GO:0006355;GO:0005770;GO:0055037;GO:0005769	protein transport;hepaticobiliary system development;transcription, DNA-dependent;regulation of transcription, DNA-dependent;late endosome;recycling endosome;early endosome	biological_process;biological_process;biological_process;biological_process;cellular_component;cellular_component;cellular_component	.	.	.
ENSONIG00000008501 : ENSONIG00000008501 : ENSONIP00000032546.1	ENSONIG00000008501	0.726018	no	down	0.0153246	yes	ENSONIP00000032546.1	0.840233	no	down	0.0706152	no	GO:0005515;GO:0005545	protein binding;1-phosphatidylinositol binding	molecular_function;molecular_function	ko05014	Amyotrophic lateral sclerosis (ALS	Human Diseases
ENSONIG00000003697 : ENSONIG00000003697 : ENSONIP00000004649.2	ENSONIG00000003697	1.05867	no	up	0.212398	no	ENSONIP00000004649.2	0.85216	no	down	0.222676	no	GO:0005524;GO:0051082;GO:0031072;GO:0046872;GO:0009408;GO:0006260;GO:0006457;GO:0005737	ATP binding;unfolded protein binding;heat shock protein binding;metal ion binding;response to heat;DNA replication;protein folding;cytoplasm	molecular_function;molecular_function;molecular_function;molecular_function;biological_process;biological_process;biological_process;cellular_component	.	.	.
ENSONIG00000003286 : ENSONIG00000003286 : ENSONIP00000004122.2	ENSONIG00000003286	0.852675	no	down	0.136703	no	ENSONIP00000004122.2	0.980522	no	down	0.183338	no	GO:0005737	cytoplasm	cellular_component	ko04810;ko04270;ko04720;ko04510	Regulation of actin cytoskeleton;Vascular smooth muscle contraction;Long-term potentiation;Focal adhesion	Cellular Processes;Organismal Systems;Organismal Systems;Cellular Processes
ENSONIG00000012562 : ENSONIG00000012562 : ENSONIP00000015815.1	ENSONIG00000012562	0.483116	yes	down	0.00202192	yes	ENSONIP00000015815.1	1.07935	no	up	0.0370115	yes	.	.	.	.	.	.
ENSONIG00000012940 : ENSONIG00000012940 : ENSONIP00000038833.1	ENSONIG00000012940	0.699393	no	down	0.0122435	yes	ENSONIP00000038833.1	0.806685	yes	down	0.00965105	yes	GO:0008324;GO:0055072;GO:0016021	cation transmembrane transporter activity;iron ion homeostasis;integral to membrane	molecular_function;biological_process;cellular_component	.	.	.
ENSONIG00000019692 : ENSONIG00000019692 : ENSONIP00000056061.1	ENSONIG00000019692	0.979677	no	down	0.712974	no	ENSONIP00000056061.1	1.06398	no	up	0.272454	no	GO:0005515;GO:0005737;GO:0005654;GO:0030530;GO:0003723;GO:0071013;GO:0000166;GO:0000398	protein binding;cytoplasm;nucleoplasm;heterogeneous nuclear ribonucleoprotein complex;RNA binding;catalytic step 2 spliceosome;nucleotide binding;nuclear mRNA splicing, via spliceosome	molecular_function;cellular_component;cellular_component;cellular_component;molecular_function;cellular_component;molecular_function;biological_process	.	.	.
ENSONIG00000008112 : ENSONIG00000008112 : ENSONIP00000010217.2	ENSONIG00000008112	1.06466	no	up	0.134502	no	ENSONIP00000010217.2	0.991371	no	down	0.833621	no	GO:0005737;GO:0006378;GO:0008143;GO:0000166;GO:0005634	cytoplasm;mRNA polyadenylation;poly(A) RNA binding;nucleotide binding;nucleus	cellular_component;biological_process;molecular_function;molecular_function;cellular_component	.	.	.
ENSONIG00000013341 : ENSONIG00000013341 : ENSONIP00000016775.2	ENSONIG00000013341	1.00209	no	up	0.399638	no	ENSONIP00000016775.2	0.887701	no	down	0.0468866	yes	GO:0005737;GO:0006366;GO:0004871;GO:0008180;GO:0005515;GO:0010388	cytoplasm;transcription from RNA polymerase II promoter;signal transducer activity;signalosome;protein binding;cullin deneddylation	cellular_component;biological_process;molecular_function;cellular_component;molecular_function;biological_process	.	.	.
ENSONIG00000011877 : ENSONIG00000011877 : ENSONIP00000014952.1	ENSONIG00000011877	0.92416	no	down	0.609465	no	ENSONIP00000014952.1	0.810803	yes	down	0.00393071	yes	GO:0006096;GO:0005524;GO:0003872;GO:0046872	glycolysis;ATP binding;6-phosphofructokinase activity;metal ion binding	biological_process;molecular_function;molecular_function;molecular_function	ko00010;ko00051;ko00030;ko00052	Glycolysis / Gluconeogenesis;Fructose and mannose metabolism;Pentose phosphate pathway;Galactose metabolism	Metabolism;Metabolism;Metabolism;Metabolism
ENSONIG00000002239 : ENSONIG00000002239 : ENSONIP00000036473.1	ENSONIG00000002239	1.03391	no	up	0.119233	no	ENSONIP00000036473.1	0.966241	no	down	0.0785127	no	GO:0031080;GO:0055085;GO:0031965;GO:0015031;GO:0051028	Nup107-160 complex;transmembrane transport;nuclear membrane;protein transport;mRNA transport	cellular_component;biological_process;cellular_component;biological_process;biological_process	.	.	.
ENSONIG00000003851 : ENSONIG00000003851 : ENSONIP00000004851.2	ENSONIG00000003851	0.791813	no	down	0.000813702	yes	ENSONIP00000004851.2	0.971738	no	down	0.437349	no	GO:0016070;GO:0016281;GO:0006446;GO:0003743	RNA metabolic process;eukaryotic translation initiation factor 4F complex;regulation of translational initiation;translation initiation factor activity	biological_process;cellular_component;biological_process;molecular_function	ko05416	Viral myocarditis	Human Diseases
ENSONIG00000017964 : ENSONIG00000017964 : ENSONIP00000022637.2	ENSONIG00000017964	0.979211	no	down	0.596869	no	ENSONIP00000022637.2	1.02634	no	up	0.686687	no	GO:0005737;GO:0004867	cytoplasm;serine-type endopeptidase inhibitor activity	cellular_component;molecular_function	ko04115	p53 signaling pathway	Cellular Processes
ENSONIG00000017315 : ENSONIG00000017315 : ENSONIP00000021837.2	ENSONIG00000017315	1.01562	no	up	1	no	ENSONIP00000021837.2	0.766264	yes	down	0.00484412	yes	GO:0007567;GO:0070403;GO:0005737;GO:0007565;GO:0016404;GO:0006693;GO:0007179;GO:0070493;GO:0004957;GO:0045786	parturition;NAD+ binding;cytoplasm;female pregnancy;15-hydroxyprostaglandin dehydrogenase (NAD+) activity;prostaglandin metabolic process;transforming growth factor beta receptor signaling pathway;thrombin receptor signaling pathway;prostaglandin E receptor activity;negative regulation of cell cycle	biological_process;molecular_function;cellular_component;biological_process;molecular_function;biological_process;biological_process;biological_process;molecular_function;biological_process	.	.	.
ENSONIG00000003166 : ENSONIG00000003166 : ENSONIP00000003968.2	ENSONIG00000003166	0.774609	no	down	0.0142963	yes	ENSONIP00000003968.2	0.841621	no	down	0.0170914	yes	.	.	.	.	.	.
ENSONIG00000013594 : ENSONIG00000013594 : ENSONIP00000017097.2	ENSONIG00000013594	1.04907	no	up	0.0687198	no	ENSONIP00000017097.2	0.861042	no	down	0.006575	yes	GO:0008470;GO:0043565;GO:0033554;GO:0005737	isovaleryl-CoA dehydrogenase activity;sequence-specific DNA binding;cellular response to stress;cytoplasm	molecular_function;molecular_function;biological_process;cellular_component	.	.	.
ENSONIG00000003054 : ENSONIG00000003054 : ENSONIP00000003825.2	ENSONIG00000003054	0.939674	no	down	0.839203	no	ENSONIP00000003825.2	1.01443	no	up	0.819303	no	.	.	.	ko00970;ko00860	Aminoacyl-tRNA biosynthesis;Porphyrin and chlorophyll metabolism	Genetic Information Processing;Metabolism
ENSONIG00000012847 : ENSONIG00000012847 : ENSONIP00000063104.1	ENSONIG00000012847	0.927547	no	down	0.736161	no	ENSONIP00000063104.1	1.12841	no	up	0.0326294	yes	GO:0017124;GO:0030054;GO:0007399;GO:0046847;GO:0008093;GO:0007165;GO:0043197	SH3 domain binding;cell junction;nervous system development;filopodium assembly;cytoskeletal adaptor activity;signal transduction;dendritic spine	molecular_function;cellular_component;biological_process;biological_process;molecular_function;biological_process;cellular_component	.	.	.
ENSONIG00000014126 : ENSONIG00000014126 : ENSONIP00000039580.1	ENSONIG00000014126	1.60592	no	up	1	no	ENSONIP00000039580.1	1.21076	yes	up	0.153196	no	GO:0045087;GO:0005576	innate immune response;extracellular region	biological_process;cellular_component	ko00400;ko00950;ko00250;ko00280;ko00360;ko00350;ko00270;ko00380	Phenylalanine, tyrosine and tryptophan biosynthesis;Isoquinoline alkaloid biosynthesis;Alanine, aspartate and glutamate metabolism;Valine, leucine and isoleucine degradation;Phenylalanine metabolism;Tyrosine metabolism;Cysteine and methionine metabolism;Tryptophan metabolism	Metabolism;Metabolism;Metabolism;Metabolism;Metabolism;Metabolism;Metabolism;Metabolism
ENSONIG00000012549 : ENSONIG00000012549 : ENSONIP00000015799.2	ENSONIG00000012549	0.98049	no	down	0.673558	no	ENSONIP00000015799.2	0.974654	no	down	0.0665183	no	GO:0016021;GO:0004559;GO:0006013;GO:0043687;GO:0008270;GO:0030246;GO:0018279;GO:0004572;GO:0000139	integral to membrane;alpha-mannosidase activity;mannose metabolic process;post-translational protein modification;zinc ion binding;carbohydrate binding;protein N-linked glycosylation via asparagine;mannosyl-oligosaccharide 1,3-1,6-alpha-mannosidase activity;Golgi membrane	cellular_component;molecular_function;biological_process;biological_process;molecular_function;molecular_function;biological_process;molecular_function;cellular_component	ko00510	N-Glycan biosynthesis	Metabolism
ENSONIG00000008325 : ENSONIG00000008325 : ENSONIP00000046948.1	ENSONIG00000008325	1.07536	no	up	0.0525154	no	ENSONIP00000046948.1	0.897533	no	down	0.0155323	yes	GO:0003723;GO:0008026;GO:0005524;GO:0005730	RNA binding;ATP-dependent helicase activity;ATP binding;nucleolus	molecular_function;molecular_function;molecular_function;cellular_component	.	.	.
ENSONIG00000011020 : ENSONIG00000011020 : ENSONIP00000013866.1	ENSONIG00000011020	1.69724	no	up	0.00959709	yes	ENSONIP00000013866.1	0.996008	no	down	0.980123	no	GO:0005576;GO:0007275	extracellular region;multicellular organismal development	cellular_component;biological_process	.	.	.
ENSONIG00000010436 : ENSONIG00000010436 : ENSONIP00000013118.1	ENSONIG00000010436	0.728355	no	down	0.000290826	yes	ENSONIP00000013118.1	0.90779	no	down	0.664049	no	.	.	.	.	.	.
ENSONIG00000017846 : ENSONIG00000017846 : ENSONIP00000047879.1	ENSONIG00000017846	1.14383	no	up	0.00447846	yes	ENSONIP00000047879.1	0.903267	no	down	0.113119	no	GO:0007165;GO:0045862;GO:0071300;GO:0051571;GO:0030854;GO:0005829;GO:0008047;GO:0016262;GO:0005515;GO:0006493;GO:0070688	signal transduction;positive regulation of proteolysis;cellular response to retinoic acid;positive regulation of histone H3-K4 methylation;positive regulation of granulocyte differentiation;cytosol;enzyme activator activity;protein N-acetylglucosaminyltransferase activity;protein binding;protein O-linked glycosylation;MLL5-L complex	biological_process;biological_process;biological_process;biological_process;biological_process;cellular_component;molecular_function;molecular_function;molecular_function;biological_process;cellular_component	.	.	.
ENSONIG00000002746 : ENSONIG00000002746 : ENSONIP00000065041.1	ENSONIG00000002746	1.2155	no	up	0.00489918	yes	ENSONIP00000065041.1	1.06222	no	up	0.282548	no	.	.	.	.	.	.
ENSONIG00000009767 : ENSONIG00000009767 : ENSONIP00000027328.1	ENSONIG00000009767	1.13301	no	up	0.0757049	no	ENSONIP00000027328.1	0.964637	no	down	0.418784	no	GO:0031588;GO:0005654;GO:0004862;GO:0043531;GO:0007050;GO:0005829;GO:0008603;GO:0006754;GO:0010800;GO:0005977;GO:0006853;GO:0046320;GO:0008286;GO:0006110;GO:0046324;GO:0019901;GO:0005524;GO:0008607;GO:0045860;GO:0004691;GO:0042304;GO:0016126;GO:0006633;GO:0030295	AMP-activated protein kinase complex;nucleoplasm;cAMP-dependent protein kinase inhibitor activity;ADP binding;cell cycle arrest;cytosol;cAMP-dependent protein kinase regulator activity;ATP biosynthetic process;positive regulation of peptidyl-threonine phosphorylation;glycogen metabolic process;carnitine shuttle;regulation of fatty acid oxidation;insulin receptor signaling pathway;regulation of gl…	cellular_component;cellular_component;molecular_function;molecular_function;biological_process;cellular_component;molecular_function;biological_process;biological_process;biological_process;biological_process;biological_process;biological_process;biological_process;biological_process;molecular_function;molecular_function;molecular_function;biological_process;molecular_function;biological_process;…	ko05410;ko04920;ko04910	Hypertrophic cardiomyopathy (HCM;Adipocytokine signaling pathway;Insulin signaling pathway	Human Diseases;Organismal Systems;Organismal Systems
ENSONIG00000019847 : ENSONIG00000019847 : ENSONIP00000024982.2	ENSONIG00000019847	0.85324	no	down	0.0818841	no	ENSONIP00000024982.2	0.821743	yes	down	0.0100769	yes	GO:0042470;GO:0005525	melanosome;GTP binding	cellular_component;molecular_function	ko04145;ko04360;ko04062;ko04662;ko04664;ko04650;ko05212;ko05131;ko05014;ko04520;ko04620;ko05200;ko04310;ko04370;ko05211;ko04510;ko04670;ko04010;ko05100;ko05416;ko04722;ko05120;ko05210;ko04810;ko04666	Phagosome;Axon guidance;Chemokine signaling pathway;B cell receptor signaling pathway;Fc epsilon RI signaling pathway;Natural killer cell mediated cytotoxicity;Pancreatic cancer;Shigellosis;Amyotrophic lateral sclerosis (ALS;Adherens junction;Toll-like receptor signaling pathway;Pathways in cancer;Wnt signaling pathway;VEGF signaling pathway;Renal cell carcinoma;Focal adhesion;Leukocyte transendo…	Cellular Processes;Organismal Systems;Organismal Systems;Organismal Systems;Organismal Systems;Organismal Systems;Human Diseases;Human Diseases;Human Diseases;Cellular Processes;Organismal Systems;Human Diseases;Environmental Information Processing;Environmental Information Processing;Human Diseases;Cellular Processes;Organismal Systems;Environmental Information Processing;Human Diseases;Human Di…
ENSONIG00000001502 : ENSONIG00000001502 : ENSONIP00000058989.1	ENSONIG00000001502	0.894049	no	down	0.273811	no	ENSONIP00000058989.1	0.92926	no	down	0.166641	no	GO:0006370;GO:0005634;GO:0005488;GO:0051028;GO:0005737;GO:0031047;GO:0008380;GO:0006417;GO:0000184	mRNA capping;nucleus;binding;mRNA transport;cytoplasm;gene silencing by RNA;RNA splicing;regulation of translation;nuclear-transcribed mRNA catabolic process, nonsense-mediated decay	biological_process;cellular_component;molecular_function;biological_process;cellular_component;biological_process;biological_process;biological_process;biological_process	ko03440	Homologous recombination	Genetic Information Processing
ENSONIG00000019252 : ENSONIG00000019252 : ENSONIP00000024229.2	ENSONIG00000019252	0.91973	no	down	0.683175	no	ENSONIP00000024229.2	0.908397	no	down	0.00464214	yes	.	.	.	ko04130	SNARE interactions in vesicular transport	Genetic Information Processing
ENSONIG00000001581 : ENSONIG00000001581 : ENSONIP00000001979.2	ENSONIG00000001581	0.937541	no	down	0.824128	no	ENSONIP00000001979.2	0.980198	no	down	0.658841	no	GO:0008270;GO:0016491	zinc ion binding;oxidoreductase activity	molecular_function;molecular_function	.	.	.
ENSONIG00000016509 : ENSONIG00000016509 : ENSONIP00000070251.1	ENSONIG00000016509	1.04928	no	up	0.313317	no	ENSONIP00000070251.1	0.79265	yes	down	0.0138804	yes	GO:0016021;GO:0032314;GO:0007275;GO:0043088;GO:0005198;GO:0005923;GO:0016328;GO:0008360;GO:0016192;GO:0040017;GO:0090136;GO:0001921;GO:0034446	integral to membrane;regulation of Rac GTPase activity;multicellular organismal development;regulation of Cdc42 GTPase activity;structural molecule activity;tight junction;lateral plasma membrane;regulation of cell shape;vesicle-mediated transport;positive regulation of locomotion;epithelial cell-cell adhesion;positive regulation of receptor recycling;substrate adhesion-dependent cell spreading	cellular_component;biological_process;biological_process;biological_process;molecular_function;cellular_component;cellular_component;biological_process;biological_process;biological_process;biological_process;biological_process;biological_process	.	.	.
ENSONIG00000007226 : ENSONIG00000007226 : ENSONIP00000038993.1	ENSONIG00000007226	0.951126	no	down	0.982892	no	ENSONIP00000038993.1	1.08371	no	up	0.251362	no	GO:0045743;GO:0005916;GO:0044325;GO:0048660;GO:0019901;GO:0060789;GO:0030057;GO:0045202;GO:0004871;GO:0009898;GO:0030997;GO:0060484;GO:0072079;GO:0007016;GO:0048538;GO:0001569;GO:0031528;GO:0005515;GO:0045669;GO:0043123;GO:0001658;GO:0005667;GO:0001711;GO:0042129;GO:0071681;GO:0048489;GO:0045768;GO:0006921;GO:0042153;GO:0042493;GO:0061154;GO:0043410;GO:0008134;GO:0070602;GO:0000578;GO:0070369;GO:…	positive regulation of fibroblast growth factor receptor signaling pathway;fascia adherens;ion channel binding;regulation of smooth muscle cell proliferation;protein kinase binding;hair follicle placode formation;desmosome;synapse;signal transducer activity;internal side of plasma membrane;regulation of centriole-centriole cohesion;lung-associated mesenchyme development;nephron tubule formation;c…	biological_process;cellular_component;molecular_function;biological_process;molecular_function;biological_process;cellular_component;cellular_component;molecular_function;cellular_component;biological_process;biological_process;biological_process;biological_process;biological_process;biological_process;cellular_component;molecular_function;biological_process;biological_process;biological_process;…	ko04510;ko05412;ko04670;ko04520;ko05130;ko04916;ko05216;ko04310;ko05213;ko05217;ko05200;ko04530;ko05100;ko05215;ko05210	Focal adhesion;Arrhythmogenic right ventricular cardiomyopathy (ARVC;Leukocyte transendothelial migration;Adherens junction;Pathogenic Escherichia coli infection;Melanogenesis;Thyroid cancer;Wnt signaling pathway;Endometrial cancer;Basal cell carcinoma;Pathways in cancer;Tight junction;Bacterial invasion of epithelial cells;Prostate cancer;Colorectal cancer	Cellular Processes;Human Diseases;Organismal Systems;Cellular Processes;Human Diseases;Organismal Systems;Human Diseases;Environmental Information Processing;Human Diseases;Human Diseases;Human Diseases;Cellular Processes;Human Diseases;Human Diseases;Human Diseases
ENSONIG00000012302 : ENSONIG00000012302 : ENSONIP00000015493.2	ENSONIG00000012302	0.81207	no	down	0.0950343	no	ENSONIP00000015493.2	0.938611	no	down	0.371214	no	.	.	.	ko04510;ko04512;ko05222;ko05200	Focal adhesion;ECM-receptor interaction;Small cell lung cancer;Pathways in cancer	Cellular Processes;Environmental Information Processing;Human Diseases;Human Diseases
ENSONIG00000012436 : ENSONIG00000012436 : ENSONIP00000073632.1	ENSONIG00000012436	1.1515	no	up	0.0119882	yes	ENSONIP00000073632.1	0.901141	no	down	0.147386	no	GO:0005737;GO:0005681;GO:0008026;GO:0006397;GO:0005524;GO:0003677;GO:0008380	cytoplasm;spliceosomal complex;ATP-dependent helicase activity;mRNA processing;ATP binding;DNA binding;RNA splicing	cellular_component;cellular_component;molecular_function;biological_process;molecular_function;molecular_function;biological_process	ko00230	Purine metabolism	Metabolism
ENSONIG00000017912 : ENSONIG00000017912 : ENSONIP00000022577.1	ENSONIG00000017912	1.41813	no	up	7.42178e-06	yes	ENSONIP00000022577.1	0.779887	yes	down	0.0302094	yes	GO:0008083;GO:0045766;GO:0030154;GO:0008201;GO:0051781;GO:0008543;GO:0030097;GO:0005938;GO:0005615;GO:0001525;GO:0030335	growth factor activity;positive regulation of angiogenesis;cell differentiation;heparin binding;positive regulation of cell division;fibroblast growth factor receptor signaling pathway;hemopoiesis;cell cortex;extracellular space;angiogenesis;positive regulation of cell migration	molecular_function;biological_process;biological_process;molecular_function;biological_process;biological_process;biological_process;cellular_component;cellular_component;biological_process;biological_process	ko05200;ko04010;ko04810;ko05218	Pathways in cancer;MAPK signaling pathway;Regulation of actin cytoskeleton;Melanoma	Human Diseases;Environmental Information Processing;Cellular Processes;Human Diseases
ENSONIG00000001098 : ENSONIG00000001098 : ENSONIP00000001390.1	ENSONIG00000001098	0.883005	no	down	0.147121	no	ENSONIP00000001390.1	0.965608	no	down	0.0994135	no	GO:0000398	nuclear mRNA splicing, via spliceosome	biological_process	ko03040;ko04330	Spliceosome;Notch signaling pathway	Genetic Information Processing;Environmental Information Processing
ENSONIG00000018733 : ENSONIG00000018733 : ENSONIP00000032638.1	ENSONIG00000018733	2.64662	yes	up	8.45429e-18	yes	ENSONIP00000032638.1	0.923693	no	down	0.305329	no	GO:0007155;GO:0005581;GO:0005198	cell adhesion;collagen;structural molecule activity	biological_process;cellular_component;molecular_function	.	.	.
ENSONIG00000016446 : ENSONIG00000016446 : ENSONIP00000063100.1	ENSONIG00000016446	1.04729	no	up	0.110935	no	ENSONIP00000063100.1	0.778074	yes	down	0.0294211	yes	GO:0017076	purine nucleotide binding	molecular_function	.	.	.
ENSONIG00000003060 : ENSONIG00000003060 : ENSONIP00000044012.1	ENSONIG00000003060	0.730715	no	down	0.0693942	no	ENSONIP00000044012.1	0.91051	no	down	0.0736326	no	GO:0005524;GO:0003774;GO:0005874;GO:0005813;GO:0005868;GO:0006810	ATP binding;motor activity;microtubule;centrosome;cytoplasmic dynein complex;transport	molecular_function;molecular_function;cellular_component;cellular_component;cellular_component;biological_process	ko04962;ko04145	Vasopressin-regulated water reabsorption;Phagosome	Organismal Systems;Cellular Processes
ENSONIG00000017695 : ENSONIG00000017695 : ENSONIP00000056768.1	ENSONIG00000017695	1.03015	no	up	0.135233	no	ENSONIP00000056768.1	0.836547	no	down	0.122378	no	GO:0006986;GO:0031625;GO:0005811;GO:0034098;GO:0043130	response to unfolded protein;ubiquitin protein ligase binding;lipid particle;Cdc48p-Npl4p-Ufd1p AAA ATPase complex;ubiquitin binding	biological_process;molecular_function;cellular_component;cellular_component;molecular_function	.	.	.
ENSONIG00000011285 : ENSONIG00000011285 : ENSONIP00000061462.1	ENSONIG00000011285	0.909723	no	down	0.670014	no	ENSONIP00000061462.1	0.930502	no	down	0.115673	no	GO:0005488;GO:0015137;GO:0005743;GO:0006843;GO:0016021	binding;citrate transmembrane transporter activity;mitochondrial inner membrane;mitochondrial citrate transport;integral to membrane	molecular_function;molecular_function;cellular_component;biological_process;cellular_component	.	.	.
ENSONIG00000002289 : ENSONIG00000002289 : ENSONIP00000002859.2	ENSONIG00000002289	0.322801	yes	down	6.96073e-11	yes	ENSONIP00000002859.2	0.743463	yes	down	0.0015068	yes	.	.	.	.	.	.
ENSONIG00000020045 : ENSONIG00000020045 : ENSONIP00000025248.1	ENSONIG00000020045	0.31658	yes	down	4.60301e-12	yes	ENSONIP00000025248.1	1.0384	no	up	0.597013	no	GO:0005737;GO:0005839;GO:0051603;GO:0005634;GO:0004298	cytoplasm;proteasome core complex;proteolysis involved in cellular protein catabolic process;nucleus;threonine-type endopeptidase activity	cellular_component;cellular_component;biological_process;cellular_component;molecular_function	ko03050	Proteasome	Genetic Information Processing
ENSONIG00000018819 : ENSONIG00000018819 : ENSONIP00000023694.1	ENSONIG00000018819	1.30856	no	up	1.26041e-07	yes	ENSONIP00000023694.1	0.921845	no	down	0.339104	no	.	.	.	.	.	.
ENSONIG00000012103 : ENSONIG00000012103 : ENSONIP00000015235.2	ENSONIG00000012103	0.925827	no	down	0.619791	no	ENSONIP00000015235.2	0.962067	no	down	0.590763	no	GO:0003774;GO:0030049;GO:0016461;GO:0030898;GO:0008307;GO:0005509;GO:0007519	motor activity;muscle filament sliding;unconventional myosin complex;actin-dependent ATPase activity;structural constituent of muscle;calcium ion binding;skeletal muscle tissue development	molecular_function;biological_process;cellular_component;molecular_function;molecular_function;molecular_function;biological_process	.	.	.
ENSONIG00000012889 : ENSONIG00000012889 : ENSONIP00000016220.2	ENSONIG00000012889	0.901051	no	down	0.432585	no	ENSONIP00000016220.2	1.02361	no	up	0.709322	no	GO:0005737;GO:0008134;GO:0005925;GO:0006357;GO:0006351;GO:0008270;GO:0007155;GO:0001725	cytoplasm;transcription factor binding;focal adhesion;regulation of transcription from RNA polymerase II promoter;transcription, DNA-dependent;zinc ion binding;cell adhesion;stress fiber	cellular_component;molecular_function;cellular_component;biological_process;biological_process;molecular_function;biological_process;cellular_component	ko04510	Focal adhesion	Cellular Processes
ENSONIG00000002683 : ENSONIG00000002683 : ENSONIP00000060957.1	ENSONIG00000002683	0.612466	no	down	9.02713e-06	yes	ENSONIP00000060957.1	1.00167	no	up	0.981924	no	GO:0048471;GO:0005874	perinuclear region of cytoplasm;microtubule	cellular_component;cellular_component	.	.	.
ENSONIG00000010566 : ENSONIG00000010566 : ENSONIP00000030470.1	ENSONIG00000010566	1.06218	no	up	0.0282951	yes	ENSONIP00000030470.1	0.999001	no	down	0.980919	no	GO:0006414;GO:0003735;GO:0005515;GO:0042273;GO:0008097;GO:0031018;GO:0006364;GO:0006415;GO:0016071;GO:0019083;GO:0005730;GO:0022625	translational elongation;structural constituent of ribosome;protein binding;ribosomal large subunit biogenesis;5S rRNA binding;endocrine pancreas development;rRNA processing;translational termination;mRNA metabolic process;viral transcription;nucleolus;cytosolic large ribosomal subunit	biological_process;molecular_function;molecular_function;biological_process;molecular_function;biological_process;biological_process;biological_process;biological_process;biological_process;cellular_component;cellular_component	ko03010	Ribosome	Genetic Information Processing
ENSONIG00000009254 : ENSONIG00000009254 : ENSONIP00000035881.1	ENSONIG00000009254	0.988726	no	down	0.458752	no	ENSONIP00000035881.1	0.981182	no	down	0.590862	no	GO:0042176;GO:0005488;GO:0030234;GO:0000502	regulation of protein catabolic process;binding;enzyme regulator activity;proteasome complex	biological_process;molecular_function;molecular_function;cellular_component	ko03050	Proteasome	Genetic Information Processing
ENSONIG00000013982 : ENSONIG00000013982 : ENSONIP00000055815.1	ENSONIG00000013982	0.942727	no	down	0.910406	no	ENSONIP00000055815.1	1.03321	no	up	0.487449	no	GO:0008277;GO:0017089;GO:0008060;GO:0005737;GO:0005515;GO:0051861;GO:0032312;GO:0008270;GO:0005654	regulation of G-protein coupled receptor protein signaling pathway;glycolipid transporter activity;ARF GTPase activator activity;cytoplasm;protein binding;glycolipid binding;regulation of ARF GTPase activity;zinc ion binding;nucleoplasm	biological_process;molecular_function;molecular_function;cellular_component;molecular_function;molecular_function;biological_process;molecular_function;cellular_component	ko04144	Endocytosis	Cellular Processes
ENSONIG00000019413 : ENSONIG00000019413 : ENSONIP00000060674.1	ENSONIG00000019413	0.850118	no	down	0.118287	no	ENSONIP00000060674.1	0.992693	no	down	0.824965	no	GO:0007411;GO:0016021;GO:0005886;GO:0017154;GO:0005622	axon guidance;integral to membrane;plasma membrane;semaphorin receptor activity;intracellular	biological_process;cellular_component;cellular_component;molecular_function;cellular_component	ko04360	Axon guidance	Organismal Systems
ENSONIG00000015793 : ENSONIG00000015793 : ENSONIP00000077660.1	ENSONIG00000015793	1.17834	no	up	3.35682e-05	yes	ENSONIP00000077660.1	0.893939	no	down	0.0410701	yes	GO:0016021;GO:0005789;GO:0016874;GO:0008270	integral to membrane;endoplasmic reticulum membrane;ligase activity;zinc ion binding	cellular_component;cellular_component;molecular_function;molecular_function	ko04120	Ubiquitin mediated proteolysis	Genetic Information Processing
ENSONIG00000013816 : ENSONIG00000013816 : ENSONIP00000034338.1	ENSONIG00000013816	0.15813	yes	down	4.2623e-89	yes	ENSONIP00000034338.1	0.292546	yes	down	6.21646e-05	yes	GO:0007275;GO:0004872;GO:0007160;GO:0007229;GO:0005488;GO:0008305	multicellular organismal development;receptor activity;cell-matrix adhesion;integrin-mediated signaling pathway;binding;integrin complex	biological_process;molecular_function;biological_process;biological_process;molecular_function;cellular_component	ko04650;ko04670;ko05144;ko05140;ko04145;ko04810;ko04514;ko05416	Natural killer cell mediated cytotoxicity;Leukocyte transendothelial migration;Malaria;Leishmaniasis;Phagosome;Regulation of actin cytoskeleton;Cell adhesion molecules (CAMs;Viral myocarditis	Organismal Systems;Organismal Systems;Human Diseases;Human Diseases;Cellular Processes;Cellular Processes;Environmental Information Processing;Human Diseases
ENSONIG00000010863 : ENSONIG00000010863 : ENSONIP00000054427.1	ENSONIG00000010863	0.768192	no	down	0.0162863	yes	ENSONIP00000054427.1	0.955034	no	down	0.122014	no	GO:0042470	melanosome	cellular_component	ko04722;ko04114;ko04110	Neurotrophin signaling pathway;Oocyte meiosis;Cell cycle	Organismal Systems;Cellular Processes;Cellular Processes
ENSONIG00000003463 : ENSONIG00000003463 : ENSONIP00000004358.2	ENSONIG00000003463	1.05992	no	up	0.0588177	no	ENSONIP00000004358.2	1.09424	no	up	0.0371572	yes	GO:0005634;GO:0007155;GO:0005488;GO:0030057	nucleus;cell adhesion;binding;desmosome	cellular_component;biological_process;molecular_function;cellular_component	.	.	.
ENSONIG00000008930 : ENSONIG00000008930 : ENSONIP00000048886.1	ENSONIG00000008930	0.982747	no	down	0.577669	no	ENSONIP00000048886.1	0.985766	no	down	0.716649	no	GO:0006511;GO:0005515;GO:0005524;GO:0016567;GO:0016874;GO:0019780	ubiquitin-dependent protein catabolic process;protein binding;ATP binding;protein ubiquitination;ligase activity;FAT10 activating enzyme activity	biological_process;molecular_function;molecular_function;biological_process;molecular_function;molecular_function	ko04120	Ubiquitin mediated proteolysis	Genetic Information Processing
ENSONIG00000015726 : ENSONIG00000015726 : ENSONIP00000019791.2	ENSONIG00000015726	1.07898	no	up	0.596615	no	ENSONIP00000019791.2	0.829016	yes	down	0.000206478	yes	GO:0050104;GO:0003857;GO:0005829;GO:0006631;GO:0070403	L-gulonate 3-dehydrogenase activity;3-hydroxyacyl-CoA dehydrogenase activity;cytosol;fatty acid metabolic process;NAD+ binding	molecular_function;molecular_function;cellular_component;biological_process;molecular_function	.	.	.
ENSONIG00000009209 : ENSONIG00000009209 : ENSONIP00000011581.2	ENSONIG00000009209	0.886378	no	down	0.500311	no	ENSONIP00000011581.2	0.76649	yes	down	0.00137669	yes	GO:0008195;GO:0003713;GO:0045944;GO:0005634;GO:0006631;GO:0019432;GO:0005829;GO:0006351;GO:0005789	phosphatidate phosphatase activity;transcription coactivator activity;positive regulation of transcription from RNA polymerase II promoter;nucleus;fatty acid metabolic process;triglyceride biosynthetic process;cytosol;transcription, DNA-dependent;endoplasmic reticulum membrane	molecular_function;molecular_function;biological_process;cellular_component;biological_process;biological_process;cellular_component;biological_process;cellular_component	.	.	.
ENSONIG00000018520 : ENSONIG00000018520 : ENSONIP00000057464.1	ENSONIG00000018520	0.918091	no	down	0.623351	no	ENSONIP00000057464.1	0.957586	no	down	0.0610673	no	GO:0048306;GO:0006909;GO:0005819;GO:0007109;GO:0005544;GO:0005654;GO:0042581;GO:0042470;GO:0007049;GO:0051592;GO:0005635;GO:0045335;GO:0030496;GO:0042582	calcium-dependent protein binding;phagocytosis;spindle;cytokinesis, completion of separation;calcium-dependent phospholipid binding;nucleoplasm;specific granule;melanosome;cell cycle;response to calcium ion;nuclear envelope;phagocytic vesicle;midbody;azurophil granule	molecular_function;biological_process;cellular_component;biological_process;molecular_function;cellular_component;cellular_component;cellular_component;biological_process;biological_process;cellular_component;cellular_component;cellular_component;cellular_component	.	.	.
ENSONIG00000007628 : ENSONIG00000007628 : ENSONIP00000042403.1	ENSONIG00000007628	0.816832	no	down	0.0350523	yes	ENSONIP00000042403.1	0.893657	no	down	0.0375807	yes	.	.	.	.	.	.
ENSONIG00000008398 : ENSONIG00000008398 : ENSONIP00000067615.1	ENSONIG00000008398	0.922389	no	down	0.587611	no	ENSONIP00000067615.1	0.904157	no	down	0.234298	no	GO:0016491	oxidoreductase activity	molecular_function	.	.	.
ENSONIG00000001336 : ENSONIG00000001336 : ENSONIP00000001687.1	ENSONIG00000001336	0.239571	yes	down	9.85711e-26	yes	ENSONIP00000001687.1	0.989718	no	down	0.86264	no	GO:0016020	membrane	cellular_component	.	.	.
ENSONIG00000019029 : ENSONIG00000019029 : ENSONIP00000023959.2	ENSONIG00000019029	1.05835	no	up	0.699676	no	ENSONIP00000023959.2	0.93299	no	down	0.149413	no	GO:0005524;GO:0005634;GO:0004674	ATP binding;nucleus;protein serine/threonine kinase activity	molecular_function;cellular_component;molecular_function	ko04370;ko04010	VEGF signaling pathway;MAPK signaling pathway	Environmental Information Processing;Environmental Information Processing
ENSONIG00000018030 : ENSONIG00000018030 : ENSONIP00000022721.2	ENSONIG00000018030	1.11329	no	up	0.0196498	yes	ENSONIP00000022721.2	0.918772	no	down	0.111543	no	GO:0006351;GO:0005634;GO:0005488;GO:0006355	transcription, DNA-dependent;nucleus;binding;regulation of transcription, DNA-dependent	biological_process;cellular_component;molecular_function;biological_process	.	.	.
ENSONIG00000008491 : ENSONIG00000008491 : ENSONIP00000078267.1	ENSONIG00000008491	0.951191	no	down	0.990334	no	ENSONIP00000078267.1	0.876485	no	down	0.0616059	no	GO:0006544;GO:0006730;GO:0004372	glycine metabolic process;one-carbon metabolic process;glycine hydroxymethyltransferase activity	biological_process;biological_process;molecular_function	ko00680;ko00670;ko00260;ko00460	Methane metabolism;One carbon pool by folate;Glycine, serine and threonine metabolism;Cyanoamino acid metabolism	Metabolism;Metabolism;Metabolism;Metabolism
ENSONIG00000017949 : ENSONIG00000017949 : ENSONIP00000034660.1	ENSONIG00000017949	0.650438	no	down	0.0847381	no	ENSONIP00000034660.1	0.936733	no	down	0.340527	no	GO:0004476;GO:0006013;GO:0050121	mannose-6-phosphate isomerase activity;mannose metabolic process;N-acylglucosamine 2-epimerase activity	molecular_function;biological_process;molecular_function	ko00520	Amino sugar and nucleotide sugar metabolism	Metabolism
ENSONIG00000006410 : ENSONIG00000006410 : ENSONIP00000008082.2	ENSONIG00000006410	0.826489	no	down	0.434277	no	ENSONIP00000008082.2	0.994018	no	down	0.948513	no	GO:0043065;GO:0004222;GO:0002020;GO:0006915	positive regulation of apoptosis;metalloendopeptidase activity;protease binding;apoptosis	biological_process;molecular_function;molecular_function;biological_process	.	.	.
ENSONIG00000008493 : ENSONIG00000008493 : ENSONIP00000057014.1	ENSONIG00000008493	0.957117	no	down	0.907487	no	ENSONIP00000057014.1	0.95919	no	down	0.102956	no	GO:0004823;GO:0005524;GO:0005515;GO:0006429;GO:0005829	leucine-tRNA ligase activity;ATP binding;protein binding;leucyl-tRNA aminoacylation;cytosol	molecular_function;molecular_function;molecular_function;biological_process;cellular_component	ko00290;ko00970	Valine, leucine and isoleucine biosynthesis;Aminoacyl-tRNA biosynthesis	Metabolism;Genetic Information Processing
ENSONIG00000020337 : ENSONIG00000020337 : ENSONIP00000060952.1	ENSONIG00000020337	0.775115	no	down	0.000161699	yes	ENSONIP00000060952.1	1.05022	no	up	0.0810916	no	GO:0004579;GO:0042470;GO:0016021;GO:0006486;GO:0005789	dolichyl-diphosphooligosaccharide-protein glycotransferase activity;melanosome;integral to membrane;protein glycosylation;endoplasmic reticulum membrane	molecular_function;cellular_component;cellular_component;biological_process;cellular_component	ko00510	N-Glycan biosynthesis	Metabolism
ENSONIG00000008128 : ENSONIG00000008128 : ENSONIP00000010236.2	ENSONIG00000008128	0.634004	no	down	2.53961e-06	yes	ENSONIP00000010236.2	1.07863	no	up	0.00469249	yes	GO:0007411;GO:0030224;GO:0031532;GO:0000910;GO:0001725;GO:0008360;GO:0005516;GO:0000146;GO:0005524;GO:0001525;GO:0043495;GO:0051015;GO:0015031;GO:0032154;GO:0050900;GO:0001726;GO:0043534;GO:0030220;GO:0005826;GO:0007229;GO:0005829;GO:0043531;GO:0042803;GO:0001931;GO:0030048;GO:0030898;GO:0005634;GO:0006509	axon guidance;monocyte differentiation;actin cytoskeleton reorganization;cytokinesis;stress fiber;regulation of cell shape;calmodulin binding;microfilament motor activity;ATP binding;angiogenesis;protein anchor;actin filament binding;protein transport;cleavage furrow;leukocyte migration;ruffle;blood vessel endothelial cell migration;platelet formation;actomyosin contractile ring;integrin-mediated…	biological_process;biological_process;biological_process;biological_process;cellular_component;biological_process;molecular_function;molecular_function;molecular_function;biological_process;molecular_function;molecular_function;biological_process;cellular_component;biological_process;cellular_component;biological_process;biological_process;cellular_component;biological_process;cellular_component;…	ko04530;ko05416	Tight junction;Viral myocarditis	Cellular Processes;Human Diseases
ENSONIG00000001656 : ENSONIG00000001656 : ENSONIP00000043951.1	ENSONIG00000001656	1.16625	no	up	0.000236847	yes	ENSONIP00000043951.1	0.919386	no	down	0.0493795	yes	GO:0004135;GO:0005737;GO:0005978;GO:0004134;GO:0043169	amylo-alpha-1,6-glucosidase activity;cytoplasm;glycogen biosynthetic process;4-alpha-glucanotransferase activity;cation binding	molecular_function;cellular_component;biological_process;molecular_function;molecular_function	ko00500	Starch and sucrose metabolism	Metabolism
ENSONIG00000002326 : ENSONIG00000002326 : ENSONIP00000002909.1	ENSONIG00000002326	1.07279	no	up	0.0750047	no	ENSONIP00000002909.1	1.00535	no	up	0.867359	no	GO:0015935;GO:0003723;GO:0006412;GO:0003735	small ribosomal subunit;RNA binding;translation;structural constituent of ribosome	cellular_component;molecular_function;biological_process;molecular_function	ko03010	Ribosome	Genetic Information Processing
ENSONIG00000018968 : ENSONIG00000018968 : ENSONIP00000023881.1	ENSONIG00000018968	0.41771	yes	down	9.2944e-07	yes	ENSONIP00000023881.1	0.91022	no	down	0.0499022	yes	GO:0003779;GO:0051693;GO:0005576;GO:0042470	actin binding;actin filament capping;extracellular region;melanosome	molecular_function;biological_process;cellular_component;cellular_component	.	.	.
ENSONIG00000004347 : ENSONIG00000004347 : ENSONIP00000077891.1	ENSONIG00000004347	1.07724	no	up	0.120838	no	ENSONIP00000077891.1	1.05445	no	up	0.284249	no	.	.	.	ko04530;ko05416	Tight junction;Viral myocarditis	Cellular Processes;Human Diseases
ENSONIG00000008770 : ENSONIG00000008770 : ENSONIP00000011025.2	ENSONIG00000008770	1.31357	no	up	5.57995e-07	yes	ENSONIP00000011025.2	0.654716	yes	down	0.0150312	yes	GO:0005811;GO:0005783;GO:0044255;GO:0005886;GO:0005576	lipid particle;endoplasmic reticulum;cellular lipid metabolic process;plasma membrane;extracellular region	cellular_component;cellular_component;biological_process;cellular_component;cellular_component	.	.	.
ENSONIG00000016870 : ENSONIG00000016870 : ENSONIP00000045839.1	ENSONIG00000016870	0.816854	no	down	0.114889	no	ENSONIP00000045839.1	0.980528	no	down	0.686082	no	GO:0009435;GO:0004514;GO:0005737;GO:0047280;GO:0004516	NAD biosynthetic process;nicotinate-nucleotide diphosphorylase (carboxylating) activity;cytoplasm;nicotinamide phosphoribosyltransferase activity;nicotinate phosphoribosyltransferase activity	biological_process;molecular_function;cellular_component;molecular_function;molecular_function	ko00760	Nicotinate and nicotinamide metabolism	Metabolism
ENSONIG00000010279 : ENSONIG00000010279 : ENSONIP00000012927.2	ENSONIG00000010279	1.63838	no	up	0.000654773	yes	ENSONIP00000012927.2	0.862776	no	down	0.0384682	yes	GO:0001726;GO:0030027;GO:0005884;GO:0030017;GO:0003779;GO:0005634;GO:0005925	ruffle;lamellipodium;actin filament;sarcomere;actin binding;nucleus;focal adhesion	cellular_component;cellular_component;cellular_component;cellular_component;molecular_function;cellular_component;cellular_component	ko00360;ko00680;ko00940	Phenylalanine metabolism;Methane metabolism;Phenylpropanoid biosynthesis	Metabolism;Metabolism;Metabolism
ENSONIG00000017553 : ENSONIG00000017553 : ENSONIP00000022134.1	ENSONIG00000017553	0.91767	no	down	0.53913	no	ENSONIP00000022134.1	1.03355	no	up	0.0474693	yes	GO:0005789;GO:0016021;GO:0009311;GO:0004573	endoplasmic reticulum membrane;integral to membrane;oligosaccharide metabolic process;mannosyl-oligosaccharide glucosidase activity	cellular_component;cellular_component;biological_process;molecular_function	ko00510	N-Glycan biosynthesis	Metabolism
ENSONIG00000000281 : ENSONIG00000000281 : ENSONIP00000000355.2	ENSONIG00000000281	0.993496	no	down	0.548539	no	ENSONIP00000000355.2	0.796945	yes	down	0.100813	no	GO:0030154;GO:0016874;GO:0006355;GO:0007399;GO:0003676;GO:0006351;GO:0008270	cell differentiation;ligase activity;regulation of transcription, DNA-dependent;nervous system development;nucleic acid binding;transcription, DNA-dependent;zinc ion binding	biological_process;molecular_function;biological_process;biological_process;molecular_function;biological_process;molecular_function	.	.	.
ENSONIG00000011477 : ENSONIG00000011477 : ENSONIP00000059716.1	ENSONIG00000011477	0.649255	no	down	6.3877e-07	yes	ENSONIP00000059716.1	0.776725	yes	down	0.0416182	yes	GO:0008449;GO:0046872;GO:0005764;GO:0030203	N-acetylglucosamine-6-sulfatase activity;metal ion binding;lysosome;glycosaminoglycan metabolic process	molecular_function;molecular_function;cellular_component;biological_process	ko04142;ko00531	Lysosome;Glycosaminoglycan degradation	Cellular Processes;Metabolism
ENSONIG00000007254 : ENSONIG00000007254 : ENSONIP00000028648.1	ENSONIG00000007254	10.316	yes	up	1	no	ENSONIP00000028648.1	0.892148	no	down	0.0968543	no	GO:0000103;GO:0004027;GO:0008202	sulfate assimilation;alcohol sulfotransferase activity;steroid metabolic process	biological_process;molecular_function;biological_process	ko00920;ko00140	Sulfur metabolism;Steroid hormone biosynthesis	Metabolism;Metabolism
ENSONIG00000005716 : ENSONIG00000005716 : ENSONIP00000039974.1	ENSONIG00000005716	1.17708	no	up	6.02568e-05	yes	ENSONIP00000039974.1	0.968822	no	down	0.320235	no	GO:0005886;GO:0030170;GO:0005743;GO:0019550;GO:0004069;GO:0005759;GO:0019551;GO:0006532;GO:0006107	plasma membrane;pyridoxal phosphate binding;mitochondrial inner membrane;glutamate catabolic process to aspartate;L-aspartate:2-oxoglutarate aminotransferase activity;mitochondrial matrix;glutamate catabolic process to 2-oxoglutarate;aspartate biosynthetic process;oxaloacetate metabolic process	cellular_component;molecular_function;cellular_component;biological_process;molecular_function;cellular_component;biological_process;biological_process;biological_process	ko00950;ko00960;ko00330;ko00250;ko00360;ko00400;ko00270;ko00350;ko00401;ko00710	Isoquinoline alkaloid biosynthesis;Tropane, piperidine and pyridine alkaloid biosynthesis;Arginine and proline metabolism;Alanine, aspartate and glutamate metabolism;Phenylalanine metabolism;Phenylalanine, tyrosine and tryptophan biosynthesis;Cysteine and methionine metabolism;Tyrosine metabolism;Novobiocin biosynthesis;Carbon fixation in photosynthetic organisms	Metabolism;Metabolism;Metabolism;Metabolism;Metabolism;Metabolism;Metabolism;Metabolism;Metabolism;Metabolism
ENSONIG00000005682 : ENSONIG00000005682 : ENSONIP00000031217.1	ENSONIG00000005682	0.875044	no	down	0.3384	no	ENSONIP00000031217.1	0.949951	no	down	0.463782	no	GO:0070577;GO:0006355;GO:0035173;GO:0003682;GO:0006974;GO:0008270;GO:0006351;GO:0005524;GO:0004715;GO:0016585	histone acetyl-lysine binding;regulation of transcription, DNA-dependent;histone kinase activity;chromatin binding;response to DNA damage stimulus;zinc ion binding;transcription, DNA-dependent;ATP binding;non-membrane spanning protein tyrosine kinase activity;chromatin remodeling complex	molecular_function;biological_process;molecular_function;molecular_function;biological_process;molecular_function;biological_process;molecular_function;molecular_function;cellular_component	.	.	.
ENSONIG00000010169 : ENSONIG00000010169 : ENSONIP00000012789.1	ENSONIG00000010169	1.10018	no	up	0.00548074	yes	ENSONIP00000012789.1	1.05339	no	up	0.370029	no	GO:0070181;GO:0060212;GO:0009409;GO:0016477;GO:0007369;GO:0072004;GO:0048255;GO:0003730;GO:0010494;GO:0030371;GO:0034063;GO:0005654;GO:0009411;GO:0045727;GO:0048793;GO:0019899;GO:0000166;GO:0022008	SSU rRNA binding;negative regulation of nuclear-transcribed mRNA poly(A) tail shortening;response to cold;cell migration;gastrulation;kidney field specification;mRNA stabilization;mRNA 3'-UTR binding;stress granule;translation repressor activity;stress granule assembly;nucleoplasm;response to UV;positive regulation of translation;pronephros development;enzyme binding;nucleotide binding;neurogenes…	molecular_function;biological_process;biological_process;biological_process;biological_process;biological_process;biological_process;molecular_function;cellular_component;molecular_function;biological_process;cellular_component;biological_process;biological_process;biological_process;molecular_function;molecular_function;biological_process	ko05130	Pathogenic Escherichia coli infection	Human Diseases
ENSONIG00000001142 : ENSONIG00000001142 : ENSONIP00000001446.2	ENSONIG00000001142	1.11892	no	up	0.018999	yes	ENSONIP00000001446.2	0.789144	yes	down	0.00652839	yes	GO:0030435;GO:0005576;GO:0005488;GO:0016491	sporulation resulting in formation of a cellular spore;extracellular region;binding;oxidoreductase activity	biological_process;cellular_component;molecular_function;molecular_function	.	.	.
ENSONIG00000015002 : ENSONIG00000015002 : ENSONIP00000018888.1	ENSONIG00000015002	0.939592	no	down	0.856704	no	ENSONIP00000018888.1	0.983471	no	down	0.663169	no	GO:0008380;GO:0006397;GO:0003677;GO:0005654;GO:0003723;GO:0005737;GO:0005681	RNA splicing;mRNA processing;DNA binding;nucleoplasm;RNA binding;cytoplasm;spliceosomal complex	biological_process;biological_process;molecular_function;cellular_component;molecular_function;cellular_component;cellular_component	.	.	.
ENSONIG00000009237 : ENSONIG00000009237 : ENSONIP00000037438.1	ENSONIG00000009237	0.944381	no	down	0.946305	no	ENSONIP00000037438.1	1.01817	no	up	0.827258	no	GO:0006357;GO:0005634;GO:0008270;GO:0003677;GO:0006354;GO:0003746;GO:0032784	regulation of transcription from RNA polymerase II promoter;nucleus;zinc ion binding;DNA binding;transcription elongation, DNA-dependent;translation elongation factor activity;regulation of transcription elongation, DNA-dependent	biological_process;cellular_component;molecular_function;molecular_function;biological_process;molecular_function;biological_process	.	.	.
ENSONIG00000013377 : ENSONIG00000013377 : ENSONIP00000037246.1	ENSONIG00000013377	1.03711	no	up	0.268206	no	ENSONIP00000037246.1	0.920935	no	down	0.372599	no	GO:0005856;GO:0003779;GO:0008270;GO:0042383;GO:0005737	cytoskeleton;actin binding;zinc ion binding;sarcolemma;cytoplasm	cellular_component;molecular_function;molecular_function;cellular_component;cellular_component	ko05416;ko05410;ko05414;ko05412	Viral myocarditis;Hypertrophic cardiomyopathy (HCM;Dilated cardiomyopathy;Arrhythmogenic right ventricular cardiomyopathy (ARVC	Human Diseases;Human Diseases;Human Diseases;Human Diseases
ENSONIG00000014793 : ENSONIG00000014793 : ENSONIP00000018626.2	ENSONIG00000014793	1.92836	no	up	1.24275e-08	yes	ENSONIP00000018626.2	0.657277	yes	down	0.0732641	no	GO:0005777;GO:0008115;GO:0046653;GO:0050031	peroxisome;sarcosine oxidase activity;tetrahydrofolate metabolic process;L-pipecolate oxidase activity	cellular_component;molecular_function;biological_process;molecular_function	ko00310;ko00260;ko04146	Lysine degradation;Glycine, serine and threonine metabolism;Peroxisome	Metabolism;Metabolism;Cellular Processes
ENSONIG00000010340 : ENSONIG00000010340 : ENSONIP00000012999.1	ENSONIG00000010340	0.453553	yes	down	0.00453344	yes	ENSONIP00000012999.1	0.817631	yes	down	0.0704984	no	GO:0005874;GO:0035023;GO:0007264;GO:0048011;GO:0042127;GO:0048365;GO:0005819;GO:0008017;GO:0007067;GO:0006915;GO:0051301;GO:0032587;GO:0046872;GO:0005794;GO:0007026;GO:0005923;GO:0030676;GO:0008270;GO:0005829;GO:0035556;GO:0006886;GO:0051092;GO:0000902;GO:0007015	microtubule;regulation of Rho protein signal transduction;small GTPase mediated signal transduction;nerve growth factor receptor signaling pathway;regulation of cell proliferation;Rac GTPase binding;spindle;microtubule binding;mitosis;apoptosis;cell division;ruffle membrane;metal ion binding;Golgi apparatus;negative regulation of microtubule depolymerization;tight junction;Rac guanyl-nucleotide e…	cellular_component;biological_process;biological_process;biological_process;biological_process;molecular_function;cellular_component;molecular_function;biological_process;biological_process;biological_process;cellular_component;molecular_function;cellular_component;biological_process;cellular_component;molecular_function;molecular_function;cellular_component;biological_process;biological_process;…	.	.	.
ENSONIG00000018466 : ENSONIG00000018466 : ENSONIP00000023247.2	ENSONIG00000018466	3.04478	yes	up	8.5466e-10	yes	ENSONIP00000023247.2	1.25056	yes	up	0.0532613	no	GO:0005509;GO:0007601;GO:0004888;GO:0008083;GO:0018108;GO:0005578;GO:0016020;GO:0005615;GO:0005006;GO:0005154;GO:0006355;GO:0007596;GO:0032331	calcium ion binding;visual perception;transmembrane signaling receptor activity;growth factor activity;peptidyl-tyrosine phosphorylation;proteinaceous extracellular matrix;membrane;extracellular space;epidermal growth factor-activated receptor activity;epidermal growth factor receptor binding;regulation of transcription, DNA-dependent;blood coagulation;negative regulation of chondrocyte different…	molecular_function;biological_process;molecular_function;molecular_function;biological_process;cellular_component;cellular_component;cellular_component;molecular_function;molecular_function;biological_process;biological_process;biological_process	.	.	.
ENSONIG00000017314 : ENSONIG00000017314 : ENSONIP00000039123.1	ENSONIG00000017314	1.1068	no	up	0.00375089	yes	ENSONIP00000039123.1	0.896617	no	down	0.228588	no	GO:0048255;GO:0043621;GO:0008143;GO:0006412;GO:0000166;GO:0006397;GO:0043009;GO:0060212;GO:0005737;GO:0031370	mRNA stabilization;protein self-association;poly(A) RNA binding;translation;nucleotide binding;mRNA processing;chordate embryonic development;negative regulation of nuclear-transcribed mRNA poly(A) tail shortening;cytoplasm;eukaryotic initiation factor 4G binding	biological_process;molecular_function;molecular_function;biological_process;molecular_function;biological_process;biological_process;biological_process;cellular_component;molecular_function	ko05130	Pathogenic Escherichia coli infection	Human Diseases
ENSONIG00000009417 : ENSONIG00000009417 : ENSONIP00000011836.2	ENSONIG00000009417	0.877598	no	down	0.429776	no	ENSONIP00000011836.2	0.938914	no	down	0.171772	no	GO:0000910;GO:0032059;GO:0046872;GO:0007266;GO:0005524;GO:0004674;GO:0017049;GO:0006915;GO:0007010;GO:0000139;GO:0005814	cytokinesis;bleb;metal ion binding;Rho protein signal transduction;ATP binding;protein serine/threonine kinase activity;GTP-Rho binding;apoptosis;cytoskeleton organization;Golgi membrane;centriole	biological_process;cellular_component;molecular_function;biological_process;molecular_function;molecular_function;molecular_function;biological_process;biological_process;cellular_component;cellular_component	ko04062;ko05130;ko04360;ko04350;ko04670;ko04510;ko04270;ko05131;ko04310;ko04810	Chemokine signaling pathway;Pathogenic Escherichia coli infection;Axon guidance;TGF-beta signaling pathway;Leukocyte transendothelial migration;Focal adhesion;Vascular smooth muscle contraction;Shigellosis;Wnt signaling pathway;Regulation of actin cytoskeleton	Organismal Systems;Human Diseases;Organismal Systems;Environmental Information Processing;Organismal Systems;Cellular Processes;Organismal Systems;Human Diseases;Environmental Information Processing;Cellular Processes
ENSONIG00000017282 : ENSONIG00000017282 : ENSONIP00000021797.2	ENSONIG00000017282	1.01899	no	up	0.202708	no	ENSONIP00000021797.2	0.90993	no	down	0.0355239	yes	GO:0016607;GO:0008380;GO:0005524;GO:0006397;GO:0003723;GO:0008026;GO:0015030	nuclear speck;RNA splicing;ATP binding;mRNA processing;RNA binding;ATP-dependent helicase activity;Cajal body	cellular_component;biological_process;molecular_function;biological_process;molecular_function;molecular_function;cellular_component	.	.	.
ENSONIG00000005233 : ENSONIG00000005233 : ENSONIP00000042026.1	ENSONIG00000005233	1.19108	no	up	0.554839	no	ENSONIP00000042026.1	1.44598	yes	up	0.00226219	yes	GO:0009055;GO:0070330;GO:0005792;GO:0005789;GO:0020037	electron carrier activity;aromatase activity;microsome;endoplasmic reticulum membrane;heme binding	molecular_function;molecular_function;cellular_component;cellular_component;molecular_function	.	.	.
ENSONIG00000006825 : ENSONIG00000006825 : ENSONIP00000040877.1	ENSONIG00000006825	1.40266	no	up	0.049611	yes	ENSONIP00000040877.1	0.879386	no	down	0.0444498	yes	GO:0016021;GO:0031072;GO:0005516;GO:0007154;GO:0005432;GO:0005886	integral to membrane;heat shock protein binding;calmodulin binding;cell communication;calcium:sodium antiporter activity;plasma membrane	cellular_component;molecular_function;molecular_function;biological_process;molecular_function;cellular_component	ko04020	Calcium signaling pathway	Environmental Information Processing
ENSONIG00000010185 : ENSONIG00000010185 : ENSONIP00000056373.1	ENSONIG00000010185	1.10189	no	up	0.0261323	yes	ENSONIP00000056373.1	0.859888	no	down	0.0386558	yes	GO:0005634;GO:0004057;GO:0016598;GO:0005737	nucleus;arginyltransferase activity;protein arginylation;cytoplasm	cellular_component;molecular_function;biological_process;cellular_component	.	.	.
ENSONIG00000017736 : ENSONIG00000017736 : ENSONIP00000059315.1	ENSONIG00000017736	0.852255	no	down	0.250069	no	ENSONIP00000059315.1	0.939541	no	down	0.124924	no	GO:0006351;GO:0005730;GO:0004871;GO:0005737;GO:0043123;GO:0006355;GO:0005886;GO:0003677	transcription, DNA-dependent;nucleolus;signal transducer activity;cytoplasm;positive regulation of I-kappaB kinase/NF-kappaB cascade;regulation of transcription, DNA-dependent;plasma membrane;DNA binding	biological_process;cellular_component;molecular_function;cellular_component;biological_process;biological_process;cellular_component;molecular_function	.	.	.
ENSONIG00000006172 : ENSONIG00000006172 : ENSONIP00000060070.1	ENSONIG00000006172	0.987088	no	down	0.440898	no	ENSONIP00000060070.1	1.05375	no	up	0.365401	no	GO:0003723;GO:0017148;GO:0050775;GO:0005829;GO:0030425;GO:0010494;GO:0000932;GO:0061003	RNA binding;negative regulation of translation;positive regulation of dendrite morphogenesis;cytosol;dendrite;stress granule;cytoplasmic mRNA processing body;positive regulation of dendritic spine morphogenesis	molecular_function;biological_process;biological_process;cellular_component;cellular_component;cellular_component;cellular_component;biological_process	.	.	.
ENSONIG00000021297 : ENSONIG00000021297 : ENSONIP00000026599.1	ENSONIG00000021297	621.487	yes	up	1	no	ENSONIP00000026599.1	0.871803	no	down	0.415284	no	GO:0005576;GO:0005179	extracellular region;hormone activity	cellular_component;molecular_function	ko04080;ko04730	Neuroactive ligand-receptor interaction;Long-term depression	Environmental Information Processing;Organismal Systems
ENSONIG00000019669 : ENSONIG00000019669 : ENSONIP00000024761.1	ENSONIG00000019669	0.91427	no	down	0.65396	no	ENSONIP00000024761.1	0.846154	no	down	0.037374	yes	GO:0008250;GO:0018279;GO:0004579;GO:0016021	oligosaccharyltransferase complex;protein N-linked glycosylation via asparagine;dolichyl-diphosphooligosaccharide-protein glycotransferase activity;integral to membrane	cellular_component;biological_process;molecular_function;cellular_component	ko00510	N-Glycan biosynthesis	Metabolism
ENSONIG00000007887 : ENSONIG00000007887 : ENSONIP00000009943.1	ENSONIG00000007887	1.08914	no	up	0.00765671	yes	ENSONIP00000009943.1	1.08117	no	up	0.163276	no	GO:0003723;GO:0005524;GO:0004004	RNA binding;ATP binding;ATP-dependent RNA helicase activity	molecular_function;molecular_function;molecular_function	.	.	.
ENSONIG00000013372 : ENSONIG00000013372 : ENSONIP00000034871.1	ENSONIG00000013372	0.783711	no	down	0.282888	no	ENSONIP00000034871.1	1.07111	no	up	0.408189	no	GO:0007165;GO:0005737;GO:0030159;GO:0006605;GO:0005856	signal transduction;cytoplasm;receptor signaling complex scaffold activity;protein targeting;cytoskeleton	biological_process;cellular_component;molecular_function;biological_process;cellular_component	.	.	.
ENSONIG00000013744 : ENSONIG00000013744 : ENSONIP00000017290.2	ENSONIG00000013744	0.894873	no	down	0.325313	no	ENSONIP00000017290.2	0.786544	yes	down	0.0254699	yes	GO:0044267;GO:0048471;GO:0005829;GO:0008270;GO:0005524;GO:0035556;GO:0000285;GO:0010008;GO:0030659;GO:0005515;GO:0016308	cellular protein metabolic process;perinuclear region of cytoplasm;cytosol;zinc ion binding;ATP binding;intracellular signal transduction;1-phosphatidylinositol-3-phosphate 5-kinase activity;endosome membrane;cytoplasmic vesicle membrane;protein binding;1-phosphatidylinositol-4-phosphate 5-kinase activity	biological_process;cellular_component;cellular_component;molecular_function;molecular_function;biological_process;molecular_function;cellular_component;cellular_component;molecular_function;molecular_function	ko04810;ko04666;ko04144;ko04070;ko00562	Regulation of actin cytoskeleton;Fc gamma R-mediated phagocytosis;Endocytosis;Phosphatidylinositol signaling system;Inositol phosphate metabolism	Cellular Processes;Organismal Systems;Cellular Processes;Environmental Information Processing;Metabolism
ENSONIG00000009787 : ENSONIG00000009787 : ENSONIP00000063649.1	ENSONIG00000009787	0.782888	no	down	0.000599241	yes	ENSONIP00000063649.1	1.10526	no	up	0.0220862	yes	GO:0005576;GO:0005783;GO:0005509	extracellular region;endoplasmic reticulum;calcium ion binding	cellular_component;cellular_component;molecular_function	.	.	.
ENSONIG00000017080 : ENSONIG00000017080 : ENSONIP00000044588.1	ENSONIG00000017080	0.00677017	yes	down	1	no	ENSONIP00000044588.1	1.01005	no	up	0.911777	no	GO:0042221;GO:0005576;GO:0006810;GO:0046872	response to chemical stimulus;extracellular region;transport;metal ion binding	biological_process;cellular_component;biological_process;molecular_function	.	.	.
ENSONIG00000006078 : ENSONIG00000006078 : ENSONIP00000058991.1	ENSONIG00000006078	1.25829	no	up	0.126463	no	ENSONIP00000058991.1	0.928342	no	down	0.0437376	yes	GO:0051020;GO:0005525;GO:0005085	GTPase binding;GTP binding;guanyl-nucleotide exchange factor activity	molecular_function;molecular_function;molecular_function	.	.	.
ENSONIG00000009489 : ENSONIG00000009489 : ENSONIP00000077016.1	ENSONIG00000009489	0.226006	yes	down	1.00886e-19	yes	ENSONIP00000077016.1	0.926782	no	down	0.403153	no	GO:0032982;GO:0008307;GO:0030241;GO:0030016;GO:0006939;GO:0048739;GO:0048251;GO:0005516;GO:0003779;GO:0005524	myosin filament;structural constituent of muscle;skeletal muscle myosin thick filament assembly;myofibril;smooth muscle contraction;cardiac muscle fiber development;elastic fiber assembly;calmodulin binding;actin binding;ATP binding	cellular_component;molecular_function;biological_process;cellular_component;biological_process;biological_process;biological_process;molecular_function;molecular_function;molecular_function	ko04530;ko05416	Tight junction;Viral myocarditis	Cellular Processes;Human Diseases
ENSONIG00000013231 : ENSONIG00000013231 : ENSONIP00000016637.2	ENSONIG00000013231	0.969702	no	down	0.715657	no	ENSONIP00000016637.2	0.973035	no	down	0.611245	no	.	.	.	ko05110	Vibrio cholerae infection	Human Diseases
ENSONIG00000016303 : ENSONIG00000016303 : ENSONIP00000020524.2	ENSONIG00000016303	0.990847	no	down	0.722371	no	ENSONIP00000020524.2	1.1164	no	up	0.010168	yes	GO:0005509;GO:0016020;GO:0005788;GO:0005515;GO:0003755;GO:0005528;GO:0006457	calcium ion binding;membrane;endoplasmic reticulum lumen;protein binding;peptidyl-prolyl cis-trans isomerase activity;FK506 binding;protein folding	molecular_function;cellular_component;cellular_component;molecular_function;molecular_function;molecular_function;biological_process	.	.	.
ENSONIG00000011462 : ENSONIG00000011462 : ENSONIP00000014424.1	ENSONIG00000011462	0.75778	no	down	0.0713601	no	ENSONIP00000014424.1	0.940815	no	down	0.444988	no	GO:0005576;GO:0007275	extracellular region;multicellular organismal development	cellular_component;biological_process	.	.	.
ENSONIG00000012653 : ENSONIG00000012653 : ENSONIP00000015923.1	ENSONIG00000012653	0.659613	no	down	0.000969546	yes	ENSONIP00000015923.1	0.863622	no	down	0.109942	no	GO:0005267;GO:0033017;GO:0031965;GO:0016021	potassium channel activity;sarcoplasmic reticulum membrane;nuclear membrane;integral to membrane	molecular_function;cellular_component;cellular_component;cellular_component	.	.	.
ENSONIG00000014333 : ENSONIG00000014333 : ENSONIP00000039887.1	ENSONIG00000014333	1.35068	no	up	1	no	ENSONIP00000039887.1	0.954708	no	down	0.738657	no	GO:0003779;GO:0005524;GO:0005794;GO:0000795;GO:0007269;GO:0046983;GO:0030054;GO:0048786;GO:0016874;GO:0030672	actin binding;ATP binding;Golgi apparatus;synaptonemal complex;neurotransmitter secretion;protein dimerization activity;cell junction;presynaptic active zone;ligase activity;synaptic vesicle membrane	molecular_function;molecular_function;cellular_component;cellular_component;biological_process;molecular_function;cellular_component;cellular_component;molecular_function;cellular_component	ko05131;ko04810;ko04666;ko04520;ko05100	Shigellosis;Regulation of actin cytoskeleton;Fc gamma R-mediated phagocytosis;Adherens junction;Bacterial invasion of epithelial cells	Human Diseases;Cellular Processes;Organismal Systems;Cellular Processes;Human Diseases
ENSONIG00000007075 : ENSONIG00000007075 : ENSONIP00000047753.1	ENSONIG00000007075	0.930567	no	down	0.792489	no	ENSONIP00000047753.1	0.923693	no	down	0.010155	yes	GO:0016021;GO:0016740;GO:0009451;GO:0051539;GO:0046872	integral to membrane;transferase activity;RNA modification;4 iron, 4 sulfur cluster binding;metal ion binding	cellular_component;molecular_function;biological_process;molecular_function;molecular_function	.	.	.
ENSONIG00000001148 : ENSONIG00000001148 : ENSONIP00000039168.1	ENSONIG00000001148	0.796179	no	down	0.0525796	no	ENSONIP00000039168.1	1.15595	no	up	0.099052	no	GO:0001659;GO:0045747;GO:0060019;GO:0001754;GO:0045471;GO:0048708;GO:0035259;GO:0031730;GO:0014070;GO:0046983;GO:0060397;GO:0042593;GO:0005509;GO:0019953;GO:0006606;GO:0042755;GO:0008134;GO:0004871;GO:0032355;GO:0043565;GO:0005886;GO:0003700;GO:0005634;GO:0042493;GO:0006953;GO:0019901	temperature homeostasis;positive regulation of Notch signaling pathway;radial glial cell differentiation;eye photoreceptor cell differentiation;response to ethanol;astrocyte differentiation;glucocorticoid receptor binding;CCR5 chemokine receptor binding;response to organic cyclic compound;protein dimerization activity;JAK-STAT cascade involved in growth hormone signaling pathway;glucose homeostas…	biological_process;biological_process;biological_process;biological_process;biological_process;biological_process;molecular_function;molecular_function;biological_process;molecular_function;biological_process;biological_process;molecular_function;biological_process;biological_process;biological_process;molecular_function;molecular_function;biological_process;molecular_function;cellular_component;…	ko05212;ko04920;ko05200;ko04630;ko05221;ko04062	Pancreatic cancer;Adipocytokine signaling pathway;Pathways in cancer;Jak-STAT signaling pathway;Acute myeloid leukemia;Chemokine signaling pathway	Human Diseases;Organismal Systems;Human Diseases;Environmental Information Processing;Human Diseases;Organismal Systems
ENSONIG00000018216 : ENSONIG00000018216 : ENSONIP00000022942.2	ENSONIG00000018216	1.01396	no	up	0.349086	no	ENSONIP00000022942.2	0.970762	no	down	0.522423	no	GO:0000079	regulation of cyclin-dependent protein kinase activity	biological_process	.	.	.
ENSONIG00000016029 : ENSONIG00000016029 : ENSONIP00000041720.1	ENSONIG00000016029	0.637997	no	down	9.09057e-07	yes	ENSONIP00000041720.1	0.711352	yes	down	0.00353351	yes	GO:0005198;GO:0016021	structural molecule activity;integral to membrane	molecular_function;cellular_component	.	.	.
ENSONIG00000011521 : ENSONIG00000011521 : ENSONIP00000068300.1	ENSONIG00000011521	1.77554	no	up	2.29039e-06	yes	ENSONIP00000068300.1	0.9427	no	down	0.208727	no	GO:0048495;GO:0050681;GO:0045893;GO:0005856;GO:0003713;GO:0005925;GO:0006366;GO:0007155;GO:0030521;GO:0016055;GO:0005737;GO:0030512;GO:0070411;GO:0008285;GO:0030579;GO:0010718;GO:0016363;GO:0030511;GO:0008270	Roundabout binding;androgen receptor binding;positive regulation of transcription, DNA-dependent;cytoskeleton;transcription coactivator activity;focal adhesion;transcription from RNA polymerase II promoter;cell adhesion;androgen receptor signaling pathway;Wnt receptor signaling pathway;cytoplasm;negative regulation of transforming growth factor beta receptor signaling pathway;I-SMAD binding;negat…	molecular_function;molecular_function;biological_process;cellular_component;molecular_function;cellular_component;biological_process;biological_process;biological_process;biological_process;cellular_component;biological_process;molecular_function;biological_process;biological_process;biological_process;cellular_component;biological_process;molecular_function	ko04810;ko04510;ko04670;ko05100;ko04370;ko04062	Regulation of actin cytoskeleton;Focal adhesion;Leukocyte transendothelial migration;Bacterial invasion of epithelial cells;VEGF signaling pathway;Chemokine signaling pathway	Cellular Processes;Cellular Processes;Organismal Systems;Human Diseases;Environmental Information Processing;Organismal Systems
ENSONIG00000005490 : ENSONIG00000005490 : ENSONIP00000006899.2	ENSONIG00000005490	0.957354	no	down	0.891665	no	ENSONIP00000006899.2	0.898134	no	down	0.0101732	yes	GO:0006839;GO:0021952;GO:0048484;GO:0048929;GO:0005488;GO:0005739;GO:0000226	mitochondrial transport;central nervous system projection neuron axonogenesis;enteric nervous system development;efferent axon development in posterior lateral line nerve;binding;mitochondrion;microtubule cytoskeleton organization	biological_process;biological_process;biological_process;biological_process;molecular_function;cellular_component;biological_process	.	.	.
ENSONIG00000014344 : ENSONIG00000014344 : ENSONIP00000048362.1	ENSONIG00000014344	1.00436	no	up	0.395217	no	ENSONIP00000048362.1	1.01681	no	up	0.845521	no	GO:0055085;GO:0015031;GO:0031966;GO:0016021	transmembrane transport;protein transport;mitochondrial membrane;integral to membrane	biological_process;biological_process;cellular_component;cellular_component	.	.	.
ENSONIG00000012528 : ENSONIG00000012528 : ENSONIP00000077521.1	ENSONIG00000012528	1.04996	no	up	0.0849906	no	ENSONIP00000077521.1	0.886792	no	down	0.0959862	no	GO:0005829;GO:0030366;GO:0016740	cytosol;Mo-molybdopterin synthase activity;transferase activity	cellular_component;molecular_function;molecular_function	.	.	.
ENSONIG00000013180 : ENSONIG00000013180 : ENSONIP00000016575.2	ENSONIG00000013180	0.610213	no	down	0.020547	yes	ENSONIP00000016575.2	0.841879	no	down	0.061822	no	GO:0005576;GO:0005488;GO:0016491	extracellular region;binding;oxidoreductase activity	cellular_component;molecular_function;molecular_function	.	.	.
ENSONIG00000018950 : ENSONIG00000018950 : ENSONIP00000023861.1	ENSONIG00000018950	1.05206	no	up	0.102399	no	ENSONIP00000023861.1	0.925225	no	down	0.217932	no	GO:0006355;GO:0006351	regulation of transcription, DNA-dependent;transcription, DNA-dependent	biological_process;biological_process	.	.	.
ENSONIG00000019426 : ENSONIG00000019426 : ENSONIP00000024452.1	ENSONIG00000019426	0.942747	no	down	0.916334	no	ENSONIP00000024452.1	1.10011	no	up	0.0702885	no	GO:0005484;GO:0016192;GO:0005789;GO:0006886;GO:0016021	SNAP receptor activity;vesicle-mediated transport;endoplasmic reticulum membrane;intracellular protein transport;integral to membrane	molecular_function;biological_process;cellular_component;biological_process;cellular_component	ko04130;ko04145	SNARE interactions in vesicular transport;Phagosome	Genetic Information Processing;Cellular Processes
ENSONIG00000008126 : ENSONIG00000008126 : ENSONIP00000010234.1	ENSONIG00000008126	1.06703	no	up	0.0172302	yes	ENSONIP00000010234.1	1.08151	no	up	0.47096	no	GO:0048678;GO:0001666;GO:0006810;GO:0009055;GO:0045454;GO:0005515;GO:0014070;GO:0030425;GO:0009725;GO:0006979;GO:0007584;GO:0005739;GO:0009749;GO:0031669;GO:0006662;GO:0042493;GO:0022900;GO:0043025;GO:0015035	response to axon injury;response to hypoxia;transport;electron carrier activity;cell redox homeostasis;protein binding;response to organic cyclic compound;dendrite;response to hormone stimulus;response to oxidative stress;response to nutrient;mitochondrion;response to glucose stimulus;cellular response to nutrient levels;glycerol ether metabolic process;response to drug;electron transport chain;n…	biological_process;biological_process;biological_process;molecular_function;biological_process;molecular_function;biological_process;cellular_component;biological_process;biological_process;biological_process;cellular_component;biological_process;biological_process;biological_process;biological_process;biological_process;cellular_component;molecular_function	.	.	.
ENSONIG00000004724 : ENSONIG00000004724 : ENSONIP00000005949.2	ENSONIG00000004724	1.08817	no	up	0.0267258	yes	ENSONIP00000005949.2	0.913876	no	down	0.668905	no	GO:0007165;GO:0005737;GO:0000139;GO:0005741;GO:0017124;GO:0046847;GO:0008093	signal transduction;cytoplasm;Golgi membrane;mitochondrial outer membrane;SH3 domain binding;filopodium assembly;cytoskeletal adaptor activity	biological_process;cellular_component;cellular_component;cellular_component;molecular_function;biological_process;molecular_function	ko04144	Endocytosis	Cellular Processes
ENSONIG00000011413 : ENSONIG00000011413 : ENSONIP00000014363.1	ENSONIG00000011413	1.91875	no	up	0.012362	yes	ENSONIP00000014363.1	1.16408	no	up	0.0118818	yes	GO:0005789;GO:0005874;GO:0016021;GO:0007018;GO:0005524;GO:0008017;GO:0005737;GO:0005515;GO:0003777;GO:0010165	endoplasmic reticulum membrane;microtubule;integral to membrane;microtubule-based movement;ATP binding;microtubule binding;cytoplasm;protein binding;microtubule motor activity;response to X-ray	cellular_component;cellular_component;cellular_component;biological_process;molecular_function;molecular_function;cellular_component;molecular_function;molecular_function;biological_process	ko04530;ko05416	Tight junction;Viral myocarditis	Cellular Processes;Human Diseases
ENSONIG00000009620 : ENSONIG00000009620 : ENSONIP00000012086.2	ENSONIG00000009620	0.90768	no	down	0.554263	no	ENSONIP00000012086.2	0.962709	no	down	0.280735	no	GO:0006501;GO:0015631;GO:0006621;GO:0016255;GO:0006461;GO:0042765	C-terminal protein lipidation;tubulin binding;protein retention in ER lumen;attachment of GPI anchor to protein;protein complex assembly;GPI-anchor transamidase complex	biological_process;molecular_function;biological_process;biological_process;biological_process;cellular_component	ko00563	Glycosylphosphatidylinositol(GPI	Metabolism
ENSONIG00000002675 : ENSONIG00000002675 : ENSONIP00000003350.2	ENSONIG00000002675	0.985654	no	down	0.586977	no	ENSONIP00000003350.2	0.83711	no	down	0.195003	no	GO:0004519	endonuclease activity	molecular_function	.	.	.
ENSONIG00000000518 : ENSONIG00000000518 : ENSONIP00000000662.2	ENSONIG00000000518	0.732627	no	down	0.0698025	no	ENSONIP00000000662.2	1.0844	no	up	0.420443	no	GO:0005789;GO:0004871;GO:0016021;GO:0006810;GO:0043123	endoplasmic reticulum membrane;signal transducer activity;integral to membrane;transport;positive regulation of I-kappaB kinase/NF-kappaB cascade	cellular_component;molecular_function;cellular_component;biological_process;biological_process	.	.	.
ENSONIG00000013883 : ENSONIG00000013883 : ENSONIP00000028458.1	ENSONIG00000013883	0.814145	no	down	0.119637	no	ENSONIP00000028458.1	0.855861	no	down	0.0520654	no	GO:0016021	integral to membrane	cellular_component	.	.	.
ENSONIG00000003626 : ENSONIG00000003626 : ENSONIP00000063525.1	ENSONIG00000003626	1.04494	no	up	0.122759	no	ENSONIP00000063525.1	1.06115	no	up	0.0408591	yes	.	.	.	.	.	.
ENSONIG00000014465 : ENSONIG00000014465 : ENSONIP00000018185.2	ENSONIG00000014465	1.02044	no	up	1	no	ENSONIP00000018185.2	1.04221	no	up	0.905555	no	GO:0009086;GO:0008270;GO:0008898;GO:0005737;GO:0047150	methionine biosynthetic process;zinc ion binding;homocysteine S-methyltransferase activity;cytoplasm;betaine-homocysteine S-methyltransferase activity	biological_process;molecular_function;molecular_function;cellular_component;molecular_function	ko00260;ko00270	Glycine, serine and threonine metabolism;Cysteine and methionine metabolism	Metabolism;Metabolism
ENSONIG00000002363 : ENSONIG00000002363 : ENSONIP00000002955.2	ENSONIG00000002363	1.17902	no	up	0.260209	no	ENSONIP00000002955.2	1.22013	yes	up	0.00648187	yes	GO:0005488;GO:0005578	binding;proteinaceous extracellular matrix	molecular_function;cellular_component	.	.	.
ENSONIG00000011932 : ENSONIG00000011932 : ENSONIP00000071752.1	ENSONIG00000011932	0.961235	no	down	0.86915	no	ENSONIP00000071752.1	0.953451	no	down	0.721012	no	GO:0005737;GO:0016791;GO:0016020	cytoplasm;phosphatase activity;membrane	cellular_component;molecular_function;cellular_component	ko00740;ko00730;ko00051	Riboflavin metabolism;Thiamine metabolism;Fructose and mannose metabolism	Metabolism;Metabolism;Metabolism
ENSONIG00000006762 : ENSONIG00000006762 : ENSONIP00000044594.1	ENSONIG00000006762	0.897461	no	down	0.65095	no	ENSONIP00000044594.1	1.001	no	up	0.984291	no	GO:0005737;GO:0005097	cytoplasm;Rab GTPase activator activity	cellular_component;molecular_function	.	.	.
ENSONIG00000017056 : ENSONIG00000017056 : ENSONIP00000039249.1	ENSONIG00000017056	0.895531	no	down	0.289934	no	ENSONIP00000039249.1	0.878522	no	down	0.023426	yes	GO:0006351;GO:0015031;GO:0017025;GO:0005737;GO:0003677;GO:0005634;GO:0003713;GO:0006355	transcription, DNA-dependent;protein transport;TBP-class protein binding;cytoplasm;DNA binding;nucleus;transcription coactivator activity;regulation of transcription, DNA-dependent	biological_process;biological_process;molecular_function;cellular_component;molecular_function;cellular_component;molecular_function;biological_process	.	.	.
ENSONIG00000009857 : ENSONIG00000009857 : ENSONIP00000049579.1	ENSONIG00000009857	0.845435	no	down	0.0325704	yes	ENSONIP00000049579.1	1.01342	no	up	0.757037	no	GO:0016021	integral to membrane	cellular_component	.	.	.
ENSONIG00000007474 : ENSONIG00000007474 : ENSONIP00000009422.1	ENSONIG00000007474	1.24674	no	up	5.92433e-08	yes	ENSONIP00000009422.1	0.988399	no	down	0.86682	no	GO:0005524;GO:0006388;GO:0046872;GO:0003972;GO:0005737;GO:0072669	ATP binding;tRNA splicing, via endonucleolytic cleavage and ligation;metal ion binding;RNA ligase (ATP) activity;cytoplasm;tRNA-splicing ligase complex	molecular_function;biological_process;molecular_function;molecular_function;cellular_component;cellular_component	.	.	.
ENSONIG00000013571 : ENSONIG00000013571 : ENSONIP00000017065.1	ENSONIG00000013571	1.04982	no	up	0.0837872	no	ENSONIP00000017065.1	1.02703	no	up	0.419403	no	GO:0045947;GO:0005737;GO:0000900;GO:0005515	negative regulation of translational initiation;cytoplasm;translation repressor activity, nucleic acid binding;protein binding	biological_process;cellular_component;molecular_function;molecular_function	.	.	.
ENSONIG00000009845 : ENSONIG00000009845 : ENSONIP00000030732.1	ENSONIG00000009845	0.0461355	yes	down	3.80073e-41	yes	ENSONIP00000030732.1	1.46407	yes	up	0.00572181	yes	GO:0006879;GO:0006826;GO:0008199;GO:0005576	cellular iron ion homeostasis;iron ion transport;ferric iron binding;extracellular region	biological_process;biological_process;molecular_function;cellular_component	.	.	.
ENSONIG00000000648 : ENSONIG00000000648 : ENSONIP00000000822.2	ENSONIG00000000648	1.11214	no	up	0.30664	no	ENSONIP00000000822.2	0.875	no	down	0.03828	yes	GO:0005515;GO:0005524;GO:0005003;GO:0045202;GO:0005887	protein binding;ATP binding;ephrin receptor activity;synapse;integral to plasma membrane	molecular_function;molecular_function;molecular_function;cellular_component;cellular_component	ko04360	Axon guidance	Organismal Systems
ENSONIG00000000390 : ENSONIG00000000390 : ENSONIP00000056389.1	ENSONIG00000000390	1.07474	no	up	0.473236	no	ENSONIP00000056389.1	1.0672	no	up	0.403768	no	GO:0016656;GO:0006805;GO:0005829;GO:0004364	monodehydroascorbate reductase (NADH) activity;xenobiotic metabolic process;cytosol;glutathione transferase activity	molecular_function;biological_process;cellular_component;molecular_function	.	.	.
ENSONIG00000017939 : ENSONIG00000017939 : ENSONIP00000022606.2	ENSONIG00000017939	1.14136	no	up	0.227453	no	ENSONIP00000022606.2	0.951854	no	down	0.691123	no	.	.	.	ko04070;ko04020;ko00562	Phosphatidylinositol signaling system;Calcium signaling pathway;Inositol phosphate metabolism	Environmental Information Processing;Environmental Information Processing;Metabolism
ENSONIG00000003065 : ENSONIG00000003065 : ENSONIP00000033388.1	ENSONIG00000003065	0.9019	no	down	0.404548	no	ENSONIP00000033388.1	0.984783	no	down	0.739184	no	GO:0005488;GO:0003824	binding;catalytic activity	molecular_function;molecular_function	ko05010	Alzheimer's disease	Human Diseases
ENSONIG00000002865 : ENSONIG00000002865 : ENSONIP00000003589.2	ENSONIG00000002865	0.563026	no	down	0.000133412	yes	ENSONIP00000003589.2	1.22589	yes	up	0.00678947	yes	.	.	.	ko05200;ko05222;ko04512;ko04510	Pathways in cancer;Small cell lung cancer;ECM-receptor interaction;Focal adhesion	Human Diseases;Human Diseases;Environmental Information Processing;Cellular Processes
ENSONIG00000009111 : ENSONIG00000009111 : ENSONIP00000068661.1	ENSONIG00000009111	0.644006	no	down	0.0234023	yes	ENSONIP00000068661.1	0.922756	no	down	0.0482732	yes	.	.	.	.	.	.
ENSONIG00000016598 : ENSONIG00000016598 : ENSONIP00000020906.2	ENSONIG00000016598	1.07365	no	up	0.0651976	no	ENSONIP00000020906.2	0.937359	no	down	0.459571	no	GO:0008270;GO:0016021;GO:0016491	zinc ion binding;integral to membrane;oxidoreductase activity	molecular_function;cellular_component;molecular_function	.	.	.
ENSONIG00000014744 : ENSONIG00000014744 : ENSONIP00000018563.2	ENSONIG00000014744	0.942448	no	down	0.909784	no	ENSONIP00000018563.2	1.00501	no	up	0.926028	no	GO:0005840	ribosome	cellular_component	ko03010	Ribosome	Genetic Information Processing
ENSONIG00000014536 : ENSONIG00000014536 : ENSONIP00000018291.1	ENSONIG00000014536	1.05368	no	up	0.135199	no	ENSONIP00000018291.1	1.00602	no	up	0.923791	no	GO:0016021;GO:0006783	integral to membrane;heme biosynthetic process	cellular_component;biological_process	.	.	.
ENSONIG00000005801 : ENSONIG00000005801 : ENSONIP00000007304.1	ENSONIG00000005801	1.12804	no	up	0.00461031	yes	ENSONIP00000007304.1	1.0219	no	up	0.730413	no	GO:0016459;GO:0003774;GO:0005923	myosin complex;motor activity;tight junction	cellular_component;molecular_function;cellular_component	ko04530	Tight junction	Cellular Processes
ENSONIG00000015974 : ENSONIG00000015974 : ENSONIP00000020118.2	ENSONIG00000015974	1.18721	no	up	0.00321894	yes	ENSONIP00000020118.2	0.994681	no	down	0.775147	no	GO:0006629;GO:0005576;GO:0005739;GO:0003993	lipid metabolic process;extracellular region;mitochondrion;acid phosphatase activity	biological_process;cellular_component;cellular_component;molecular_function	ko00361;ko00740	gamma-Hexachlorocyclohexane degradation;Riboflavin metabolism	Metabolism;Metabolism
ENSONIG00000016115 : ENSONIG00000016115 : ENSONIP00000035778.1	ENSONIG00000016115	1.13775	no	up	0.504074	no	ENSONIP00000035778.1	1.00568	no	up	0.910525	no	GO:0001525	angiogenesis	biological_process	.	.	.
ENSONIG00000005362 : ENSONIG00000005362 : ENSONIP00000031148.1	ENSONIG00000005362	0.788626	no	down	0.00415426	yes	ENSONIP00000031148.1	0.7991	yes	down	0.0261756	yes	GO:0004674;GO:0005524	protein serine/threonine kinase activity;ATP binding	molecular_function;molecular_function	ko04620;ko05014;ko04664;ko04912;ko04010	Toll-like receptor signaling pathway;Amyotrophic lateral sclerosis (ALS;Fc epsilon RI signaling pathway;GnRH signaling pathway;MAPK signaling pathway	Organismal Systems;Human Diseases;Organismal Systems;Organismal Systems;Environmental Information Processing
ENSONIG00000016647 : ENSONIG00000016647 : ENSONIP00000020971.2	ENSONIG00000016647	0.875586	no	down	0.150731	no	ENSONIP00000020971.2	0.910538	no	down	0.0382278	yes	GO:0004674;GO:0005739;GO:0005524	protein serine/threonine kinase activity;mitochondrion;ATP binding	molecular_function;cellular_component;molecular_function	.	.	.
ENSONIG00000014309 : ENSONIG00000014309 : ENSONIP00000017989.1	ENSONIG00000014309	0.938422	no	down	0.821842	no	ENSONIP00000017989.1	1.04221	no	up	0.623277	no	GO:0016607;GO:0008380;GO:0008270;GO:0006397;GO:0003723;GO:0000166;GO:0005681	nuclear speck;RNA splicing;zinc ion binding;mRNA processing;RNA binding;nucleotide binding;spliceosomal complex	cellular_component;biological_process;molecular_function;biological_process;molecular_function;molecular_function;cellular_component	.	.	.
ENSONIG00000009547 : ENSONIG00000009547 : ENSONIP00000011994.1	ENSONIG00000009547	1.11303	no	up	0.00247076	yes	ENSONIP00000011994.1	0.888295	no	down	0.359421	no	GO:0000785;GO:0007049;GO:0042555;GO:0006270;GO:0003677;GO:0030174;GO:0004386;GO:0009055;GO:0006268;GO:0006200;GO:0046872;GO:0005524	chromatin;cell cycle;MCM complex;DNA-dependent DNA replication initiation;DNA binding;regulation of DNA-dependent DNA replication initiation;helicase activity;electron carrier activity;DNA unwinding involved in replication;ATP catabolic process;metal ion binding;ATP binding	cellular_component;biological_process;cellular_component;biological_process;molecular_function;biological_process;molecular_function;molecular_function;biological_process;biological_process;molecular_function;molecular_function	ko04111;ko04110;ko03030;ko04113	Cell cycle - yeast;Cell cycle;DNA replication;Meiosis - yeast	Cellular Processes;Cellular Processes;Genetic Information Processing;Cellular Processes
ENSONIG00000003797 : ENSONIG00000003797 : ENSONIP00000004775.2	ENSONIG00000003797	0.863142	no	down	0.414817	no	ENSONIP00000004775.2	1.11228	no	up	0.00206375	yes	GO:0005634;GO:0003700;GO:0043565;GO:0006891;GO:0030173;GO:0000122	nucleus;sequence-specific DNA binding transcription factor activity;sequence-specific DNA binding;intra-Golgi vesicle-mediated transport;integral to Golgi membrane;negative regulation of transcription from RNA polymerase II promoter	cellular_component;molecular_function;molecular_function;biological_process;cellular_component;biological_process	.	.	.
ENSONIG00000018349 : ENSONIG00000018349 : ENSONIP00000023105.1	ENSONIG00000018349	5.36363	yes	up	1.22625e-10	yes	ENSONIP00000023105.1	1.04533	no	up	0.350842	no	GO:0016491	oxidoreductase activity	molecular_function	ko00906	Carotenoid biosynthesis	Metabolism
ENSONIG00000008970 : ENSONIG00000008970 : ENSONIP00000011279.2	ENSONIG00000008970	0.992843	no	down	0.651728	no	ENSONIP00000011279.2	0.947744	no	down	0.290907	no	GO:0005737	cytoplasm	cellular_component	.	.	.
ENSONIG00000012291 : ENSONIG00000012291 : ENSONIP00000076440.1	ENSONIG00000012291	0.504306	no	down	0.032698	yes	ENSONIP00000076440.1	0.886792	no	down	0.199839	no	.	.	.	.	.	.
ENSONIG00000017264 : ENSONIG00000017264 : ENSONIP00000021774.2	ENSONIG00000017264	0.895893	no	down	0.300862	no	ENSONIP00000021774.2	0.905367	no	down	0.12458	no	GO:0016887;GO:0005524	ATPase activity;ATP binding	molecular_function;molecular_function	.	.	.
ENSONIG00000015907 : ENSONIG00000015907 : ENSONIP00000077714.1	ENSONIG00000015907	0.967068	no	down	0.715571	no	ENSONIP00000077714.1	0.86947	no	down	0.0280479	yes	GO:0030983;GO:0006298;GO:0032301;GO:0005524;GO:0032302;GO:0007049	mismatched DNA binding;mismatch repair;MutSalpha complex;ATP binding;MutSbeta complex;cell cycle	molecular_function;biological_process;cellular_component;molecular_function;cellular_component;biological_process	ko05200;ko03430;ko05210	Pathways in cancer;Mismatch repair;Colorectal cancer	Human Diseases;Genetic Information Processing;Human Diseases
ENSONIG00000009993 : ENSONIG00000009993 : ENSONIP00000059670.1	ENSONIG00000009993	0.949499	no	down	0.992069	no	ENSONIP00000059670.1	0.881468	no	down	0.0330933	yes	GO:0006352;GO:0005654;GO:0005524;GO:0005730;GO:0031213;GO:0016887;GO:0031491;GO:0016584;GO:0006357;GO:0034080;GO:0003677;GO:0005515;GO:0000793;GO:0004386;GO:0016589	transcription initiation, DNA-dependent;nucleoplasm;ATP binding;nucleolus;RSF complex;ATPase activity;nucleosome binding;nucleosome positioning;regulation of transcription from RNA polymerase II promoter;CenH3-containing nucleosome assembly at centromere;DNA binding;protein binding;condensed chromosome;helicase activity;NURF complex	biological_process;cellular_component;molecular_function;cellular_component;cellular_component;molecular_function;molecular_function;biological_process;biological_process;biological_process;molecular_function;molecular_function;cellular_component;molecular_function;cellular_component	.	.	.
ENSONIG00000017191 : ENSONIG00000017191 : ENSONIP00000021681.1	ENSONIG00000017191	1.21313	no	up	0.0693023	no	ENSONIP00000021681.1	0.710091	yes	down	0.243519	no	.	.	.	.	.	.
ENSONIG00000011395 : ENSONIG00000011395 : ENSONIP00000040763.1	ENSONIG00000011395	1	no	down	1	no	ENSONIP00000040763.1	1.03804	no	up	0.404403	no	.	.	.	.	.	.
ENSONIG00000013367 : ENSONIG00000013367 : ENSONIP00000042829.1	ENSONIG00000013367	1.04583	no	up	0.0680502	no	ENSONIP00000042829.1	0.935182	no	down	0.0128033	yes	GO:0006897;GO:0005765;GO:0008565;GO:0000139;GO:0005515;GO:0006892;GO:0005802;GO:0030131;GO:0006886;GO:0030665;GO:0050690;GO:0005829;GO:0016032	endocytosis;lysosomal membrane;protein transporter activity;Golgi membrane;protein binding;post-Golgi vesicle-mediated transport;trans-Golgi network;clathrin adaptor complex;intracellular protein transport;clathrin coated vesicle membrane;regulation of defense response to virus by virus;cytosol;viral reproduction	biological_process;cellular_component;molecular_function;cellular_component;molecular_function;biological_process;cellular_component;cellular_component;biological_process;cellular_component;biological_process;cellular_component;biological_process	ko04142	Lysosome	Cellular Processes
ENSONIG00000003695 : ENSONIG00000003695 : ENSONIP00000050732.1	ENSONIG00000003695	1.22237	no	up	0.12182	no	ENSONIP00000050732.1	0.938288	no	down	0.328447	no	GO:0009117;GO:0016791;GO:0046872	nucleotide metabolic process;phosphatase activity;metal ion binding	biological_process;molecular_function;molecular_function	ko00910;ko00330;ko00250;ko02020	Nitrogen metabolism;Arginine and proline metabolism;Alanine, aspartate and glutamate metabolism;Two-component system	Metabolism;Metabolism;Metabolism;Environmental Information Processing
ENSONIG00000013468 : ENSONIG00000013468 : ENSONIP00000068207.1	ENSONIG00000013468	1.16298	no	up	0.0339792	yes	ENSONIP00000068207.1	0.984453	no	down	0.852829	no	GO:0032312;GO:0008270;GO:0005654;GO:0008277;GO:0008060	regulation of ARF GTPase activity;zinc ion binding;nucleoplasm;regulation of G-protein coupled receptor protein signaling pathway;ARF GTPase activator activity	biological_process;molecular_function;cellular_component;biological_process;molecular_function	ko04144	Endocytosis	Cellular Processes
ENSONIG00000010022 : ENSONIG00000010022 : ENSONIP00000038731.1	ENSONIG00000010022	1.18864	no	up	0.000109593	yes	ENSONIP00000038731.1	1.01342	no	up	0.786828	no	GO:0016021;GO:0009636;GO:0005789;GO:0019439;GO:0006805;GO:0001889;GO:0033961;GO:0019899;GO:0071385;GO:0004301;GO:0005792	integral to membrane;response to toxin;endoplasmic reticulum membrane;aromatic compound catabolic process;xenobiotic metabolic process;liver development;cis-stilbene-oxide hydrolase activity;enzyme binding;cellular response to glucocorticoid stimulus;epoxide hydrolase activity;microsome	cellular_component;biological_process;cellular_component;biological_process;biological_process;biological_process;molecular_function;molecular_function;biological_process;molecular_function;cellular_component	ko00980	Metabolism of xenobiotics by cytochrome P450	Metabolism
ENSONIG00000014217 : ENSONIG00000014217 : ENSONIP00000017869.2	ENSONIG00000014217	1.18581	no	up	0.00183878	yes	ENSONIP00000017869.2	0.99071	no	down	0.729653	no	GO:0042132;GO:0046872;GO:0006094	fructose 1,6-bisphosphate 1-phosphatase activity;metal ion binding;gluconeogenesis	molecular_function;molecular_function;biological_process	ko00710;ko00030;ko04910;ko00051;ko00010	Carbon fixation in photosynthetic organisms;Pentose phosphate pathway;Insulin signaling pathway;Fructose and mannose metabolism;Glycolysis / Gluconeogenesis	Metabolism;Metabolism;Organismal Systems;Metabolism;Metabolism
ENSONIG00000010553 : ENSONIG00000010553 : ENSONIP00000036822.1	ENSONIG00000010553	0.82194	no	down	0.0051076	yes	ENSONIP00000036822.1	1.12651	no	up	0.00794242	yes	GO:0005576;GO:0060271;GO:0005856;GO:0051693;GO:0003779;GO:0005737	extracellular region;cilium morphogenesis;cytoskeleton;actin filament capping;actin binding;cytoplasm	cellular_component;biological_process;cellular_component;biological_process;molecular_function;cellular_component	ko04810;ko04666	Regulation of actin cytoskeleton;Fc gamma R-mediated phagocytosis	Cellular Processes;Organismal Systems
ENSONIG00000000106 : ENSONIG00000000106 : ENSONIP00000031424.1	ENSONIG00000000106	0.358173	yes	down	1.16354e-06	yes	ENSONIP00000031424.1	0.786246	yes	down	0.016904	yes	GO:0009060;GO:0006090;GO:0072592;GO:0005759;GO:0006108;GO:0051287;GO:0046872;GO:0004473	aerobic respiration;pyruvate metabolic process;oxygen metabolic process;mitochondrial matrix;malate metabolic process;NAD binding;metal ion binding;malate dehydrogenase (oxaloacetate-decarboxylating) (NADP+) activity	biological_process;biological_process;biological_process;cellular_component;biological_process;molecular_function;molecular_function;molecular_function	ko00620;ko00710	Pyruvate metabolism;Carbon fixation in photosynthetic organisms	Metabolism;Metabolism
ENSONIG00000003649 : ENSONIG00000003649 : ENSONIP00000066422.1	ENSONIG00000003649	0.729544	no	down	6.15369e-05	yes	ENSONIP00000066422.1	0.751313	yes	down	0.00201877	yes	GO:0007155;GO:0019899;GO:0004872;GO:0043202;GO:0006622;GO:0005887;GO:0005765;GO:0005624	cell adhesion;enzyme binding;receptor activity;lysosomal lumen;protein targeting to lysosome;integral to plasma membrane;lysosomal membrane;membrane fraction	biological_process;molecular_function;molecular_function;cellular_component;biological_process;cellular_component;cellular_component;cellular_component	ko04142	Lysosome	Cellular Processes
ENSONIG00000006163 : ENSONIG00000006163 : ENSONIP00000052127.1	ENSONIG00000006163	1.414	no	up	0.000194039	yes	ENSONIP00000052127.1	0.930801	no	down	0.125199	no	.	.	.	.	.	.
ENSONIG00000007805 : ENSONIG00000007805 : ENSONIP00000009828.2	ENSONIG00000007805	1	no	down	1	no	ENSONIP00000009828.2	1.00702	no	up	0.65547	no	.	.	.	.	.	.
ENSONIG00000019125 : ENSONIG00000019125 : ENSONIP00000024072.1	ENSONIG00000019125	0.915301	no	down	0.707366	no	ENSONIP00000024072.1	0.970443	no	down	0.58395	no	GO:0005576;GO:0016491	extracellular region;oxidoreductase activity	cellular_component;molecular_function	.	.	.
ENSONIG00000013121 : ENSONIG00000013121 : ENSONIP00000050466.1	ENSONIG00000013121	0.905747	no	down	0.547595	no	ENSONIP00000050466.1	0.873517	no	down	0.015308	yes	.	.	.	.	.	.
ENSONIG00000005874 : ENSONIG00000005874 : ENSONIP00000055538.1	ENSONIG00000005874	0.886265	no	down	0.331467	no	ENSONIP00000055538.1	0.957259	no	down	0.347654	no	GO:0005737;GO:0042273;GO:0000922;GO:0008283;GO:0043022;GO:0006364;GO:0042256;GO:0003723;GO:0045727;GO:0005730;GO:0005654	cytoplasm;ribosomal large subunit biogenesis;spindle pole;cell proliferation;ribosome binding;rRNA processing;mature ribosome assembly;RNA binding;positive regulation of translation;nucleolus;nucleoplasm	cellular_component;biological_process;cellular_component;biological_process;molecular_function;biological_process;biological_process;molecular_function;biological_process;cellular_component;cellular_component	.	.	.
ENSONIG00000014086 : ENSONIG00000014086 : ENSONIP00000017706.1	ENSONIG00000014086	0.909373	no	down	0.482925	no	ENSONIP00000017706.1	0.91664	no	down	0.0602351	no	GO:0000178;GO:0005730;GO:0003723;GO:0006364	exosome (RNase complex);nucleolus;RNA binding;rRNA processing	cellular_component;cellular_component;molecular_function;biological_process	ko03018	RNA degradation	Genetic Information Processing
ENSONIG00000014266 : ENSONIG00000014266 : ENSONIP00000035880.1	ENSONIG00000014266	0.953645	no	down	0.952619	no	ENSONIP00000035880.1	0.9427	no	down	0.137135	no	GO:0005840;GO:0006412;GO:0003735	ribosome;translation;structural constituent of ribosome	cellular_component;biological_process;molecular_function	ko03010	Ribosome	Genetic Information Processing
ENSONIG00000001811 : ENSONIG00000001811 : ENSONIP00000002266.1	ENSONIG00000001811	1.15475	no	up	0.116109	no	ENSONIP00000002266.1	1.0284	no	up	0.783991	no	GO:0009887;GO:0045725;GO:0043560;GO:0005524;GO:0071363;GO:0051425;GO:0031017;GO:0043548;GO:0042169;GO:0016021;GO:0030238;GO:0051290;GO:0005009;GO:0046777;GO:0005901;GO:0046872;GO:0043559	organ morphogenesis;positive regulation of glycogen biosynthetic process;insulin receptor substrate binding;ATP binding;cellular response to growth factor stimulus;PTB domain binding;exocrine pancreas development;phosphatidylinositol 3-kinase binding;SH2 domain binding;integral to membrane;male sex determination;protein heterotetramerization;insulin-activated receptor activity;protein autophospho…	biological_process;biological_process;molecular_function;molecular_function;biological_process;molecular_function;biological_process;molecular_function;molecular_function;cellular_component;biological_process;biological_process;molecular_function;biological_process;cellular_component;molecular_function;molecular_function	ko04960;ko04520;ko04910;ko04930	Aldosterone-regulated sodium reabsorption;Adherens junction;Insulin signaling pathway;Type II diabetes mellitus	Organismal Systems;Cellular Processes;Organismal Systems;Human Diseases
ENSONIG00000014208 : ENSONIG00000014208 : ENSONIP00000043994.1	ENSONIG00000014208	1.06692	no	up	0.0550343	no	ENSONIP00000043994.1	0.980852	no	down	0.558021	no	GO:0008180;GO:0005737;GO:0046872;GO:0008237	signalosome;cytoplasm;metal ion binding;metallopeptidase activity	cellular_component;cellular_component;molecular_function;molecular_function	.	.	.
ENSONIG00000003197 : ENSONIG00000003197 : ENSONIP00000004010.1	ENSONIG00000003197	1.06761	no	up	0.0664383	no	ENSONIP00000004010.1	1.02497	no	up	0.232928	no	GO:0000166;GO:0003723;GO:0005737;GO:0005634;GO:0070935	nucleotide binding;RNA binding;cytoplasm;nucleus;3'-UTR-mediated mRNA stabilization	molecular_function;molecular_function;cellular_component;cellular_component;biological_process	ko04320	Dorso-ventral axis formation	Organismal Systems
ENSONIG00000001218 : ENSONIG00000001218 : ENSONIP00000001540.2	ENSONIG00000001218	1.0275	no	up	0.330555	no	ENSONIP00000001540.2	0.849568	no	down	0.23984	no	GO:0003676;GO:0005515;GO:0007283;GO:0043186;GO:0007275;GO:0005783;GO:0007281;GO:0033391	nucleic acid binding;protein binding;spermatogenesis;P granule;multicellular organismal development;endoplasmic reticulum;germ cell development;chromatoid body	molecular_function;molecular_function;biological_process;cellular_component;biological_process;cellular_component;biological_process;cellular_component	.	.	.
ENSONIG00000013036 : ENSONIG00000013036 : ENSONIP00000016395.1	ENSONIG00000013036	1.02175	no	up	0.196413	no	ENSONIP00000016395.1	0.94742	no	down	0.284683	no	GO:0005737;GO:0008180	cytoplasm;signalosome	cellular_component;cellular_component	.	.	.
ENSONIG00000016396 : ENSONIG00000016396 : ENSONIP00000038207.1	ENSONIG00000016396	0.917608	no	down	0.862514	no	ENSONIP00000038207.1	0.866833	no	down	0.00309872	yes	GO:0015171;GO:0016021	amino acid transmembrane transporter activity;integral to membrane	molecular_function;cellular_component	.	.	.
ENSONIG00000002329 : ENSONIG00000002329 : ENSONIP00000053287.1	ENSONIG00000002329	0.208467	yes	down	1.5628e-32	yes	ENSONIP00000053287.1	0.78648	yes	down	0.00247494	yes	GO:0005778;GO:0005634;GO:0051260;GO:0016021;GO:0047485;GO:0016558;GO:0003714;GO:0043234;GO:0055085;GO:0045892;GO:0043433	peroxisomal membrane;nucleus;protein homooligomerization;integral to membrane;protein N-terminus binding;protein import into peroxisome matrix;transcription corepressor activity;protein complex;transmembrane transport;negative regulation of transcription, DNA-dependent;negative regulation of sequence-specific DNA binding transcription factor activity	cellular_component;cellular_component;biological_process;cellular_component;molecular_function;biological_process;molecular_function;cellular_component;biological_process;biological_process;biological_process	.	.	.
ENSONIG00000014186 : ENSONIG00000014186 : ENSONIP00000033669.1	ENSONIG00000014186	1.03454	no	up	0.142871	no	ENSONIP00000033669.1	0.963351	no	down	0.618558	no	GO:0005515;GO:0016192;GO:0031572;GO:0007049;GO:0015031;GO:0005789	protein binding;vesicle-mediated transport;G2/M transition DNA damage checkpoint;cell cycle;protein transport;endoplasmic reticulum membrane	molecular_function;biological_process;biological_process;biological_process;biological_process;cellular_component	.	.	.
ENSONIG00000001104 : ENSONIG00000001104 : ENSONIP00000001398.2	ENSONIG00000001104	0.947158	no	down	0.979878	no	ENSONIP00000001398.2	0.865941	no	down	0.0138749	yes	GO:0016149;GO:0005739	translation release factor activity, codon specific;mitochondrion	molecular_function;cellular_component	.	.	.
ENSONIG00000011261 : ENSONIG00000011261 : ENSONIP00000014173.2	ENSONIG00000011261	0.812067	no	down	0.0243972	yes	ENSONIP00000014173.2	0.940492	no	down	0.0276906	yes	GO:0005524;GO:0045821;GO:0010508;GO:0042149;GO:0042752;GO:0003682;GO:0070301;GO:0031588;GO:2000505;GO:0071361;GO:0017148;GO:0014823;GO:0071456;GO:0032007;GO:0005634;GO:0071417;GO:0006695;GO:0060627;GO:0016324;GO:0008022;GO:0008284;GO:0046326;GO:0006633;GO:0046321;GO:0019900;GO:0051291;GO:0055089;GO:0035174;GO:0004679;GO:0046872;GO:0042593;GO:0050995;GO:0043066;GO:0005737;GO:0031000;GO:0042557;GO:…	ATP binding;positive regulation of glycolysis;positive regulation of autophagy;cellular response to glucose starvation;regulation of circadian rhythm;chromatin binding;cellular response to hydrogen peroxide;AMP-activated protein kinase complex;regulation of energy homeostasis;cellular response to ethanol;negative regulation of translation;response to activity;cellular response to hypoxia;negative…	molecular_function;biological_process;biological_process;biological_process;biological_process;molecular_function;biological_process;cellular_component;biological_process;biological_process;biological_process;biological_process;biological_process;biological_process;cellular_component;biological_process;biological_process;biological_process;cellular_component;molecular_function;biological_process;…	ko04150;ko05410;ko04920;ko04910;ko04140	mTOR signaling pathway;Hypertrophic cardiomyopathy (HCM;Adipocytokine signaling pathway;Insulin signaling pathway;Regulation of autophagy	Environmental Information Processing;Human Diseases;Organismal Systems;Organismal Systems;Cellular Processes
ENSONIG00000002696 : ENSONIG00000002696 : ENSONIP00000003381.2	ENSONIG00000002696	0.987417	no	down	0.643874	no	ENSONIP00000003381.2	0.841056	no	down	0.00170818	yes	GO:0005783;GO:0005654;GO:0060333;GO:0005515;GO:0060334;GO:0008286	endoplasmic reticulum;nucleoplasm;interferon-gamma-mediated signaling pathway;protein binding;regulation of interferon-gamma-mediated signaling pathway;insulin receptor signaling pathway	cellular_component;cellular_component;biological_process;molecular_function;biological_process;biological_process	.	.	.
ENSONIG00000013049 : ENSONIG00000013049 : ENSONIP00000016411.2	ENSONIG00000013049	0.932096	no	down	0.758566	no	ENSONIP00000016411.2	1.07074	no	up	0.204379	no	GO:0008380;GO:0006397;GO:0009790;GO:0008270;GO:0000166;GO:0003723;GO:0005681	RNA splicing;mRNA processing;embryo development;zinc ion binding;nucleotide binding;RNA binding;spliceosomal complex	biological_process;biological_process;biological_process;molecular_function;molecular_function;molecular_function;cellular_component	.	.	.
ENSONIG00000006840 : ENSONIG00000006840 : ENSONIP00000008631.2	ENSONIG00000006840	1.16493	no	up	0.0146334	yes	ENSONIP00000008631.2	1.03081	no	up	0.428842	no	GO:0005765;GO:0060155;GO:0031083;GO:0006892;GO:0005515;GO:0032438	lysosomal membrane;platelet dense granule organization;BLOC-1 complex;post-Golgi vesicle-mediated transport;protein binding;melanosome organization	cellular_component;biological_process;cellular_component;biological_process;molecular_function;biological_process	.	.	.
ENSONIG00000014986 : ENSONIG00000014986 : ENSONIP00000058377.1	ENSONIG00000014986	0.693731	no	down	1.74241e-07	yes	ENSONIP00000058377.1	0.911727	no	down	0.100419	no	GO:0016021	integral to membrane	cellular_component	.	.	.
ENSONIG00000004463 : ENSONIG00000004463 : ENSONIP00000005619.1	ENSONIG00000004463	1.11053	no	up	0.0579663	no	ENSONIP00000005619.1	0.971091	no	down	0.113714	no	GO:0045335;GO:0008168;GO:0005813	phagocytic vesicle;methyltransferase activity;centrosome	cellular_component;molecular_function;cellular_component	.	.	.
ENSONIG00000001599 : ENSONIG00000001599 : ENSONIP00000051983.1	ENSONIG00000001599	0.871889	no	down	0.185581	no	ENSONIP00000051983.1	0.886199	no	down	0.0581419	no	GO:0005624;GO:0007601;GO:0042626;GO:0005524;GO:0007603;GO:0005887	membrane fraction;visual perception;ATPase activity, coupled to transmembrane movement of substances;ATP binding;phototransduction, visible light;integral to plasma membrane	cellular_component;biological_process;molecular_function;molecular_function;biological_process;cellular_component	ko02010	ABC transporters	Environmental Information Processing
ENSONIG00000008710 : ENSONIG00000008710 : ENSONIP00000010946.1	ENSONIG00000008710	1.00402	no	up	0.271839	no	ENSONIP00000010946.1	0.905079	no	down	0.111779	no	GO:0043066;GO:0008285;GO:0007166;GO:0005737;GO:0055085;GO:0005643;GO:0008219;GO:0043130;GO:0030159;GO:0043123;GO:0045893;GO:0000922;GO:0017056;GO:0046966;GO:0015031;GO:0051028;GO:0006351;GO:0042169	negative regulation of apoptosis;negative regulation of cell proliferation;cell surface receptor linked signaling pathway;cytoplasm;transmembrane transport;nuclear pore;cell death;ubiquitin binding;receptor signaling complex scaffold activity;positive regulation of I-kappaB kinase/NF-kappaB cascade;positive regulation of transcription, DNA-dependent;spindle pole;structural constituent of nuclear …	biological_process;biological_process;biological_process;cellular_component;biological_process;cellular_component;biological_process;molecular_function;molecular_function;biological_process;biological_process;cellular_component;molecular_function;molecular_function;biological_process;biological_process;biological_process;molecular_function	ko04080	Neuroactive ligand-receptor interaction	Environmental Information Processing
ENSONIG00000002998 : ENSONIG00000002998 : ENSONIP00000079054.1	ENSONIG00000002998	0.961994	no	down	0.890429	no	ENSONIP00000079054.1	0.745492	yes	down	0.174742	no	GO:0005488	binding	molecular_function	.	.	.
ENSONIG00000008691 : ENSONIG00000008691 : ENSONIP00000010925.2	ENSONIG00000008691	0.320886	yes	down	9.29669e-05	yes	ENSONIP00000010925.2	0.864823	no	down	0.00585204	yes	GO:0004029;GO:0016021;GO:0006081;GO:0004030;GO:0005789;GO:0005743	aldehyde dehydrogenase (NAD) activity;integral to membrane;cellular aldehyde metabolic process;aldehyde dehydrogenase [NAD(P)+] activity;endoplasmic reticulum membrane;mitochondrial inner membrane	molecular_function;cellular_component;biological_process;molecular_function;cellular_component;cellular_component	ko00330;ko00280;ko00010;ko00640;ko00340;ko00650;ko00071;ko00380;ko00310;ko00903;ko00410;ko00620;ko00053;ko00561	Arginine and proline metabolism;Valine, leucine and isoleucine degradation;Glycolysis / Gluconeogenesis;Propanoate metabolism;Histidine metabolism;Butanoate metabolism;Fatty acid metabolism;Tryptophan metabolism;Lysine degradation;Limonene and pinene degradation;beta-Alanine metabolism;Pyruvate metabolism;Ascorbate and aldarate metabolism;Glycerolipid metabolism	Metabolism;Metabolism;Metabolism;Metabolism;Metabolism;Metabolism;Metabolism;Metabolism;Metabolism;Metabolism;Metabolism;Metabolism;Metabolism;Metabolism
ENSONIG00000008740 : ENSONIG00000008740 : ENSONIP00000065512.1	ENSONIG00000008740	1.03184	no	up	0.120677	no	ENSONIP00000065512.1	0.896018	no	down	0.00975909	yes	GO:0006810;GO:0005874;GO:0030286;GO:0003774;GO:0031982	transport;microtubule;dynein complex;motor activity;vesicle	biological_process;cellular_component;cellular_component;molecular_function;cellular_component	ko04962;ko04145	Vasopressin-regulated water reabsorption;Phagosome	Organismal Systems;Cellular Processes
ENSONIG00000016768 : ENSONIG00000016768 : ENSONIP00000036623.1	ENSONIG00000016768	0.669669	no	down	0.00591686	yes	ENSONIP00000036623.1	0.891236	no	down	0.0223697	yes	GO:0032420;GO:0005525;GO:0005829;GO:0060326;GO:0016020;GO:0005085;GO:0012505;GO:0017124	stereocilium;GTP binding;cytosol;cell chemotaxis;membrane;guanyl-nucleotide exchange factor activity;endomembrane system;SH3 domain binding	cellular_component;molecular_function;cellular_component;biological_process;cellular_component;molecular_function;cellular_component;molecular_function	.	.	.
ENSONIG00000012257 : ENSONIG00000012257 : ENSONIP00000063987.1	ENSONIG00000012257	0.92079	no	down	0.598968	no	ENSONIP00000063987.1	0.976606	no	down	0.672446	no	GO:0006886;GO:0005096;GO:0005625;GO:0046982;GO:0005737	intracellular protein transport;GTPase activator activity;soluble fraction;protein heterodimerization activity;cytoplasm	biological_process;molecular_function;cellular_component;molecular_function;cellular_component	.	.	.
ENSONIG00000012005 : ENSONIG00000012005 : ENSONIP00000015112.1	ENSONIG00000012005	1.00211	no	up	0.545645	no	ENSONIP00000015112.1	0.963993	no	down	0.812706	no	GO:0005576	extracellular region	cellular_component	.	.	.
ENSONIG00000010849 : ENSONIG00000010849 : ENSONIP00000054475.1	ENSONIG00000010849	0.929575	no	down	0.804262	no	ENSONIP00000054475.1	1.03459	no	up	0.0508083	no	GO:0005524;GO:0003774;GO:0003779;GO:0060171;GO:0005737	ATP binding;motor activity;actin binding;stereocilium membrane;cytoplasm	molecular_function;molecular_function;molecular_function;cellular_component;cellular_component	.	.	.
ENSONIG00000017769 : ENSONIG00000017769 : ENSONIP00000027598.1	ENSONIG00000017769	1.57269	no	up	7.73836e-16	yes	ENSONIP00000027598.1	1.04499	no	up	0.463766	no	GO:0030154;GO:0030036;GO:0001726;GO:0007275;GO:0001503;GO:0001725;GO:0008270;GO:0005737;GO:0005515	cell differentiation;actin cytoskeleton organization;ruffle;multicellular organismal development;ossification;stress fiber;zinc ion binding;cytoplasm;protein binding	biological_process;biological_process;cellular_component;biological_process;biological_process;cellular_component;molecular_function;cellular_component;molecular_function	.	.	.
ENSONIG00000019610 : ENSONIG00000019610 : ENSONIP00000038620.1	ENSONIG00000019610	0.627651	no	down	3.95819e-10	yes	ENSONIP00000038620.1	1.11526	no	up	0.235826	no	GO:0016020;GO:0006366;GO:0005794;GO:0005515;GO:0005634;GO:0005856;GO:0003713	membrane;transcription from RNA polymerase II promoter;Golgi apparatus;protein binding;nucleus;cytoskeleton;transcription coactivator activity	cellular_component;biological_process;cellular_component;molecular_function;cellular_component;cellular_component;molecular_function	.	.	.
ENSONIG00000019155 : ENSONIG00000019155 : ENSONIP00000067380.1	ENSONIG00000019155	0.895706	no	down	0.683909	no	ENSONIP00000067380.1	1.13944	no	up	0.0156547	yes	GO:0016021;GO:0012505	integral to membrane;endomembrane system	cellular_component;cellular_component	ko04144;ko04120	Endocytosis;Ubiquitin mediated proteolysis	Cellular Processes;Genetic Information Processing
ENSONIG00000011440 : ENSONIG00000011440 : ENSONIP00000014398.2	ENSONIG00000011440	0.765112	no	down	0.00353166	yes	ENSONIP00000014398.2	0.845846	no	down	0.000325439	yes	GO:0048471;GO:0005102;GO:0005524;GO:0004672;GO:0008333;GO:0005794;GO:0002092;GO:2000370;GO:0010008;GO:0090090;GO:0030136	perinuclear region of cytoplasm;receptor binding;ATP binding;protein kinase activity;endosome to lysosome transport;Golgi apparatus;positive regulation of receptor internalization;positive regulation of clathrin-mediated endocytosis;endosome membrane;negative regulation of canonical Wnt receptor signaling pathway;clathrin-coated vesicle	cellular_component;molecular_function;molecular_function;molecular_function;biological_process;cellular_component;biological_process;biological_process;cellular_component;biological_process;cellular_component	.	.	.
ENSONIG00000004904 : ENSONIG00000004904 : ENSONIP00000006165.1	ENSONIG00000004904	0.984061	no	down	0.722716	no	ENSONIP00000006165.1	0.998668	no	down	0.962774	no	GO:0005634	nucleus	cellular_component	ko04270;ko05131;ko04510;ko04350;ko04670;ko04360;ko05130;ko04062;ko04810;ko04310;ko04530;ko05416	Vascular smooth muscle contraction;Shigellosis;Focal adhesion;TGF-beta signaling pathway;Leukocyte transendothelial migration;Axon guidance;Pathogenic Escherichia coli infection;Chemokine signaling pathway;Regulation of actin cytoskeleton;Wnt signaling pathway;Tight junction;Viral myocarditis	Organismal Systems;Human Diseases;Cellular Processes;Environmental Information Processing;Organismal Systems;Organismal Systems;Human Diseases;Organismal Systems;Cellular Processes;Environmental Information Processing;Cellular Processes;Human Diseases
ENSONIG00000011007 : ENSONIG00000011007 : ENSONIP00000075996.1	ENSONIG00000011007	1.04421	no	up	0.127635	no	ENSONIP00000075996.1	0.981182	no	down	0.755066	no	GO:0005829;GO:0007155;GO:0003779;GO:0005925;GO:0060271;GO:0015629;GO:0034329	cytosol;cell adhesion;actin binding;focal adhesion;cilium morphogenesis;actin cytoskeleton;cell junction assembly	cellular_component;biological_process;molecular_function;cellular_component;biological_process;cellular_component;biological_process	ko04510	Focal adhesion	Cellular Processes
ENSONIG00000013457 : ENSONIG00000013457 : ENSONIP00000016922.2	ENSONIG00000013457	1.11775	no	up	0.0140837	yes	ENSONIP00000016922.2	0.963351	no	down	0.388307	no	GO:0005739;GO:0006412;GO:0003735;GO:0005840	mitochondrion;translation;structural constituent of ribosome;ribosome	cellular_component;biological_process;molecular_function;cellular_component	.	.	.
ENSONIG00000004888 : ENSONIG00000004888 : ENSONIP00000006146.2	ENSONIG00000004888	1.0218	no	up	0.156687	no	ENSONIP00000006146.2	1.03494	no	up	0.414643	no	.	.	.	ko04120	Ubiquitin mediated proteolysis	Genetic Information Processing
ENSONIG00000020377 : ENSONIG00000020377 : ENSONIP00000034956.1	ENSONIG00000020377	0.870735	no	down	0.383239	no	ENSONIP00000034956.1	1.25056	yes	up	0.0152779	yes	GO:0010859;GO:0005515	calcium-dependent cysteine-type endopeptidase inhibitor activity;protein binding	molecular_function;molecular_function	.	.	.
ENSONIG00000011589 : ENSONIG00000011589 : ENSONIP00000047397.1	ENSONIG00000011589	0.873213	no	down	0.449665	no	ENSONIP00000047397.1	1.00334	no	up	0.943725	no	GO:0005925;GO:0032587;GO:0015629;GO:0005200;GO:0005158;GO:0007155;GO:0005829;GO:0003779;GO:0007016	focal adhesion;ruffle membrane;actin cytoskeleton;structural constituent of cytoskeleton;insulin receptor binding;cell adhesion;cytosol;actin binding;cytoskeletal anchoring at plasma membrane	cellular_component;cellular_component;cellular_component;molecular_function;molecular_function;biological_process;cellular_component;molecular_function;biological_process	ko04510	Focal adhesion	Cellular Processes
ENSONIG00000010248 : ENSONIG00000010248 : ENSONIP00000029371.1	ENSONIG00000010248	0.768138	no	down	4.92416e-05	yes	ENSONIP00000029371.1	0.893939	no	down	0.0223359	yes	GO:0016055;GO:0030275;GO:0009950	Wnt receptor signaling pathway;LRR domain binding;dorsal/ventral axis specification	biological_process;molecular_function;biological_process	ko04530;ko05416	Tight junction;Viral myocarditis	Cellular Processes;Human Diseases
ENSONIG00000016941 : ENSONIG00000016941 : ENSONIP00000042763.1	ENSONIG00000016941	0.989628	no	down	0.488382	no	ENSONIP00000042763.1	0.89962	no	down	0.0340739	yes	GO:0016881;GO:0045116;GO:0005524;GO:0008641	acid-amino acid ligase activity;protein neddylation;ATP binding;small protein activating enzyme activity	molecular_function;biological_process;molecular_function;molecular_function	ko04120	Ubiquitin mediated proteolysis	Genetic Information Processing
ENSONIG00000000146 : ENSONIG00000000146 : ENSONIP00000047065.1	ENSONIG00000000146	0.954746	no	down	0.925829	no	ENSONIP00000047065.1	0.941748	no	down	0.60854	no	.	.	.	.	.	.
ENSONIG00000006727 : ENSONIG00000006727 : ENSONIP00000008498.1	ENSONIG00000006727	0.910047	no	down	0.598257	no	ENSONIP00000008498.1	0.90993	no	down	0.102673	no	GO:0006508;GO:0005634;GO:0004198	proteolysis;nucleus;calcium-dependent cysteine-type endopeptidase activity	biological_process;cellular_component;molecular_function	.	.	.
ENSONIG00000017586 : ENSONIG00000017586 : ENSONIP00000079664.1	ENSONIG00000017586	0.83665	no	down	0.02529	yes	ENSONIP00000079664.1	1.03666	no	up	0.397491	no	GO:0005524;GO:0005741;GO:0005778;GO:0005789;GO:0006631;GO:0004467;GO:0005792	ATP binding;mitochondrial outer membrane;peroxisomal membrane;endoplasmic reticulum membrane;fatty acid metabolic process;long-chain fatty acid-CoA ligase activity;microsome	molecular_function;cellular_component;cellular_component;cellular_component;biological_process;molecular_function;cellular_component	ko04146;ko00071;ko04920;ko03320	Peroxisome;Fatty acid metabolism;Adipocytokine signaling pathway;PPAR signaling pathway	Cellular Processes;Metabolism;Organismal Systems;Organismal Systems
ENSONIG00000019940 : ENSONIG00000019940 : ENSONIP00000032816.1	ENSONIG00000019940	312.103	yes	up	1	no	ENSONIP00000032816.1	3.93421	yes	up	1.00747e-05	yes	.	.	.	ko05320;ko04612;ko05416;ko05332;ko05310;ko04940;ko04514;ko04145;ko05140;ko05330;ko05322;ko04672	Autoimmune thyroid disease;Antigen processing and presentation;Viral myocarditis;Graft-versus-host disease;Asthma;Type I diabetes mellitus;Cell adhesion molecules (CAMs;Phagosome;Leishmaniasis;Allograft rejection;Systemic lupus erythematosus;Intestinal immune network for IgA production	Human Diseases;Organismal Systems;Human Diseases;Human Diseases;Human Diseases;Human Diseases;Environmental Information Processing;Cellular Processes;Human Diseases;Human Diseases;Human Diseases;Organismal Systems
ENSONIG00000017506 : ENSONIG00000017506 : ENSONIP00000022075.2	ENSONIG00000017506	1.00929	no	up	0.214319	no	ENSONIP00000022075.2	0.999	no	down	0.970127	no	GO:0010008;GO:0046872	endosome membrane;metal ion binding	cellular_component;molecular_function	.	.	.
ENSONIG00000004891 : ENSONIG00000004891 : ENSONIP00000006149.2	ENSONIG00000004891	1.01184	no	up	0.314787	no	ENSONIP00000006149.2	0.953761	no	down	0.0875626	no	GO:0034063;GO:0005737;GO:0003777;GO:0030286;GO:0005515;GO:0007018;GO:0006810;GO:0016887;GO:0005874;GO:0005524;GO:0033962	stress granule assembly;cytoplasm;microtubule motor activity;dynein complex;protein binding;microtubule-based movement;transport;ATPase activity;microtubule;ATP binding;cytoplasmic mRNA processing body assembly	biological_process;cellular_component;molecular_function;cellular_component;molecular_function;biological_process;biological_process;molecular_function;cellular_component;molecular_function;biological_process	ko04145;ko04962	Phagosome;Vasopressin-regulated water reabsorption	Cellular Processes;Organismal Systems
ENSONIG00000012977 : ENSONIG00000012977 : ENSONIP00000074605.1	ENSONIG00000012977	1.08437	no	up	0.107163	no	ENSONIP00000074605.1	0.922756	no	down	0.0170088	yes	GO:0005739;GO:0008483;GO:0030170	mitochondrion;transaminase activity;pyridoxal phosphate binding	cellular_component;molecular_function;molecular_function	.	.	.
ENSONIG00000011083 : ENSONIG00000011083 : ENSONIP00000067475.1	ENSONIG00000011083	0.999378	no	down	0.362979	no	ENSONIP00000067475.1	0.939541	no	down	0.126307	no	GO:0007051;GO:0005813;GO:0005096;GO:0046604;GO:0046907	spindle organization;centrosome;GTPase activator activity;positive regulation of mitotic centrosome separation;intracellular transport	biological_process;cellular_component;molecular_function;biological_process;biological_process	.	.	.
ENSONIG00000015980 : ENSONIG00000015980 : ENSONIP00000027636.1	ENSONIG00000015980	1.1366	no	up	0.065776	no	ENSONIP00000027636.1	0.922781	no	down	0.124734	no	GO:0005634;GO:0005624;GO:0046856;GO:0004438;GO:0005737;GO:0016020;GO:0004722;GO:0004725;GO:0046872	nucleus;membrane fraction;phosphatidylinositol dephosphorylation;phosphatidylinositol-3-phosphatase activity;cytoplasm;membrane;protein serine/threonine phosphatase activity;protein tyrosine phosphatase activity;metal ion binding	cellular_component;cellular_component;biological_process;molecular_function;cellular_component;cellular_component;molecular_function;molecular_function;molecular_function	.	.	.
ENSONIG00000012027 : ENSONIG00000012027 : ENSONIP00000015140.2	ENSONIG00000012027	1.03998	no	up	0.0769782	no	ENSONIP00000015140.2	0.924928	no	down	0.302207	no	GO:0040008;GO:0090263;GO:0050775;GO:0017148;GO:2000055;GO:0003723;GO:0061003;GO:0005737;GO:0009953	regulation of growth;positive regulation of canonical Wnt receptor signaling pathway;positive regulation of dendrite morphogenesis;negative regulation of translation;positive regulation of Wnt receptor signaling pathway involved in dorsal/ventral axis specification;RNA binding;positive regulation of dendritic spine morphogenesis;cytoplasm;dorsal/ventral pattern formation	biological_process;biological_process;biological_process;biological_process;biological_process;molecular_function;biological_process;cellular_component;biological_process	ko04610;ko05322;ko05142;ko05020	Complement and coagulation cascades;Systemic lupus erythematosus;Chagas disease;Prion diseases	Organismal Systems;Human Diseases;Human Diseases;Human Diseases
ENSONIG00000019408 : ENSONIG00000019408 : ENSONIP00000035345.1	ENSONIG00000019408	0.864246	no	down	0.529247	no	ENSONIP00000035345.1	0.923077	no	down	0.0197256	yes	GO:0019233;GO:0006351;GO:0005654;GO:0005524;GO:0004707;GO:0051216;GO:2000657;GO:0031663;GO:0009887;GO:0001784;GO:0051090;GO:0043330;GO:0031143;GO:0007049;GO:0006974	sensory perception of pain;transcription, DNA-dependent;nucleoplasm;ATP binding;MAP kinase activity;cartilage development;negative regulation of apolipoprotein binding;lipopolysaccharide-mediated signaling pathway;organ morphogenesis;phosphotyrosine binding;regulation of sequence-specific DNA binding transcription factor activity;response to exogenous dsRNA;pseudopodium;cell cycle;response to DNA…	biological_process;biological_process;cellular_component;molecular_function;molecular_function;biological_process;biological_process;biological_process;biological_process;molecular_function;biological_process;biological_process;cellular_component;biological_process;biological_process	ko04320;ko04150;ko05010;ko04114;ko05140;ko04370;ko05220;ko04012;ko04510;ko05221;ko05214;ko04010;ko04621;ko04666;ko04664;ko04360;ko04730;ko04520;ko04620;ko04270;ko05142;ko05131;ko05020;ko05213;ko04910;ko04914;ko04912;ko05223;ko05211;ko04720;ko04722;ko05215;ko05210;ko05219;ko04810;ko04662;ko04062;ko05218;ko04350;ko04013;ko05212;ko04650;ko04960;ko04540;ko05200;ko04660;ko05216;ko04930;ko04916	Dorso-ventral axis formation;mTOR signaling pathway;Alzheimer's disease;Oocyte meiosis;Leishmaniasis;VEGF signaling pathway;Chronic myeloid leukemia;ErbB signaling pathway;Focal adhesion;Acute myeloid leukemia;Glioma;MAPK signaling pathway;NOD-like receptor signaling pathway;Fc gamma R-mediated phagocytosis;Fc epsilon RI signaling pathway;Axon guidance;Long-term depression;Adherens junction;Toll-…	Organismal Systems;Environmental Information Processing;Human Diseases;Cellular Processes;Human Diseases;Environmental Information Processing;Human Diseases;Environmental Information Processing;Cellular Processes;Human Diseases;Human Diseases;Environmental Information Processing;Organismal Systems;Organismal Systems;Organismal Systems;Organismal Systems;Organismal Systems;Cellular Processes;Organ…
ENSONIG00000013469 : ENSONIG00000013469 : ENSONIP00000016938.2	ENSONIG00000013469	1.02216	no	up	0.240502	no	ENSONIP00000016938.2	0.76108	yes	down	0.00183179	yes	GO:0006370;GO:0005634;GO:0003676;GO:0004483	mRNA capping;nucleus;nucleic acid binding;mRNA (nucleoside-2'-O-)-methyltransferase activity	biological_process;cellular_component;molecular_function;molecular_function	.	.	.
ENSONIG00000019410 : ENSONIG00000019410 : ENSONIP00000024431.2	ENSONIG00000019410	0.789966	no	down	0.0368025	yes	ENSONIP00000024431.2	0.867995	no	down	0.00349374	yes	GO:0005739;GO:0047631	mitochondrion;ADP-ribose diphosphatase activity	cellular_component;molecular_function	ko00230	Purine metabolism	Metabolism
ENSONIG00000004610 : ENSONIG00000004610 : ENSONIP00000005802.1	ENSONIG00000004610	1.09252	no	up	0.0102879	yes	ENSONIP00000005802.1	1.03012	no	up	0.830469	no	GO:0006869;GO:0008289	lipid transport;lipid binding	biological_process;molecular_function	.	.	.
ENSONIG00000019601 : ENSONIG00000019601 : ENSONIP00000024678.2	ENSONIG00000019601	0.317883	yes	down	1.07253e-25	yes	ENSONIP00000024678.2	0.919386	no	down	0.389084	no	GO:0005764;GO:0004197;GO:0006508	lysosome;cysteine-type endopeptidase activity;proteolysis	cellular_component;molecular_function;biological_process	ko04142;ko04612	Lysosome;Antigen processing and presentation	Cellular Processes;Organismal Systems
ENSONIG00000005934 : ENSONIG00000005934 : ENSONIP00000007470.1	ENSONIG00000005934	1.07935	no	up	0.0594688	no	ENSONIP00000007470.1	0.944588	no	down	0.0619756	no	GO:0006412;GO:0003735;GO:0005840;GO:0051726	translation;structural constituent of ribosome;ribosome;regulation of cell cycle	biological_process;molecular_function;cellular_component;biological_process	ko03010	Ribosome	Genetic Information Processing
ENSONIG00000012216 : ENSONIG00000012216 : ENSONIP00000015386.1	ENSONIG00000012216	0.90533	no	down	0.775691	no	ENSONIP00000015386.1	0.943959	no	down	0.119468	no	GO:0005634;GO:0005737	nucleus;cytoplasm	cellular_component;cellular_component	.	.	.
ENSONIG00000017841 : ENSONIG00000017841 : ENSONIP00000022491.2	ENSONIG00000017841	0.964568	no	down	0.807127	no	ENSONIP00000022491.2	0.925225	no	down	0.248569	no	GO:0046872;GO:0006508;GO:0004177	metal ion binding;proteolysis;aminopeptidase activity	molecular_function;biological_process;molecular_function	.	.	.
ENSONIG00000015644 : ENSONIG00000015644 : ENSONIP00000066402.1	ENSONIG00000015644	1.52213	no	up	0.000590976	yes	ENSONIP00000066402.1	1.21031	yes	up	0.0187766	yes	GO:0070208;GO:0043234;GO:0007411;GO:0005589;GO:0048407;GO:0007155	protein heterotrimerization;protein complex;axon guidance;collagen type VI;platelet-derived growth factor binding;cell adhesion	biological_process;cellular_component;biological_process;cellular_component;molecular_function;biological_process	ko04512;ko04510	ECM-receptor interaction;Focal adhesion	Environmental Information Processing;Cellular Processes
ENSONIG00000012968 : ENSONIG00000012968 : ENSONIP00000071624.1	ENSONIG00000012968	1.88379	no	up	8.68227e-09	yes	ENSONIP00000071624.1	0.866563	no	down	0.437603	no	GO:0019717;GO:0000287;GO:0004634;GO:0000015;GO:0006094;GO:0042803;GO:0005625;GO:0046982;GO:0006096;GO:0014070;GO:0042493;GO:0005886;GO:0032355	synaptosome;magnesium ion binding;phosphopyruvate hydratase activity;phosphopyruvate hydratase complex;gluconeogenesis;protein homodimerization activity;soluble fraction;protein heterodimerization activity;glycolysis;response to organic cyclic compound;response to drug;plasma membrane;response to estradiol stimulus	cellular_component;molecular_function;molecular_function;cellular_component;biological_process;molecular_function;cellular_component;molecular_function;biological_process;biological_process;biological_process;cellular_component;biological_process	ko03018;ko00010	RNA degradation;Glycolysis / Gluconeogenesis	Genetic Information Processing;Metabolism
ENSONIG00000015518 : ENSONIG00000015518 : ENSONIP00000019526.2	ENSONIG00000015518	0.92032	no	down	0.658101	no	ENSONIP00000019526.2	0.833996	no	down	0.370794	no	GO:0005576	extracellular region	cellular_component	.	.	.
ENSONIG00000014753 : ENSONIG00000014753 : ENSONIP00000074532.1	ENSONIG00000014753	0.748926	no	down	0.00901277	yes	ENSONIP00000074532.1	0.901458	no	down	0.10107	no	GO:0004843;GO:0005634;GO:0005515;GO:0016579;GO:0006511;GO:0005737;GO:0004221;GO:0004197	ubiquitin-specific protease activity;nucleus;protein binding;protein deubiquitination;ubiquitin-dependent protein catabolic process;cytoplasm;ubiquitin thiolesterase activity;cysteine-type endopeptidase activity	molecular_function;cellular_component;molecular_function;biological_process;biological_process;cellular_component;molecular_function;molecular_function	.	.	.
ENSONIG00000010782 : ENSONIG00000010782 : ENSONIP00000013555.1	ENSONIG00000010782	1.09766	no	up	0.0129894	yes	ENSONIP00000013555.1	0.945832	no	down	0.46226	no	GO:0005829;GO:0003723;GO:0005515;GO:0006397;GO:0005634;GO:0071044;GO:0030529;GO:0000375;GO:0043928	cytosol;RNA binding;protein binding;mRNA processing;nucleus;histone mRNA catabolic process;ribonucleoprotein complex;RNA splicing, via transesterification reactions;exonucleolytic nuclear-transcribed mRNA catabolic process involved in deadenylation-dependent decay	cellular_component;molecular_function;molecular_function;biological_process;cellular_component;biological_process;cellular_component;biological_process;biological_process	.	.	.
ENSONIG00000008163 : ENSONIG00000008163 : ENSONIP00000031418.1	ENSONIG00000008163	1.21291	no	up	1.21793e-05	yes	ENSONIP00000031418.1	0.880878	no	down	0.0430028	yes	GO:0005634;GO:0004872;GO:0005886;GO:0006412;GO:0003735;GO:0015935	nucleus;receptor activity;plasma membrane;translation;structural constituent of ribosome;small ribosomal subunit	cellular_component;molecular_function;cellular_component;biological_process;molecular_function;cellular_component	ko03010	Ribosome	Genetic Information Processing
ENSONIG00000016244 : ENSONIG00000016244 : ENSONIP00000020451.1	ENSONIG00000016244	1.07435	no	up	0.0737952	no	ENSONIP00000020451.1	0.963036	no	down	0.250874	no	.	.	.	.	.	.
ENSONIG00000014648 : ENSONIG00000014648 : ENSONIP00000065319.1	ENSONIG00000014648	1	no	down	1	no	ENSONIP00000065319.1	1.08696	no	up	0.557527	no	GO:0030659;GO:0008565;GO:0006897;GO:0030117;GO:0005905;GO:0006886;GO:0005794	cytoplasmic vesicle membrane;protein transporter activity;endocytosis;membrane coat;coated pit;intracellular protein transport;Golgi apparatus	cellular_component;molecular_function;biological_process;cellular_component;cellular_component;biological_process;cellular_component	ko04142	Lysosome	Cellular Processes
ENSONIG00000003429 : ENSONIG00000003429 : ENSONIP00000074261.1	ENSONIG00000003429	0.950171	no	down	0.995644	no	ENSONIP00000074261.1	1.04221	no	up	0.745599	no	GO:0006260;GO:0006351;GO:0016568;GO:0006355;GO:0035098	DNA replication;transcription, DNA-dependent;chromatin modification;regulation of transcription, DNA-dependent;ESC/E(Z) complex	biological_process;biological_process;biological_process;biological_process;cellular_component	.	.	.
ENSONIG00000006378 : ENSONIG00000006378 : ENSONIP00000058694.1	ENSONIG00000006378	0.695129	no	down	0.417722	no	ENSONIP00000058694.1	0.935806	no	down	0.523293	no	GO:0008270;GO:0004089;GO:0042539;GO:0006730	zinc ion binding;carbonate dehydratase activity;hypotonic salinity response;one-carbon metabolic process	molecular_function;molecular_function;biological_process;biological_process	ko00910	Nitrogen metabolism	Metabolism
ENSONIG00000019242 : ENSONIG00000019242 : ENSONIP00000049906.1	ENSONIG00000019242	0.804343	no	down	0.245174	no	ENSONIP00000049906.1	0.739635	yes	down	0.0131175	yes	GO:0048821;GO:0031410;GO:0015094;GO:0015078;GO:0015295;GO:0005770;GO:0009986;GO:0007611;GO:0005769;GO:0005384;GO:0010039;GO:0048813;GO:0070826;GO:0005887;GO:0015087;GO:0015086;GO:0070627;GO:0055037;GO:0005764;GO:0016324;GO:0005634;GO:0015093;GO:0005886;GO:0012505;GO:0005903;GO:0001666;GO:0045178;GO:0005802;GO:0005515;GO:0006919;GO:0005375;GO:0015100;GO:0005385;GO:0031902;GO:0060586;GO:0048471;GO:…	erythrocyte development;cytoplasmic vesicle;lead ion transmembrane transporter activity;hydrogen ion transmembrane transporter activity;solute:hydrogen symporter activity;late endosome;cell surface;learning or memory;early endosome;manganese ion transmembrane transporter activity;response to iron ion;dendrite morphogenesis;paraferritin complex;integral to plasma membrane;cobalt ion transmembrane …	biological_process;cellular_component;molecular_function;molecular_function;molecular_function;cellular_component;cellular_component;biological_process;cellular_component;molecular_function;biological_process;biological_process;cellular_component;cellular_component;molecular_function;molecular_function;biological_process;cellular_component;cellular_component;cellular_component;cellular_component;…	ko04142	Lysosome	Cellular Processes
ENSONIG00000013499 : ENSONIG00000013499 : ENSONIP00000045567.1	ENSONIG00000013499	0.459515	yes	down	5.74583e-19	yes	ENSONIP00000045567.1	0.777251	yes	down	9.73638e-05	yes	GO:0043169;GO:0060356;GO:0015175;GO:0003824;GO:0005975;GO:0016021;GO:0016324;GO:0015827;GO:0042470	cation binding;leucine import;neutral amino acid transmembrane transporter activity;catalytic activity;carbohydrate metabolic process;integral to membrane;apical plasma membrane;tryptophan transport;melanosome	molecular_function;biological_process;molecular_function;molecular_function;biological_process;cellular_component;cellular_component;biological_process;cellular_component	.	.	.
ENSONIG00000017988 : ENSONIG00000017988 : ENSONIP00000033771.1	ENSONIG00000017988	1.0331	no	up	0.140447	no	ENSONIP00000033771.1	0.880878	no	down	0.184984	no	.	.	.	.	.	.
ENSONIG00000009560 : ENSONIG00000009560 : ENSONIP00000067438.1	ENSONIG00000009560	0.730885	no	down	1.00743e-05	yes	ENSONIP00000067438.1	1.03459	no	up	0.548471	no	GO:0008270;GO:0005737;GO:0005509	zinc ion binding;cytoplasm;calcium ion binding	molecular_function;cellular_component;molecular_function	ko05414;ko05412;ko05416;ko05410	Dilated cardiomyopathy;Arrhythmogenic right ventricular cardiomyopathy (ARVC;Viral myocarditis;Hypertrophic cardiomyopathy (HCM	Human Diseases;Human Diseases;Human Diseases;Human Diseases
ENSONIG00000001592 : ENSONIG00000001592 : ENSONIP00000065701.1	ENSONIG00000001592	0.946373	no	down	0.950804	no	ENSONIP00000065701.1	0.995012	no	down	0.404895	no	GO:0005852;GO:0003743;GO:0000166	eukaryotic translation initiation factor 3 complex;translation initiation factor activity;nucleotide binding	cellular_component;molecular_function;molecular_function	.	.	.
ENSONIG00000019548 : ENSONIG00000019548 : ENSONIP00000028716.1	ENSONIG00000019548	1.08628	no	up	0.0605195	no	ENSONIP00000028716.1	0.957259	no	down	0.341959	no	GO:0045739;GO:0006302;GO:0010212;GO:0070531;GO:0031572;GO:0031593;GO:0006915;GO:0070552;GO:0005737;GO:0016568	positive regulation of DNA repair;double-strand break repair;response to ionizing radiation;BRCA1-A complex;G2/M transition DNA damage checkpoint;polyubiquitin binding;apoptosis;BRISC complex;cytoplasm;chromatin modification	biological_process;biological_process;biological_process;cellular_component;biological_process;molecular_function;biological_process;cellular_component;cellular_component;biological_process	.	.	.
ENSONIG00000018698 : ENSONIG00000018698 : ENSONIP00000028279.1	ENSONIG00000018698	1.00043	no	up	0.70404	no	ENSONIP00000028279.1	0.955034	no	down	0.450235	no	GO:0030686;GO:0006364;GO:0006412;GO:0003735;GO:0022627;GO:0032040;GO:0042274	90S preribosome;rRNA processing;translation;structural constituent of ribosome;cytosolic small ribosomal subunit;small-subunit processome;ribosomal small subunit biogenesis	cellular_component;biological_process;biological_process;molecular_function;cellular_component;cellular_component;biological_process	ko03010	Ribosome	Genetic Information Processing
ENSONIG00000015906 : ENSONIG00000015906 : ENSONIP00000020036.2	ENSONIG00000015906	1.1177	no	up	0.00347255	yes	ENSONIP00000020036.2	1.03701	no	up	0.710043	no	GO:0010165;GO:0005624;GO:0017124;GO:0030492;GO:0042493;GO:0016324;GO:0032526;GO:0016197;GO:0004872;GO:0020028;GO:0005509;GO:0033280;GO:0005768;GO:0045056;GO:0031526;GO:0005905;GO:0046879;GO:0005615;GO:0007568;GO:0015031;GO:0010951;GO:0042953;GO:0006898;GO:0016021;GO:0031100	response to X-ray;membrane fraction;SH3 domain binding;hemoglobin binding;response to drug;apical plasma membrane;response to retinoic acid;endosome transport;receptor activity;hemoglobin import;calcium ion binding;response to vitamin D;endosome;transcytosis;brush border membrane;coated pit;hormone secretion;extracellular space;aging;protein transport;negative regulation of endopeptidase activity…	biological_process;cellular_component;molecular_function;molecular_function;biological_process;cellular_component;biological_process;biological_process;molecular_function;biological_process;molecular_function;biological_process;cellular_component;biological_process;cellular_component;cellular_component;biological_process;cellular_component;biological_process;biological_process;biological_process;…	ko04340	Hedgehog signaling pathway	Environmental Information Processing
ENSONIG00000004737 : ENSONIG00000004737 : ENSONIP00000030762.1	ENSONIG00000004737	1.70585	no	up	1	no	ENSONIP00000030762.1	0.923077	no	down	0.59495	no	GO:0005509;GO:0016021;GO:0007275;GO:0005886;GO:0007156	calcium ion binding;integral to membrane;multicellular organismal development;plasma membrane;homophilic cell adhesion	molecular_function;cellular_component;biological_process;cellular_component;biological_process	.	.	.
ENSONIG00000015885 : ENSONIG00000015885 : ENSONIP00000020007.2	ENSONIG00000015885	3.95875	yes	up	1.10313e-24	yes	ENSONIP00000020007.2	0.944895	no	down	0.048354	yes	GO:0005096;GO:0007165;GO:0005622	GTPase activator activity;signal transduction;intracellular	molecular_function;biological_process;cellular_component	ko04670;ko04510;ko04144;ko04810	Leukocyte transendothelial migration;Focal adhesion;Endocytosis;Regulation of actin cytoskeleton	Organismal Systems;Cellular Processes;Cellular Processes;Cellular Processes
ENSONIG00000001409 : ENSONIG00000001409 : ENSONIP00000001776.2	ENSONIG00000001409	0.861297	no	down	0.306092	no	ENSONIP00000001776.2	0.935161	no	down	0.410648	no	GO:0005509;GO:0008026;GO:0007067;GO:0051301;GO:0005524;GO:0003676	calcium ion binding;ATP-dependent helicase activity;mitosis;cell division;ATP binding;nucleic acid binding	molecular_function;molecular_function;biological_process;biological_process;molecular_function;molecular_function	ko03420	Nucleotide excision repair	Genetic Information Processing
ENSONIG00000014683 : ENSONIG00000014683 : ENSONIP00000018483.2	ENSONIG00000014683	0.660554	no	down	0.00370791	yes	ENSONIP00000018483.2	0.902029	no	down	0.0366951	yes	GO:0006906;GO:0031901;GO:0005624;GO:0016189;GO:0042803;GO:0045022;GO:0008270;GO:0005516;GO:0005829;GO:0005545;GO:0019897;GO:0030742	vesicle fusion;early endosome membrane;membrane fraction;synaptic vesicle to endosome fusion;protein homodimerization activity;early endosome to late endosome transport;zinc ion binding;calmodulin binding;cytosol;1-phosphatidylinositol binding;extrinsic to plasma membrane;GTP-dependent protein binding	biological_process;cellular_component;cellular_component;biological_process;molecular_function;biological_process;molecular_function;molecular_function;cellular_component;molecular_function;cellular_component;molecular_function	ko04144;ko04145	Endocytosis;Phagosome	Cellular Processes;Cellular Processes
ENSONIG00000020111 : ENSONIG00000020111 : ENSONIP00000025334.2	ENSONIG00000020111	1.28874	no	up	5.82026e-06	yes	ENSONIP00000025334.2	0.989062	no	down	0.695156	no	GO:0006508;GO:0006915;GO:0004252;GO:0031966;GO:0005758	proteolysis;apoptosis;serine-type endopeptidase activity;mitochondrial membrane;mitochondrial intermembrane space	biological_process;biological_process;molecular_function;cellular_component;cellular_component	ko05012	Parkinson's disease	Human Diseases
ENSONIG00000003029 : ENSONIG00000003029 : ENSONIP00000003793.2	ENSONIG00000003029	1.01294	no	up	0.322166	no	ENSONIP00000003793.2	0.85732	no	down	0.0163476	yes	GO:0006904;GO:0015031	vesicle docking involved in exocytosis;protein transport	biological_process;biological_process	.	.	.
ENSONIG00000007590 : ENSONIG00000007590 : ENSONIP00000009569.2	ENSONIG00000007590	1.44836	no	up	4.13544e-14	yes	ENSONIP00000009569.2	0.555613	yes	down	0.335023	no	GO:0035556;GO:0005874	intracellular signal transduction;microtubule	biological_process;cellular_component	ko04010	MAPK signaling pathway	Environmental Information Processing
ENSONIG00000009515 : ENSONIG00000009515 : ENSONIP00000011953.2	ENSONIG00000009515	1.6409	no	up	3.22895e-25	yes	ENSONIP00000011953.2	0.995675	no	down	0.929486	no	GO:0003677;GO:0005634;GO:0005811;GO:0000786;GO:0006334	DNA binding;nucleus;lipid particle;nucleosome;nucleosome assembly	molecular_function;cellular_component;cellular_component;cellular_component;biological_process	ko05322	Systemic lupus erythematosus	Human Diseases
ENSONIG00000008087 : ENSONIG00000008087 : ENSONIP00000010188.2	ENSONIG00000008087	2.60232	yes	up	1.8071e-05	yes	ENSONIP00000010188.2	1.04221	no	up	0.57405	no	GO:0005198;GO:0007155	structural molecule activity;cell adhesion	molecular_function;biological_process	.	.	.
ENSONIG00000015796 : ENSONIG00000015796 : ENSONIP00000019885.2	ENSONIG00000015796	0.396472	yes	down	1	no	ENSONIP00000019885.2	1.0957	no	up	0.0454355	yes	GO:0090022;GO:0016021;GO:0007596;GO:0044291;GO:0005178;GO:0001525;GO:0030057;GO:0005615	regulation of neutrophil chemotaxis;integral to membrane;blood coagulation;cell-cell contact zone;integrin binding;angiogenesis;desmosome;extracellular space	biological_process;cellular_component;biological_process;cellular_component;molecular_function;biological_process;cellular_component;cellular_component	ko04514;ko04670;ko05120;ko04530	Cell adhesion molecules (CAMs;Leukocyte transendothelial migration;Epithelial cell signaling in Helicobacter pylori infection;Tight junction	Environmental Information Processing;Organismal Systems;Human Diseases;Cellular Processes
ENSONIG00000013884 : ENSONIG00000013884 : ENSONIP00000017455.1	ENSONIG00000013884	1.07255	no	up	0.0354236	yes	ENSONIP00000017455.1	1.19262	no	up	0.00794356	yes	GO:0001822;GO:0016021;GO:0005923;GO:0005912;GO:0004872;GO:0016323;GO:0007155	kidney development;integral to membrane;tight junction;adherens junction;receptor activity;basolateral plasma membrane;cell adhesion	biological_process;cellular_component;cellular_component;cellular_component;molecular_function;cellular_component;biological_process	ko05416	Viral myocarditis	Human Diseases
ENSONIG00000009492 : ENSONIG00000009492 : ENSONIP00000080308.1	ENSONIG00000009492	0.909329	no	down	0.540808	no	ENSONIP00000080308.1	1.00769	no	up	0.836358	no	GO:0016627;GO:0016021;GO:0006461;GO:0006784;GO:0031966	oxidoreductase activity, acting on the CH-CH group of donors;integral to membrane;protein complex assembly;heme a biosynthetic process;mitochondrial membrane	molecular_function;cellular_component;biological_process;biological_process;cellular_component	ko00860;ko00190;ko02020	Porphyrin and chlorophyll metabolism;Oxidative phosphorylation;Two-component system	Metabolism;Metabolism;Environmental Information Processing
ENSONIG00000001283 : ENSONIG00000001283 : ENSONIP00000001620.2	ENSONIG00000001283	0.705077	no	down	9.22367e-07	yes	ENSONIP00000001620.2	1.00803	no	up	0.832387	no	GO:0043022;GO:0006446;GO:0003743;GO:0005634;GO:0005852	ribosome binding;regulation of translational initiation;translation initiation factor activity;nucleus;eukaryotic translation initiation factor 3 complex	molecular_function;biological_process;molecular_function;cellular_component;cellular_component	.	.	.
ENSONIG00000005744 : ENSONIG00000005744 : ENSONIP00000069972.1	ENSONIG00000005744	0.931887	no	down	0.787329	no	ENSONIP00000069972.1	1.05409	no	up	0.428557	no	GO:0045732;GO:0005624;GO:0031901;GO:0007154;GO:0035091;GO:0008565;GO:0005515;GO:0005794;GO:0005829	positive regulation of protein catabolic process;membrane fraction;early endosome membrane;cell communication;phosphatidylinositol binding;protein transporter activity;protein binding;Golgi apparatus;cytosol	biological_process;cellular_component;cellular_component;biological_process;molecular_function;molecular_function;molecular_function;cellular_component;cellular_component	.	.	.
ENSONIG00000009651 : ENSONIG00000009651 : ENSONIP00000034679.1	ENSONIG00000009651	1.08033	no	up	0.372513	no	ENSONIP00000034679.1	0.96528	no	down	0.761495	no	GO:0046872;GO:0006166;GO:0006144;GO:0005829;GO:0016773;GO:0005524;GO:0004001	metal ion binding;purine ribonucleoside salvage;purine base metabolic process;cytosol;phosphotransferase activity, alcohol group as acceptor;ATP binding;adenosine kinase activity	molecular_function;biological_process;biological_process;cellular_component;molecular_function;molecular_function;molecular_function	ko00230	Purine metabolism	Metabolism
ENSONIG00000003716 : ENSONIG00000003716 : ENSONIP00000004673.2	ENSONIG00000003716	0.758264	no	down	0.142235	no	ENSONIP00000004673.2	0.916321	no	down	0.0399024	yes	GO:0030675;GO:0001726;GO:0007165;GO:0005737;GO:0017124;GO:0005886	Rac GTPase activator activity;ruffle;signal transduction;cytoplasm;SH3 domain binding;plasma membrane	molecular_function;cellular_component;biological_process;cellular_component;molecular_function;cellular_component	ko00750	Vitamin B6 metabolism	Metabolism
ENSONIG00000016113 : ENSONIG00000016113 : ENSONIP00000020296.1	ENSONIG00000016113	0.937144	no	down	0.822484	no	ENSONIP00000020296.1	0.918478	no	down	0.0636479	no	GO:0005099;GO:0050796;GO:0019903;GO:0005737;GO:0005095;GO:0005634;GO:0030496;GO:0005886;GO:0005884;GO:0007264;GO:0006112;GO:0005516	Ras GTPase activator activity;regulation of insulin secretion;protein phosphatase binding;cytoplasm;GTPase inhibitor activity;nucleus;midbody;plasma membrane;actin filament;small GTPase mediated signal transduction;energy reserve metabolic process;calmodulin binding	molecular_function;biological_process;molecular_function;cellular_component;molecular_function;cellular_component;cellular_component;cellular_component;cellular_component;biological_process;biological_process;molecular_function	ko04810	Regulation of actin cytoskeleton	Cellular Processes
ENSONIG00000013974 : ENSONIG00000013974 : ENSONIP00000017564.2	ENSONIG00000013974	1.38339	no	up	0.044496	yes	ENSONIP00000017564.2	1.03217	no	up	0.422208	no	GO:0031124;GO:0006369;GO:0006376;GO:0006406;GO:0003723;GO:0048025;GO:0000166;GO:0005654	mRNA 3'-end processing;termination of RNA polymerase II transcription;mRNA splice site selection;mRNA export from nucleus;RNA binding;negative regulation of nuclear mRNA splicing, via spliceosome;nucleotide binding;nucleoplasm	biological_process;biological_process;biological_process;biological_process;molecular_function;biological_process;molecular_function;cellular_component	.	.	.
ENSONIG00000014767 : ENSONIG00000014767 : ENSONIP00000072285.1	ENSONIG00000014767	1.50557	no	up	0.00380529	yes	ENSONIP00000072285.1	0.959177	no	down	0.0783253	no	GO:0005515;GO:0055056;GO:0033300;GO:0042470;GO:0016323;GO:0001939;GO:0042149;GO:0016021	protein binding;D-glucose transmembrane transporter activity;dehydroascorbic acid transporter activity;melanosome;basolateral plasma membrane;female pronucleus;cellular response to glucose starvation;integral to membrane	molecular_function;molecular_function;molecular_function;cellular_component;cellular_component;cellular_component;biological_process;cellular_component	ko05211;ko04920;ko05200	Renal cell carcinoma;Adipocytokine signaling pathway;Pathways in cancer	Human Diseases;Organismal Systems;Human Diseases
ENSONIG00000020303 : ENSONIG00000020303 : ENSONIP00000025581.1	ENSONIG00000020303	0.861463	no	down	0.0577125	no	ENSONIP00000025581.1	0.977265	no	down	0.528569	no	.	.	.	.	.	.
ENSONIG00000000899 : ENSONIG00000000899 : ENSONIP00000001137.2	ENSONIG00000000899	1.40546	no	up	0.000367352	yes	ENSONIP00000001137.2	1.02429	no	up	0.609909	no	GO:0006397;GO:0005634;GO:0003729;GO:0051148;GO:0008380;GO:0000166;GO:0000381;GO:0048025	mRNA processing;nucleus;mRNA binding;negative regulation of muscle cell differentiation;RNA splicing;nucleotide binding;regulation of alternative nuclear mRNA splicing, via spliceosome;negative regulation of nuclear mRNA splicing, via spliceosome	biological_process;cellular_component;molecular_function;biological_process;biological_process;molecular_function;biological_process;biological_process	.	.	.
ENSONIG00000018479 : ENSONIG00000018479 : ENSONIP00000070719.1	ENSONIG00000018479	0.765608	no	down	0.00040002	yes	ENSONIP00000070719.1	0.848429	no	down	0.0454692	yes	GO:0017160;GO:0043492;GO:0006935;GO:0030675;GO:0016020;GO:0043089;GO:0048365;GO:0005829;GO:0007264;GO:0006810	Ral GTPase binding;ATPase activity, coupled to movement of substances;chemotaxis;Rac GTPase activator activity;membrane;positive regulation of Cdc42 GTPase activity;Rac GTPase binding;cytosol;small GTPase mediated signal transduction;transport	molecular_function;molecular_function;biological_process;molecular_function;cellular_component;biological_process;molecular_function;cellular_component;biological_process;biological_process	ko05200;ko05212	Pathways in cancer;Pancreatic cancer	Human Diseases;Human Diseases
ENSONIG00000010413 : ENSONIG00000010413 : ENSONIP00000065744.1	ENSONIG00000010413	0.655593	no	down	4.31915e-06	yes	ENSONIP00000065744.1	0.748761	yes	down	0.00352022	yes	GO:0006683;GO:0043169;GO:0004336;GO:0005764;GO:0005975	galactosylceramide catabolic process;cation binding;galactosylceramidase activity;lysosome;carbohydrate metabolic process	biological_process;molecular_function;molecular_function;cellular_component;biological_process	ko00600;ko04142	Sphingolipid metabolism;Lysosome	Metabolism;Cellular Processes
ENSONIG00000009211 : ENSONIG00000009211 : ENSONIP00000066783.1	ENSONIG00000009211	0.962086	no	down	0.914084	no	ENSONIP00000066783.1	0.928962	no	down	0.0324739	yes	GO:0005634;GO:0034364;GO:0005886;GO:0005737;GO:0006869;GO:0008289;GO:0008203;GO:0003723	nucleus;high-density lipoprotein particle;plasma membrane;cytoplasm;lipid transport;lipid binding;cholesterol metabolic process;RNA binding	cellular_component;cellular_component;cellular_component;cellular_component;biological_process;molecular_function;biological_process;molecular_function	.	.	.
ENSONIG00000006655 : ENSONIG00000006655 : ENSONIP00000046678.1	ENSONIG00000006655	0.81155	no	down	0.053266	no	ENSONIP00000046678.1	0.833181	yes	down	0.0835707	no	GO:0006869;GO:0008289	lipid transport;lipid binding	biological_process;molecular_function	.	.	.
ENSONIG00000012771 : ENSONIG00000012771 : ENSONIP00000016077.1	ENSONIG00000012771	1.16374	no	up	0.0239808	yes	ENSONIP00000016077.1	1.08806	no	up	0.123011	no	GO:0016021	integral to membrane	cellular_component	.	.	.
ENSONIG00000014028 : ENSONIG00000014028 : ENSONIP00000017635.2	ENSONIG00000014028	0.947323	no	down	0.970143	no	ENSONIP00000017635.2	0.92032	no	down	0.0640692	no	GO:0004674;GO:0005524;GO:0005634;GO:0019208;GO:0030500	protein serine/threonine kinase activity;ATP binding;nucleus;phosphatase regulator activity;regulation of bone mineralization	molecular_function;molecular_function;cellular_component;molecular_function;biological_process	.	.	.
ENSONIG00000003806 : ENSONIG00000003806 : ENSONIP00000037732.1	ENSONIG00000003806	0.914804	no	down	0.552001	no	ENSONIP00000037732.1	0.916613	no	down	0.290717	no	GO:0031775;GO:0033017;GO:0043434;GO:0005524;GO:0006937;GO:0016021;GO:0005509;GO:0006754;GO:0043234;GO:0005515;GO:0005388	lutropin-choriogonadotropic hormone receptor binding;sarcoplasmic reticulum membrane;response to peptide hormone stimulus;ATP binding;regulation of muscle contraction;integral to membrane;calcium ion binding;ATP biosynthetic process;protein complex;protein binding;calcium-transporting ATPase activity	molecular_function;cellular_component;biological_process;molecular_function;biological_process;cellular_component;molecular_function;biological_process;cellular_component;molecular_function;molecular_function	ko04020;ko05010	Calcium signaling pathway;Alzheimer's disease	Environmental Information Processing;Human Diseases
ENSONIG00000014149 : ENSONIG00000014149 : ENSONIP00000017788.1	ENSONIG00000014149	1.22118	no	up	1	no	ENSONIP00000017788.1	0.805296	yes	down	0.0657022	no	GO:0045410;GO:0071727;GO:0042495;GO:0046982;GO:0004888;GO:0006954;GO:0042535;GO:0030670;GO:0035354;GO:0005887;GO:0045087	positive regulation of interleukin-6 biosynthetic process;cellular response to triacyl bacterial lipopeptide;detection of triacyl bacterial lipopeptide;protein heterodimerization activity;transmembrane signaling receptor activity;inflammatory response;positive regulation of tumor necrosis factor biosynthetic process;phagocytic vesicle membrane;Toll-like receptor 1-Toll-like receptor 2 protein com…	biological_process;biological_process;biological_process;molecular_function;molecular_function;biological_process;biological_process;cellular_component;cellular_component;cellular_component;biological_process	ko04620	Toll-like receptor signaling pathway	Organismal Systems
ENSONIG00000017048 : ENSONIG00000017048 : ENSONIP00000039690.1	ENSONIG00000017048	0.919516	no	down	0.520589	no	ENSONIP00000039690.1	0.917252	no	down	0.336945	no	GO:0005515;GO:0000354;GO:0003676;GO:0005682;GO:0005654;GO:0005524;GO:0004004;GO:0071013	protein binding;cis assembly of pre-catalytic spliceosome;nucleic acid binding;U5 snRNP;nucleoplasm;ATP binding;ATP-dependent RNA helicase activity;catalytic step 2 spliceosome	molecular_function;biological_process;molecular_function;cellular_component;cellular_component;molecular_function;molecular_function;cellular_component	.	.	.
ENSONIG00000001407 : ENSONIG00000001407 : ENSONIP00000001774.1	ENSONIG00000001407	0.934901	no	down	0.810684	no	ENSONIP00000001774.1	0.943329	no	down	0.0429838	yes	GO:0005759;GO:0070402;GO:0051289;GO:0016651;GO:0005886;GO:0008670;GO:0005634;GO:0006635	mitochondrial matrix;NADPH binding;protein homotetramerization;oxidoreductase activity, acting on NADH or NADPH;plasma membrane;2,4-dienoyl-CoA reductase (NADPH) activity;nucleus;fatty acid beta-oxidation	cellular_component;molecular_function;biological_process;molecular_function;cellular_component;molecular_function;cellular_component;biological_process	.	.	.
ENSONIG00000014930 : ENSONIG00000014930 : ENSONIP00000027936.1	ENSONIG00000014930	1.33098	no	up	0.324552	no	ENSONIP00000027936.1	0.934558	no	down	0.393572	no	GO:0005524;GO:0006096;GO:0005945;GO:0046872;GO:0003872	ATP binding;glycolysis;6-phosphofructokinase complex;metal ion binding;6-phosphofructokinase activity	molecular_function;biological_process;cellular_component;molecular_function;molecular_function	ko00051;ko00010;ko00052;ko00030	Fructose and mannose metabolism;Glycolysis / Gluconeogenesis;Galactose metabolism;Pentose phosphate pathway	Metabolism;Metabolism;Metabolism;Metabolism
ENSONIG00000019438 : ENSONIG00000019438 : ENSONIP00000024469.1	ENSONIG00000019438	1.08718	no	up	0.0165372	yes	ENSONIP00000024469.1	0.911727	no	down	0.0238896	yes	GO:0005840;GO:0003735;GO:0006414;GO:0005634;GO:0042254	ribosome;structural constituent of ribosome;translational elongation;nucleus;ribosome biogenesis	cellular_component;molecular_function;biological_process;cellular_component;biological_process	ko03010	Ribosome	Genetic Information Processing
ENSONIG00000014954 : ENSONIG00000014954 : ENSONIP00000018825.2	ENSONIG00000014954	0.986021	no	down	0.467901	no	ENSONIP00000018825.2	1.14823	no	up	0.161488	no	GO:0006364;GO:0042274;GO:0030515;GO:0005730	rRNA processing;ribosomal small subunit biogenesis;snoRNA binding;nucleolus	biological_process;biological_process;molecular_function;cellular_component	ko00310	Lysine degradation	Metabolism
ENSONIG00000012627 : ENSONIG00000012627 : ENSONIP00000015892.2	ENSONIG00000012627	0.900243	no	down	0.43915	no	ENSONIP00000015892.2	0.968504	no	down	0.706766	no	GO:0008203;GO:0006869;GO:0016021;GO:0005905;GO:0034361;GO:0005509	cholesterol metabolic process;lipid transport;integral to membrane;coated pit;very-low-density lipoprotein particle;calcium ion binding	biological_process;biological_process;cellular_component;cellular_component;cellular_component;molecular_function	ko04340	Hedgehog signaling pathway	Environmental Information Processing
ENSONIG00000005534 : ENSONIG00000005534 : ENSONIP00000006956.2	ENSONIG00000005534	1.54474	no	up	0.0838799	no	ENSONIP00000006956.2	0.991039	no	down	0.89051	no	GO:0005874;GO:0035372;GO:0051010;GO:0007067;GO:0008017;GO:0031115;GO:0005815;GO:0045893;GO:0030496;GO:0030981;GO:0051301	microtubule;protein localization to microtubule;microtubule plus-end binding;mitosis;microtubule binding;negative regulation of microtubule polymerization;microtubule organizing center;positive regulation of transcription, DNA-dependent;midbody;cortical microtubule cytoskeleton;cell division	cellular_component;biological_process;molecular_function;biological_process;molecular_function;biological_process;cellular_component;biological_process;cellular_component;cellular_component;biological_process	.	.	.
ENSONIG00000005384 : ENSONIG00000005384 : ENSONIP00000006769.2	ENSONIG00000005384	1.32238	no	up	4.48198e-07	yes	ENSONIP00000006769.2	0.801502	yes	down	0.0737843	no	.	.	.	.	.	.
ENSONIG00000020048 : ENSONIG00000020048 : ENSONIP00000025252.1	ENSONIG00000020048	0.191405	yes	down	1.49738e-24	yes	ENSONIP00000025252.1	0.964637	no	down	0.448709	no	GO:0004298;GO:0005634;GO:0005839;GO:0051603;GO:0005737	threonine-type endopeptidase activity;nucleus;proteasome core complex;proteolysis involved in cellular protein catabolic process;cytoplasm	molecular_function;cellular_component;cellular_component;biological_process;cellular_component	ko03050	Proteasome	Genetic Information Processing
ENSONIG00000007243 : ENSONIG00000007243 : ENSONIP00000009164.2	ENSONIG00000007243	1.60962	no	up	2.32433e-08	yes	ENSONIP00000009164.2	1.01647	no	up	0.615906	no	GO:0005509;GO:0006508;GO:0004198;GO:0005886	calcium ion binding;proteolysis;calcium-dependent cysteine-type endopeptidase activity;plasma membrane	molecular_function;biological_process;molecular_function;cellular_component	ko04210;ko05010	Apoptosis;Alzheimer's disease	Cellular Processes;Human Diseases
ENSONIG00000016042 : ENSONIG00000016042 : ENSONIP00000020211.2	ENSONIG00000016042	0.794578	no	down	0.0243832	yes	ENSONIP00000020211.2	0.964309	no	down	0.677754	no	GO:0016197;GO:0015031;GO:0031902	endosome transport;protein transport;late endosome membrane	biological_process;biological_process;cellular_component	ko04144	Endocytosis	Cellular Processes
ENSONIG00000004889 : ENSONIG00000004889 : ENSONIP00000042426.1	ENSONIG00000004889	0.929663	no	down	0.902841	no	ENSONIP00000042426.1	0.941748	no	down	0.142438	no	GO:0044212;GO:0006355;GO:0006351;GO:0071480;GO:0005634;GO:0006975;GO:0005737	transcription regulatory region DNA binding;regulation of transcription, DNA-dependent;transcription, DNA-dependent;cellular response to gamma radiation;nucleus;DNA damage induced protein phosphorylation;cytoplasm	molecular_function;biological_process;biological_process;biological_process;cellular_component;biological_process;cellular_component	ko04120;ko04144	Ubiquitin mediated proteolysis;Endocytosis	Genetic Information Processing;Cellular Processes
ENSONIG00000013377 : ENSONIG00000013377 : ENSONIP00000039931.1	ENSONIG00000013377	1.03711	no	up	0.268206	no	ENSONIP00000039931.1	1.29621	yes	up	0.0304235	yes	GO:0005856;GO:0003779;GO:0008270;GO:0042383;GO:0005737	cytoskeleton;actin binding;zinc ion binding;sarcolemma;cytoplasm	cellular_component;molecular_function;molecular_function;cellular_component;cellular_component	ko05416;ko05410;ko05414;ko05412	Viral myocarditis;Hypertrophic cardiomyopathy (HCM;Dilated cardiomyopathy;Arrhythmogenic right ventricular cardiomyopathy (ARVC	Human Diseases;Human Diseases;Human Diseases;Human Diseases
ENSONIG00000000924 : ENSONIG00000000924 : ENSONIP00000001168.2	ENSONIG00000000924	1.39727	no	up	0.234288	no	ENSONIP00000001168.2	0.815981	yes	down	0.167625	no	.	.	.	.	.	.
ENSONIG00000004381 : ENSONIG00000004381 : ENSONIP00000005516.2	ENSONIG00000004381	0.811017	no	down	0.0448011	yes	ENSONIP00000005516.2	0.917839	no	down	0.0931897	no	GO:0004475;GO:0009058;GO:0005525	mannose-1-phosphate guanylyltransferase activity;biosynthetic process;GTP binding	molecular_function;biological_process;molecular_function	ko00051;ko00520	Fructose and mannose metabolism;Amino sugar and nucleotide sugar metabolism	Metabolism;Metabolism
ENSONIG00000013377 : ENSONIG00000013377 : ENSONIP00000081378.1	ENSONIG00000013377	1.03711	no	up	0.268206	no	ENSONIP00000081378.1	1.15983	no	up	0.0133237	yes	GO:0005856;GO:0003779;GO:0008270;GO:0042383;GO:0005737	cytoskeleton;actin binding;zinc ion binding;sarcolemma;cytoplasm	cellular_component;molecular_function;molecular_function;cellular_component;cellular_component	ko05416;ko05410;ko05414;ko05412	Viral myocarditis;Hypertrophic cardiomyopathy (HCM;Dilated cardiomyopathy;Arrhythmogenic right ventricular cardiomyopathy (ARVC	Human Diseases;Human Diseases;Human Diseases;Human Diseases
ENSONIG00000010846 : ENSONIG00000010846 : ENSONIP00000013641.2	ENSONIG00000010846	1.1591	no	up	0.0161857	yes	ENSONIP00000013641.2	0.958537	no	down	0.258651	no	GO:0005622;GO:0005097;GO:0005902;GO:0005085;GO:0030165	intracellular;Rab GTPase activator activity;microvillus;guanyl-nucleotide exchange factor activity;PDZ domain binding	cellular_component;molecular_function;cellular_component;molecular_function;molecular_function	.	.	.
ENSONIG00000019810 : ENSONIG00000019810 : ENSONIP00000078887.1	ENSONIG00000019810	1.07106	no	up	0.246082	no	ENSONIP00000078887.1	0.991703	no	down	0.831355	no	GO:0016773;GO:0005515;GO:0043967;GO:0003712;GO:0006355;GO:0030914;GO:0035267;GO:0000125;GO:0033276;GO:0006351;GO:0043968;GO:0016578	phosphotransferase activity, alcohol group as acceptor;protein binding;histone H4 acetylation;transcription cofactor activity;regulation of transcription, DNA-dependent;STAGA complex;NuA4 histone acetyltransferase complex;PCAF complex;transcription factor TFTC complex;transcription, DNA-dependent;histone H2A acetylation;histone deubiquitination	molecular_function;molecular_function;biological_process;molecular_function;biological_process;cellular_component;cellular_component;cellular_component;cellular_component;biological_process;biological_process;biological_process	.	.	.
ENSONIG00000012048 : ENSONIG00000012048 : ENSONIP00000076369.1	ENSONIG00000012048	1.12184	no	up	0.00112593	yes	ENSONIP00000076369.1	0.968504	no	down	0.625944	no	GO:0006334;GO:0005737;GO:0030332;GO:0060215;GO:0045944;GO:0005634;GO:0042393;GO:0007283;GO:0030154;GO:0051260;GO:0006351	nucleosome assembly;cytoplasm;cyclin binding;primitive hemopoiesis;positive regulation of transcription from RNA polymerase II promoter;nucleus;histone binding;spermatogenesis;cell differentiation;protein homooligomerization;transcription, DNA-dependent	biological_process;cellular_component;molecular_function;biological_process;biological_process;cellular_component;molecular_function;biological_process;biological_process;biological_process;biological_process	.	.	.
ENSONIG00000000005 : ENSONIG00000000005 : ENSONIP00000037436.1	ENSONIG00000000005	1.09748	no	up	0.0533617	no	ENSONIP00000037436.1	0.781176	yes	down	0.0226667	yes	GO:0030155;GO:0072357;GO:0035507;GO:0019208;GO:0071889;GO:0004871;GO:0043292	regulation of cell adhesion;PTW/PP1 phosphatase complex;regulation of myosin-light-chain-phosphatase activity;phosphatase regulator activity;14-3-3 protein binding;signal transducer activity;contractile fiber	biological_process;cellular_component;biological_process;molecular_function;molecular_function;molecular_function;cellular_component	ko04810;ko04270;ko04720;ko04510	Regulation of actin cytoskeleton;Vascular smooth muscle contraction;Long-term potentiation;Focal adhesion	Cellular Processes;Organismal Systems;Organismal Systems;Cellular Processes
ENSONIG00000008341 : ENSONIG00000008341 : ENSONIP00000038231.1	ENSONIG00000008341	1.16586	no	up	0.483454	no	ENSONIP00000038231.1	0.995013	no	down	0.812031	no	.	.	.	.	.	.
ENSONIG00000012690 : ENSONIG00000012690 : ENSONIP00000027724.1	ENSONIG00000012690	0.935097	no	down	0.921869	no	ENSONIP00000027724.1	0.909004	no	down	0.630722	no	GO:0047130;GO:0005488;GO:0047131;GO:0005739	saccharopine dehydrogenase (NADP+, L-lysine-forming) activity;binding;saccharopine dehydrogenase (NAD+, L-glutamate-forming) activity;mitochondrion	molecular_function;molecular_function;molecular_function;cellular_component	ko00310;ko00300	Lysine degradation;Lysine biosynthesis	Metabolism;Metabolism
ENSONIG00000000907 : ENSONIG00000000907 : ENSONIP00000001148.2	ENSONIG00000000907	0.913488	no	down	0.481764	no	ENSONIP00000001148.2	0.997337	no	down	0.897562	no	GO:0045202;GO:0017157;GO:0015031;GO:0019905;GO:0031201;GO:0030054;GO:0030659;GO:0005886;GO:0006461;GO:0019717;GO:0016192	synapse;regulation of exocytosis;protein transport;syntaxin binding;SNARE complex;cell junction;cytoplasmic vesicle membrane;plasma membrane;protein complex assembly;synaptosome;vesicle-mediated transport	cellular_component;biological_process;biological_process;molecular_function;cellular_component;cellular_component;cellular_component;cellular_component;biological_process;cellular_component;biological_process	ko04130	SNARE interactions in vesicular transport	Genetic Information Processing
ENSONIG00000006858 : ENSONIG00000006858 : ENSONIP00000008654.2	ENSONIG00000006858	1.22375	no	up	7.90224e-05	yes	ENSONIP00000008654.2	0.891551	no	down	0.101537	no	GO:0006386;GO:0003677;GO:0006359;GO:0032728;GO:0005515;GO:0005666;GO:0006385;GO:0045087;GO:0009615;GO:0045089;GO:0003899	termination of RNA polymerase III transcription;DNA binding;regulation of transcription from RNA polymerase III promoter;positive regulation of interferon-beta production;protein binding;DNA-directed RNA polymerase III complex;transcription elongation from RNA polymerase III promoter;innate immune response;response to virus;positive regulation of innate immune response;DNA-directed RNA polymerase…	biological_process;molecular_function;biological_process;biological_process;molecular_function;cellular_component;biological_process;biological_process;biological_process;biological_process;molecular_function	ko00240;ko03020;ko04623;ko00230	Pyrimidine metabolism;RNA polymerase;Cytosolic DNA-sensing pathway;Purine metabolism	Metabolism;Genetic Information Processing;Organismal Systems;Metabolism
ENSONIG00000012956 : ENSONIG00000012956 : ENSONIP00000016298.2	ENSONIG00000012956	1.03145	no	up	0.48332	no	ENSONIP00000016298.2	0.937036	no	down	0.0467466	yes	GO:0005912;GO:0043066;GO:0005829	adherens junction;negative regulation of apoptosis;cytosol	cellular_component;biological_process;cellular_component	.	.	.
ENSONIG00000009404 : ENSONIG00000009404 : ENSONIP00000081636.1	ENSONIG00000009404	0.865275	no	down	0.117839	no	ENSONIP00000081636.1	0.96528	no	down	0.231123	no	GO:0008285;GO:0019370;GO:0045926;GO:0005737;GO:0050473;GO:0045786;GO:0005506;GO:0016165	negative regulation of cell proliferation;leukotriene biosynthetic process;negative regulation of growth;cytoplasm;arachidonate 15-lipoxygenase activity;negative regulation of cell cycle;iron ion binding;lipoxygenase activity	biological_process;biological_process;biological_process;cellular_component;molecular_function;biological_process;molecular_function;molecular_function	ko00590	Arachidonic acid metabolism	Metabolism
ENSONIG00000006357 : ENSONIG00000006357 : ENSONIP00000077955.1	ENSONIG00000006357	0.766914	no	down	0.0375625	yes	ENSONIP00000077955.1	0.958551	no	down	0.378131	no	GO:0005737;GO:0007165;GO:0046872;GO:0046855;GO:0042803;GO:0008934;GO:0006661	cytoplasm;signal transduction;metal ion binding;inositol phosphate dephosphorylation;protein homodimerization activity;inositol monophosphate phosphatase activity;phosphatidylinositol biosynthetic process	cellular_component;biological_process;molecular_function;biological_process;molecular_function;molecular_function;biological_process	ko00521;ko04070;ko00562	Streptomycin biosynthesis;Phosphatidylinositol signaling system;Inositol phosphate metabolism	Metabolism;Environmental Information Processing;Metabolism
ENSONIG00000015727 : ENSONIG00000015727 : ENSONIP00000057607.1	ENSONIG00000015727	1.13875	no	up	0.00573773	yes	ENSONIP00000057607.1	0.982491	no	down	0.551405	no	GO:0005829;GO:0017111;GO:0005524;GO:0016226;GO:0046872;GO:0051539	cytosol;nucleoside-triphosphatase activity;ATP binding;iron-sulfur cluster assembly;metal ion binding;4 iron, 4 sulfur cluster binding	cellular_component;molecular_function;molecular_function;biological_process;molecular_function;molecular_function	.	.	.
ENSONIG00000003640 : ENSONIG00000003640 : ENSONIP00000070105.1	ENSONIG00000003640	1.39388	no	up	0.0851504	no	ENSONIP00000070105.1	0.905049	no	down	0.0648083	no	GO:0006096;GO:0005524;GO:0003872;GO:0046872;GO:0005945	glycolysis;ATP binding;6-phosphofructokinase activity;metal ion binding;6-phosphofructokinase complex	biological_process;molecular_function;molecular_function;molecular_function;cellular_component	ko00052;ko00030;ko00051;ko00010	Galactose metabolism;Pentose phosphate pathway;Fructose and mannose metabolism;Glycolysis / Gluconeogenesis	Metabolism;Metabolism;Metabolism;Metabolism
ENSONIG00000021083 : ENSONIG00000021083 : ENSONIP00000026385.2	ENSONIG00000021083	0.951272	no	down	0.980681	no	ENSONIP00000026385.2	0.984127	no	down	0.9362	no	GO:0003723;GO:0015031	RNA binding;protein transport	molecular_function;biological_process	.	.	.
ENSONIG00000009983 : ENSONIG00000009983 : ENSONIP00000033666.1	ENSONIG00000009983	0.929495	no	down	0.723252	no	ENSONIP00000033666.1	0.861309	no	down	0.462478	no	GO:0005488	binding	molecular_function	.	.	.
ENSONIG00000019521 : ENSONIG00000019521 : ENSONIP00000057398.1	ENSONIG00000019521	1.58892	no	up	2.10579e-21	yes	ENSONIP00000057398.1	0.890044	no	down	0.122881	no	GO:0046872;GO:0004649;GO:0005737;GO:0005634	metal ion binding;poly(ADP-ribose) glycohydrolase activity;cytoplasm;nucleus	molecular_function;molecular_function;cellular_component;cellular_component	.	.	.
ENSONIG00000004571 : ENSONIG00000004571 : ENSONIP00000005755.1	ENSONIG00000004571	0.632357	no	down	0.000957063	yes	ENSONIP00000005755.1	0.900538	no	down	0.164435	no	GO:0051915;GO:0005625;GO:0007026;GO:0005829;GO:0048471;GO:0008017;GO:0017085;GO:0009743;GO:0010035;GO:0030426;GO:0032403;GO:0001578;GO:0009612;GO:0031116;GO:0071375;GO:0005519;GO:0071363;GO:0014069;GO:0047497;GO:0042493;GO:0032355;GO:0005886;GO:0043204;GO:0014012;GO:0032387;GO:0009790;GO:0030424;GO:0021700;GO:0007417;GO:0045773;GO:0007416;GO:0033189;GO:0005874;GO:0061162;GO:0005875;GO:0045666;GO:…	induction of synaptic plasticity by chemical substance;soluble fraction;negative regulation of microtubule depolymerization;cytosol;perinuclear region of cytoplasm;microtubule binding;response to insecticide;response to carbohydrate stimulus;response to inorganic substance;growth cone;protein complex binding;microtubule bundle formation;response to mechanical stimulus;positive regulation of micro…	biological_process;cellular_component;biological_process;cellular_component;cellular_component;molecular_function;biological_process;biological_process;biological_process;cellular_component;molecular_function;biological_process;biological_process;biological_process;biological_process;molecular_function;biological_process;cellular_component;biological_process;biological_process;biological_process;…	.	.	.
ENSONIG00000015979 : ENSONIG00000015979 : ENSONIP00000020123.2	ENSONIG00000015979	0.955342	no	down	0.932003	no	ENSONIP00000020123.2	0.956947	no	down	0.420355	no	GO:0005085;GO:0006915;GO:0005096;GO:0016020;GO:0051020;GO:0007596;GO:0017124;GO:0007264;GO:0006911;GO:0005525;GO:0007411;GO:0005829;GO:0007229	guanyl-nucleotide exchange factor activity;apoptosis;GTPase activator activity;membrane;GTPase binding;blood coagulation;SH3 domain binding;small GTPase mediated signal transduction;phagocytosis, engulfment;GTP binding;axon guidance;cytosol;integrin-mediated signaling pathway	molecular_function;biological_process;molecular_function;cellular_component;molecular_function;biological_process;molecular_function;biological_process;biological_process;molecular_function;biological_process;cellular_component;biological_process	.	.	.
ENSONIG00000001039 : ENSONIG00000001039 : ENSONIP00000074515.1	ENSONIG00000001039	0.371205	yes	down	2.91387e-10	yes	ENSONIP00000074515.1	0.591247	yes	down	0.00662436	yes	GO:0005789;GO:0005792;GO:0070330;GO:0009055;GO:0020037	endoplasmic reticulum membrane;microsome;aromatase activity;electron carrier activity;heme binding	cellular_component;cellular_component;molecular_function;molecular_function;molecular_function	ko00591;ko00140;ko00983;ko00830;ko00361;ko00980;ko00982	Linoleic acid metabolism;Steroid hormone biosynthesis;Drug metabolism - other enzymes;Retinol metabolism;gamma-Hexachlorocyclohexane degradation;Metabolism of xenobiotics by cytochrome P450;Drug metabolism - cytochrome P450	Metabolism;Metabolism;Metabolism;Metabolism;Metabolism;Metabolism;Metabolism
ENSONIG00000020019 : ENSONIG00000020019 : ENSONIP00000056311.1	ENSONIG00000020019	1.01998	no	up	0.171873	no	ENSONIP00000056311.1	0.978239	no	down	0.803794	no	GO:0005856;GO:0003779;GO:0005737	cytoskeleton;actin binding;cytoplasm	cellular_component;molecular_function;cellular_component	ko05416;ko04530	Viral myocarditis;Tight junction	Human Diseases;Cellular Processes
ENSONIG00000011795 : ENSONIG00000011795 : ENSONIP00000027540.1	ENSONIG00000011795	0.377885	yes	down	1.87021e-63	yes	ENSONIP00000027540.1	1.01579	no	up	0.866225	no	GO:0005622;GO:0005886;GO:0007155;GO:0005102;GO:0004872;GO:0016021;GO:0007411;GO:0007165	intracellular;plasma membrane;cell adhesion;receptor binding;receptor activity;integral to membrane;axon guidance;signal transduction	cellular_component;cellular_component;biological_process;molecular_function;molecular_function;cellular_component;biological_process;biological_process	ko04360	Axon guidance	Organismal Systems
ENSONIG00000014435 : ENSONIG00000014435 : ENSONIP00000018150.2	ENSONIG00000014435	0.941782	no	down	0.884057	no	ENSONIP00000018150.2	0.872971	no	down	0.0259862	yes	GO:0005737;GO:0030145;GO:0006508;GO:0008235;GO:0004177	cytoplasm;manganese ion binding;proteolysis;metalloexopeptidase activity;aminopeptidase activity	cellular_component;molecular_function;biological_process;molecular_function;molecular_function	ko00480	Glutathione metabolism	Metabolism
ENSONIG00000012150 : ENSONIG00000012150 : ENSONIP00000072137.1	ENSONIG00000012150	0.965633	no	down	0.803754	no	ENSONIP00000072137.1	0.937984	no	down	0.000528143	yes	GO:0016071;GO:0051000;GO:0008286;GO:0043325;GO:0005886;GO:0010975;GO:0006809;GO:0006006;GO:0005547;GO:0005524;GO:0006469;GO:0008543;GO:0008633;GO:0051091;GO:0009408;GO:0090004;GO:0045725;GO:0042802;GO:0043536;GO:0031295;GO:0018105;GO:0010748;GO:0034405;GO:0005829;GO:0004674;GO:0005654;GO:0006417;GO:0008643;GO:0070141;GO:0048009;GO:0030168;GO:0046777;GO:0030307;GO:0030235;GO:0048015;GO:0033138;GO:…	mRNA metabolic process;positive regulation of nitric-oxide synthase activity;insulin receptor signaling pathway;phosphatidylinositol-3,4-bisphosphate binding;plasma membrane;regulation of neuron projection development;nitric oxide biosynthetic process;glucose metabolic process;phosphatidylinositol-3,4,5-trisphosphate binding;ATP binding;negative regulation of protein kinase activity;fibroblast gr…	biological_process;biological_process;biological_process;molecular_function;cellular_component;biological_process;biological_process;biological_process;molecular_function;molecular_function;biological_process;biological_process;biological_process;biological_process;biological_process;biological_process;biological_process;molecular_function;biological_process;biological_process;biological_process;…	ko04510;ko05211;ko04012;ko04920;ko05223;ko04370;ko05220;ko04914;ko04150;ko04666;ko04530;ko04010;ko05221;ko05215;ko05210;ko05214;ko04722;ko04210;ko05142;ko05212;ko04620;ko05218;ko04664;ko05222;ko04662;ko04062;ko04910;ko05213;ko04660;ko05200;ko04630	Focal adhesion;Renal cell carcinoma;ErbB signaling pathway;Adipocytokine signaling pathway;Non-small cell lung cancer;VEGF signaling pathway;Chronic myeloid leukemia;Progesterone-mediated oocyte maturation;mTOR signaling pathway;Fc gamma R-mediated phagocytosis;Tight junction;MAPK signaling pathway;Acute myeloid leukemia;Prostate cancer;Colorectal cancer;Glioma;Neurotrophin signaling pathway;Apop…	Cellular Processes;Human Diseases;Environmental Information Processing;Organismal Systems;Human Diseases;Environmental Information Processing;Human Diseases;Organismal Systems;Environmental Information Processing;Organismal Systems;Cellular Processes;Environmental Information Processing;Human Diseases;Human Diseases;Human Diseases;Human Diseases;Organismal Systems;Cellular Processes;Human Disease…
ENSONIG00000011814 : ENSONIG00000011814 : ENSONIP00000014874.2	ENSONIG00000011814	0.544233	no	down	6.52429e-05	yes	ENSONIP00000014874.2	0.818981	yes	down	0.0013764	yes	GO:0005737;GO:0008270	cytoplasm;zinc ion binding	cellular_component;molecular_function	ko04920;ko05340;ko05220;ko04621;ko04210;ko04622;ko05221;ko05215;ko05120;ko04010;ko04623;ko04620;ko05131;ko05212;ko05142;ko05222;ko04662;ko04062;ko04660;ko05200	Adipocytokine signaling pathway;Primary immunodeficiency;Chronic myeloid leukemia;NOD-like receptor signaling pathway;Apoptosis;RIG-I-like receptor signaling pathway;Acute myeloid leukemia;Prostate cancer;Epithelial cell signaling in Helicobacter pylori infection;MAPK signaling pathway;Cytosolic DNA-sensing pathway;Toll-like receptor signaling pathway;Shigellosis;Pancreatic cancer;Chagas disease;…	Organismal Systems;Human Diseases;Human Diseases;Organismal Systems;Cellular Processes;Organismal Systems;Human Diseases;Human Diseases;Human Diseases;Environmental Information Processing;Organismal Systems;Organismal Systems;Human Diseases;Human Diseases;Human Diseases;Human Diseases;Organismal Systems;Organismal Systems;Organismal Systems;Human Diseases
ENSONIG00000002512 : ENSONIG00000002512 : ENSONIP00000078879.1	ENSONIG00000002512	0.954485	no	down	0.930053	no	ENSONIP00000078879.1	0.850401	no	down	0.0224471	yes	.	.	.	.	.	.
ENSONIG00000002996 : ENSONIG00000002996 : ENSONIP00000003752.2	ENSONIG00000002996	1.07055	no	up	0.121688	no	ENSONIP00000003752.2	0.935806	no	down	0.275446	no	GO:0004493;GO:0046491;GO:0006635;GO:0005759	methylmalonyl-CoA epimerase activity;L-methylmalonyl-CoA metabolic process;fatty acid beta-oxidation;mitochondrial matrix	molecular_function;biological_process;biological_process;cellular_component	ko00640;ko00280	Propanoate metabolism;Valine, leucine and isoleucine degradation	Metabolism;Metabolism
ENSONIG00000013163 : ENSONIG00000013163 : ENSONIP00000066566.1	ENSONIG00000013163	0.86471	no	down	0.153877	no	ENSONIP00000066566.1	0.952799	no	down	0.525518	no	GO:0006886;GO:0005509;GO:0006897;GO:0030121	intracellular protein transport;calcium ion binding;endocytosis;AP-1 adaptor complex	biological_process;molecular_function;biological_process;cellular_component	.	.	.
ENSONIG00000001307 : ENSONIG00000001307 : ENSONIP00000070837.1	ENSONIG00000001307	0.93168	no	down	0.763189	no	ENSONIP00000070837.1	0.976614	no	down	0.751153	no	GO:0006357;GO:0005737;GO:0008023;GO:0004402;GO:0051536;GO:0006351;GO:0007409;GO:0008607;GO:0046872	regulation of transcription from RNA polymerase II promoter;cytoplasm;transcription elongation factor complex;histone acetyltransferase activity;iron-sulfur cluster binding;transcription, DNA-dependent;axonogenesis;phosphorylase kinase regulator activity;metal ion binding	biological_process;cellular_component;cellular_component;molecular_function;molecular_function;biological_process;biological_process;molecular_function;molecular_function	.	.	.
ENSONIG00000002059 : ENSONIG00000002059 : ENSONIP00000002570.2	ENSONIG00000002059	0.547926	no	down	0.000271066	yes	ENSONIP00000002570.2	1.02293	no	up	0.633429	no	.	.	.	.	.	.
ENSONIG00000015833 : ENSONIG00000015833 : ENSONIP00000071576.1	ENSONIG00000015833	1.35016	no	up	1.4194e-06	yes	ENSONIP00000071576.1	1.01986	no	up	0.629476	no	GO:0005509;GO:0005516;GO:0005829;GO:0008135;GO:0005524;GO:0004686;GO:0006414;GO:0008286	calcium ion binding;calmodulin binding;cytosol;translation factor activity, nucleic acid binding;ATP binding;elongation factor-2 kinase activity;translational elongation;insulin receptor signaling pathway	molecular_function;molecular_function;cellular_component;molecular_function;molecular_function;molecular_function;biological_process;biological_process	.	.	.
ENSONIG00000015598 : ENSONIG00000015598 : ENSONIP00000079569.1	ENSONIG00000015598	1.04706	no	up	0.0689429	no	ENSONIP00000079569.1	1.07111	no	up	0.136147	no	GO:0016055;GO:0005524;GO:0004674	Wnt receptor signaling pathway;ATP binding;protein serine/threonine kinase activity	biological_process;molecular_function;molecular_function	ko04520;ko04310;ko04712;ko04530	Adherens junction;Wnt signaling pathway;Circadian rhythm - plant;Tight junction	Cellular Processes;Environmental Information Processing;Organismal Systems;Cellular Processes
ENSONIG00000014809 : ENSONIG00000014809 : ENSONIP00000018645.2	ENSONIG00000014809	1.13866	no	up	0.000582399	yes	ENSONIP00000018645.2	0.968504	no	down	0.570472	no	GO:0033180;GO:0016021;GO:0005524;GO:0046961;GO:0046933;GO:0005774;GO:0015991	proton-transporting V-type ATPase, V1 domain;integral to membrane;ATP binding;proton-transporting ATPase activity, rotational mechanism;hydrogen ion transporting ATP synthase activity, rotational mechanism;vacuolar membrane;ATP hydrolysis coupled proton transport	cellular_component;cellular_component;molecular_function;molecular_function;molecular_function;cellular_component;biological_process	ko00190;ko05110;ko04142;ko05120;ko04145	Oxidative phosphorylation;Vibrio cholerae infection;Lysosome;Epithelial cell signaling in Helicobacter pylori infection;Phagosome	Metabolism;Human Diseases;Cellular Processes;Human Diseases;Cellular Processes
ENSONIG00000002254 : ENSONIG00000002254 : ENSONIP00000002813.1	ENSONIG00000002254	1.46662	no	up	1.03872e-14	yes	ENSONIP00000002813.1	0.963666	no	down	0.545003	no	GO:0016021;GO:0005743;GO:0055085;GO:0005488	integral to membrane;mitochondrial inner membrane;transmembrane transport;binding	cellular_component;cellular_component;biological_process;molecular_function	.	.	.
ENSONIG00000011270 : ENSONIG00000011270 : ENSONIP00000014184.2	ENSONIG00000011270	1.00804	no	up	0.274165	no	ENSONIP00000014184.2	1.10305	no	up	0.0676388	no	GO:0051693;GO:0005916;GO:0030507;GO:0033270;GO:0030018;GO:0046982;GO:0005516;GO:0003779;GO:0032437;GO:0005509;GO:0016328	actin filament capping;fascia adherens;spectrin binding;paranode region of axon;Z disc;protein heterodimerization activity;calmodulin binding;actin binding;cuticular plate;calcium ion binding;lateral plasma membrane	biological_process;cellular_component;molecular_function;cellular_component;cellular_component;molecular_function;molecular_function;molecular_function;cellular_component;molecular_function;cellular_component	.	.	.
ENSONIG00000004759 : ENSONIG00000004759 : ENSONIP00000005988.2	ENSONIG00000004759	1.10283	no	up	0.00213293	yes	ENSONIP00000005988.2	0.929582	no	down	0.0513292	no	GO:0005524;GO:0006950	ATP binding;response to stress	molecular_function;biological_process	ko04144;ko03040;ko04612;ko04010	Endocytosis;Spliceosome;Antigen processing and presentation;MAPK signaling pathway	Cellular Processes;Genetic Information Processing;Organismal Systems;Environmental Information Processing
ENSONIG00000016633 : ENSONIG00000016633 : ENSONIP00000020953.1	ENSONIG00000016633	0.996816	no	down	0.405643	no	ENSONIP00000020953.1	1.01952	no	up	0.50937	no	GO:0004815;GO:0070145;GO:0005634;GO:0000049;GO:0050560;GO:0005524;GO:0042803;GO:0005759	aspartate-tRNA ligase activity;mitochondrial asparaginyl-tRNA aminoacylation;nucleus;tRNA binding;aspartate-tRNA(Asn) ligase activity;ATP binding;protein homodimerization activity;mitochondrial matrix	molecular_function;biological_process;cellular_component;molecular_function;molecular_function;molecular_function;molecular_function;cellular_component	ko00970	Aminoacyl-tRNA biosynthesis	Genetic Information Processing
ENSONIG00000010235 : ENSONIG00000010235 : ENSONIP00000070059.1	ENSONIG00000010235	0.998674	no	down	0.380166	no	ENSONIP00000070059.1	0.995012	no	down	0.748524	no	GO:0003743;GO:0005852	translation initiation factor activity;eukaryotic translation initiation factor 3 complex	molecular_function;cellular_component	.	.	.
ENSONIG00000019726 : ENSONIG00000019726 : ENSONIP00000024829.2	ENSONIG00000019726	0.933206	no	down	0.784128	no	ENSONIP00000024829.2	1.06186	no	up	0.531798	no	.	.	.	.	.	.
ENSONIG00000003737 : ENSONIG00000003737 : ENSONIP00000004699.2	ENSONIG00000003737	1.15495	no	up	0.000666881	yes	ENSONIP00000004699.2	0.963993	no	down	0.473534	no	GO:0005783	endoplasmic reticulum	cellular_component	ko04010	MAPK signaling pathway	Environmental Information Processing
ENSONIG00000012392 : ENSONIG00000012392 : ENSONIP00000015608.1	ENSONIG00000012392	0.972215	no	down	0.676988	no	ENSONIP00000015608.1	1.02908	no	up	0.821765	no	GO:0005783;GO:0006950;GO:0001671;GO:0005829;GO:0051087;GO:0006457	endoplasmic reticulum;response to stress;ATPase activator activity;cytosol;chaperone binding;protein folding	cellular_component;biological_process;molecular_function;cellular_component;molecular_function;biological_process	.	.	.
ENSONIG00000002069 : ENSONIG00000002069 : ENSONIP00000002581.2	ENSONIG00000002069	0.840933	no	down	0.559012	no	ENSONIP00000002581.2	0.844711	no	down	0.615233	no	GO:0016874	ligase activity	molecular_function	.	.	.
ENSONIG00000017278 : ENSONIG00000017278 : ENSONIP00000059128.1	ENSONIG00000017278	1.03183	no	up	0.160535	no	ENSONIP00000059128.1	0.884422	no	down	0.0614632	no	GO:0005789;GO:0046872;GO:0005525;GO:0006886;GO:0032580	endoplasmic reticulum membrane;metal ion binding;GTP binding;intracellular protein transport;Golgi cisterna membrane	cellular_component;molecular_function;molecular_function;biological_process;cellular_component	.	.	.
ENSONIG00000020273 : ENSONIG00000020273 : ENSONIP00000025544.2	ENSONIG00000020273	1.21241	no	up	9.34694e-05	yes	ENSONIP00000025544.2	1.19138	no	up	0.0736123	no	GO:0006626;GO:0005739;GO:0005524;GO:0004810;GO:0000049;GO:0042780	protein targeting to mitochondrion;mitochondrion;ATP binding;tRNA adenylyltransferase activity;tRNA binding;tRNA 3'-end processing	biological_process;cellular_component;molecular_function;molecular_function;molecular_function;biological_process	.	.	.
ENSONIG00000005153 : ENSONIG00000005153 : ENSONIP00000006476.2	ENSONIG00000005153	0.901869	no	down	0.321689	no	ENSONIP00000006476.2	0.743679	yes	down	0.0184088	yes	GO:0033180;GO:0015991;GO:0005829;GO:0005524;GO:0046961;GO:0046933	proton-transporting V-type ATPase, V1 domain;ATP hydrolysis coupled proton transport;cytosol;ATP binding;proton-transporting ATPase activity, rotational mechanism;hydrogen ion transporting ATP synthase activity, rotational mechanism	cellular_component;biological_process;cellular_component;molecular_function;molecular_function;molecular_function	ko00190;ko05120;ko04966;ko05110;ko04145	Oxidative phosphorylation;Epithelial cell signaling in Helicobacter pylori infection;Collecting duct acid secretion;Vibrio cholerae infection;Phagosome	Metabolism;Human Diseases;Organismal Systems;Human Diseases;Cellular Processes
ENSONIG00000005146 : ENSONIG00000005146 : ENSONIP00000070225.1	ENSONIG00000005146	1.45177	no	up	0.156943	no	ENSONIP00000070225.1	1.50417	yes	up	0.00494781	yes	GO:0005581;GO:0005201	collagen;extracellular matrix structural constituent	cellular_component;molecular_function	ko04510;ko04512	Focal adhesion;ECM-receptor interaction	Cellular Processes;Environmental Information Processing
ENSONIG00000005094 : ENSONIG00000005094 : ENSONIP00000065925.1	ENSONIG00000005094	0.956254	no	down	0.900101	no	ENSONIP00000065925.1	0.931445	no	down	0.0170311	yes	GO:0007017;GO:0005815;GO:0016020;GO:0031982;GO:0030286;GO:0005874;GO:0035088;GO:0010001;GO:0045494;GO:0005869;GO:0001754;GO:0030719;GO:0003774;GO:0040023;GO:0060117	microtubule-based process;microtubule organizing center;membrane;vesicle;dynein complex;microtubule;establishment or maintenance of apical/basal cell polarity;glial cell differentiation;photoreceptor cell maintenance;dynactin complex;eye photoreceptor cell differentiation;P granule organization;motor activity;establishment of nucleus localization;auditory receptor cell development	biological_process;cellular_component;cellular_component;cellular_component;cellular_component;cellular_component;biological_process;biological_process;biological_process;cellular_component;biological_process;biological_process;molecular_function;biological_process;biological_process	ko04962;ko05016	Vasopressin-regulated water reabsorption;Huntington's disease	Organismal Systems;Human Diseases
ENSONIG00000000726 : ENSONIG00000000726 : ENSONIP00000000917.2	ENSONIG00000000726	0.853213	no	down	0.0730278	no	ENSONIP00000000917.2	0.930502	no	down	0.132155	no	GO:0016020;GO:0006915;GO:0005634;GO:0017124;GO:0007275;GO:0017048;GO:0046872;GO:0048471;GO:0040008;GO:0005524;GO:0004674	membrane;apoptosis;nucleus;SH3 domain binding;multicellular organismal development;Rho GTPase binding;metal ion binding;perinuclear region of cytoplasm;regulation of growth;ATP binding;protein serine/threonine kinase activity	cellular_component;biological_process;cellular_component;molecular_function;biological_process;molecular_function;molecular_function;cellular_component;biological_process;molecular_function;molecular_function	ko04660;ko04810;ko05211;ko04012;ko04510;ko04360;ko04010	T cell receptor signaling pathway;Regulation of actin cytoskeleton;Renal cell carcinoma;ErbB signaling pathway;Focal adhesion;Axon guidance;MAPK signaling pathway	Organismal Systems;Cellular Processes;Human Diseases;Environmental Information Processing;Cellular Processes;Organismal Systems;Environmental Information Processing
ENSONIG00000016565 : ENSONIG00000016565 : ENSONIP00000020860.2	ENSONIG00000016565	0.923937	no	down	0.601335	no	ENSONIP00000020860.2	1.29621	yes	up	0.00129165	yes	.	.	.	ko00310	Lysine degradation	Metabolism
ENSONIG00000009853 : ENSONIG00000009853 : ENSONIP00000012380.1	ENSONIG00000009853	1.00431	no	up	0.424407	no	ENSONIP00000012380.1	0.93299	no	down	0.0762097	no	.	.	.	ko04145;ko04144	Phagosome;Endocytosis	Cellular Processes;Cellular Processes
ENSONIG00000014618 : ENSONIG00000014618 : ENSONIP00000018403.2	ENSONIG00000014618	0.0144606	yes	down	1	no	ENSONIP00000018403.2	1.4576	yes	up	0.00416729	yes	GO:0008104;GO:0031340;GO:0048791;GO:0019905;GO:0005215;GO:0005886;GO:0008021;GO:0032024;GO:0045956;GO:0005544	protein localization;positive regulation of vesicle fusion;calcium ion-dependent exocytosis of neurotransmitter;syntaxin binding;transporter activity;plasma membrane;synaptic vesicle;positive regulation of insulin secretion;positive regulation of calcium ion-dependent exocytosis;calcium-dependent phospholipid binding	biological_process;biological_process;biological_process;molecular_function;molecular_function;cellular_component;cellular_component;biological_process;biological_process;molecular_function	ko04610	Complement and coagulation cascades	Organismal Systems
ENSONIG00000013162 : ENSONIG00000013162 : ENSONIP00000054644.1	ENSONIG00000013162	0.836645	no	down	0.151893	no	ENSONIP00000054644.1	0.880288	no	down	0.0178288	yes	GO:0004034;GO:0005737;GO:0019318;GO:0030246	aldose 1-epimerase activity;cytoplasm;hexose metabolic process;carbohydrate binding	molecular_function;cellular_component;biological_process;molecular_function	ko00010	Glycolysis / Gluconeogenesis	Metabolism
ENSONIG00000008130 : ENSONIG00000008130 : ENSONIP00000045221.1	ENSONIG00000008130	1.57884	no	up	5.0541e-05	yes	ENSONIP00000045221.1	0.955034	no	down	0.411053	no	.	.	.	ko05012	Parkinson's disease	Human Diseases
ENSONIG00000007388 : ENSONIG00000007388 : ENSONIP00000009316.1	ENSONIG00000007388	0.931857	no	down	0.71945	no	ENSONIP00000009316.1	0.942681	no	down	0.464829	no	GO:0005643;GO:0055085;GO:0016032;GO:0010827;GO:0005975;GO:0015758;GO:0015031;GO:0051028	nuclear pore;transmembrane transport;viral reproduction;regulation of glucose transport;carbohydrate metabolic process;glucose transport;protein transport;mRNA transport	cellular_component;biological_process;biological_process;biological_process;biological_process;biological_process;biological_process;biological_process	.	.	.
ENSONIG00000003828 : ENSONIG00000003828 : ENSONIP00000004821.1	ENSONIG00000003828	0.914668	no	down	0.493405	no	ENSONIP00000004821.1	1.0377	no	up	0.145401	no	GO:0005683;GO:0006369;GO:0071208;GO:0071013;GO:0005654;GO:0000387;GO:0034660;GO:0005829;GO:0005689;GO:0008334;GO:0019899	U7 snRNP;termination of RNA polymerase II transcription;histone pre-mRNA DCP binding;catalytic step 2 spliceosome;nucleoplasm;spliceosomal snRNP assembly;ncRNA metabolic process;cytosol;U12-type spliceosomal complex;histone mRNA metabolic process;enzyme binding	cellular_component;biological_process;molecular_function;cellular_component;cellular_component;biological_process;biological_process;cellular_component;cellular_component;biological_process;molecular_function	ko05322;ko03040	Systemic lupus erythematosus;Spliceosome	Human Diseases;Genetic Information Processing
ENSONIG00000003686 : ENSONIG00000003686 : ENSONIP00000057367.1	ENSONIG00000003686	1.33194	no	up	0.00114206	yes	ENSONIP00000057367.1	0.987082	no	down	0.565963	no	GO:0000276;GO:0015986;GO:0015078	mitochondrial proton-transporting ATP synthase complex, coupling factor F(o);ATP synthesis coupled proton transport;hydrogen ion transmembrane transporter activity	cellular_component;biological_process;molecular_function	ko00190	Oxidative phosphorylation	Metabolism
ENSONIG00000010111 : ENSONIG00000010111 : ENSONIP00000012715.2	ENSONIG00000010111	0.482073	yes	down	6.77181e-07	yes	ENSONIP00000012715.2	0.98544	no	down	0.720884	no	GO:0005826;GO:0060328;GO:0030038;GO:0031034;GO:0032060;GO:0042803;GO:0046847;GO:0030866;GO:0031154;GO:0032982;GO:0008104;GO:0001931;GO:0030837;GO:0016460;GO:0030898;GO:0000910;GO:0042641;GO:0000146;GO:0005524;GO:0003774;GO:0005516;GO:0003779;GO:0031270;GO:0051015;GO:0033275;GO:0034461;GO:0006935;GO:0030016	actomyosin contractile ring;cytoplasmic actin-based contraction involved in forward cell motility;contractile actin filament bundle assembly;myosin filament assembly;bleb assembly;protein homodimerization activity;filopodium assembly;cortical actin cytoskeleton organization;culmination involved in sorocarp development;myosin filament;protein localization;uropod;negative regulation of actin filame…	cellular_component;biological_process;biological_process;biological_process;biological_process;molecular_function;biological_process;biological_process;biological_process;cellular_component;biological_process;cellular_component;biological_process;cellular_component;molecular_function;biological_process;cellular_component;molecular_function;molecular_function;molecular_function;molecular_function;…	ko04530;ko05416	Tight junction;Viral myocarditis	Cellular Processes;Human Diseases
ENSONIG00000004263 : ENSONIG00000004263 : ENSONIP00000005367.2	ENSONIG00000004263	1.01372	no	up	0.197099	no	ENSONIP00000005367.2	0.999	no	down	0.978073	no	GO:0004519;GO:0005634;GO:0005515;GO:0005886;GO:0003677;GO:0004003;GO:0003723;GO:0006810;GO:0004004;GO:0005829;GO:0007265;GO:0005524	endonuclease activity;nucleus;protein binding;plasma membrane;DNA binding;ATP-dependent DNA helicase activity;RNA binding;transport;ATP-dependent RNA helicase activity;cytosol;Ras protein signal transduction;ATP binding	molecular_function;cellular_component;molecular_function;cellular_component;molecular_function;molecular_function;molecular_function;biological_process;molecular_function;cellular_component;biological_process;molecular_function	ko04070;ko00562	Phosphatidylinositol signaling system;Inositol phosphate metabolism	Environmental Information Processing;Metabolism
ENSONIG00000005246 : ENSONIG00000005246 : ENSONIP00000057618.1	ENSONIG00000005246	1.13034	no	up	0.426252	no	ENSONIP00000057618.1	0.963678	no	down	0.546318	no	.	.	.	.	.	.
ENSONIG00000009085 : ENSONIG00000009085 : ENSONIP00000011424.1	ENSONIG00000009085	0.820287	no	down	0.00281342	yes	ENSONIP00000011424.1	0.960144	no	down	0.730593	no	GO:0003723	RNA binding	molecular_function	.	.	.
ENSONIG00000009780 : ENSONIG00000009780 : ENSONIP00000012288.1	ENSONIG00000009780	1.0076	no	up	0.413325	no	ENSONIP00000012288.1	1.24094	yes	up	0.0151593	yes	GO:0016021	integral to membrane	cellular_component	.	.	.
ENSONIG00000013237 : ENSONIG00000013237 : ENSONIP00000016645.1	ENSONIG00000013237	1.36836	no	up	8.92501e-13	yes	ENSONIP00000016645.1	1.06186	no	up	0.449725	no	GO:0003729;GO:0005634;GO:0045893;GO:0030529;GO:0005737;GO:0001837;GO:0006351;GO:0000166	mRNA binding;nucleus;positive regulation of transcription, DNA-dependent;ribonucleoprotein complex;cytoplasm;epithelial to mesenchymal transition;transcription, DNA-dependent;nucleotide binding	molecular_function;cellular_component;biological_process;cellular_component;cellular_component;biological_process;biological_process;molecular_function	ko04320	Dorso-ventral axis formation	Organismal Systems
ENSONIG00000002489 : ENSONIG00000002489 : ENSONIP00000003117.2	ENSONIG00000002489	1.08311	no	up	0.0521041	no	ENSONIP00000003117.2	0.762115	yes	down	0.00913627	yes	GO:0046477;GO:0005576;GO:0005764;GO:0043169;GO:0052692;GO:0042803;GO:0005102;GO:0046479;GO:0005794;GO:0009311;GO:0045019;GO:0016139;GO:0051001	glycosylceramide catabolic process;extracellular region;lysosome;cation binding;raffinose alpha-galactosidase activity;protein homodimerization activity;receptor binding;glycosphingolipid catabolic process;Golgi apparatus;oligosaccharide metabolic process;negative regulation of nitric oxide biosynthetic process;glycoside catabolic process;negative regulation of nitric-oxide synthase activity	biological_process;cellular_component;cellular_component;molecular_function;molecular_function;molecular_function;molecular_function;biological_process;cellular_component;biological_process;biological_process;biological_process;biological_process	ko00600;ko00052;ko04142;ko00603;ko00561	Sphingolipid metabolism;Galactose metabolism;Lysosome;Glycosphingolipid biosynthesis - globo series;Glycerolipid metabolism	Metabolism;Metabolism;Cellular Processes;Metabolism;Metabolism
ENSONIG00000019382 : ENSONIG00000019382 : ENSONIP00000034407.1	ENSONIG00000019382	0.863331	no	down	0.129612	no	ENSONIP00000034407.1	0.92123	no	down	0.0418909	yes	GO:0004373;GO:0005978	glycogen (starch) synthase activity;glycogen biosynthetic process	molecular_function;biological_process	ko00500;ko04910	Starch and sucrose metabolism;Insulin signaling pathway	Metabolism;Organismal Systems
ENSONIG00000002815 : ENSONIG00000002815 : ENSONIP00000065383.1	ENSONIG00000002815	3.18429	yes	up	3.2203e-35	yes	ENSONIP00000065383.1	1.05939	no	up	0.161083	no	GO:0048013;GO:0005856;GO:0005925;GO:0005524;GO:0018108;GO:0007172;GO:0007411;GO:0006921;GO:0042169;GO:0033628;GO:0007596;GO:0004871;GO:0046777;GO:0060396;GO:0007229;GO:0005829;GO:0004715;GO:0008432	ephrin receptor signaling pathway;cytoskeleton;focal adhesion;ATP binding;peptidyl-tyrosine phosphorylation;signal complex assembly;axon guidance;cellular component disassembly involved in apoptosis;SH2 domain binding;regulation of cell adhesion mediated by integrin;blood coagulation;signal transducer activity;protein autophosphorylation;growth hormone receptor signaling pathway;integrin-mediated…	biological_process;cellular_component;cellular_component;molecular_function;biological_process;biological_process;biological_process;biological_process;molecular_function;biological_process;biological_process;molecular_function;biological_process;biological_process;biological_process;cellular_component;molecular_function;molecular_function	ko04012;ko04510;ko04670;ko04360;ko04370;ko05222;ko04062;ko04810;ko05100;ko05200	ErbB signaling pathway;Focal adhesion;Leukocyte transendothelial migration;Axon guidance;VEGF signaling pathway;Small cell lung cancer;Chemokine signaling pathway;Regulation of actin cytoskeleton;Bacterial invasion of epithelial cells;Pathways in cancer	Environmental Information Processing;Cellular Processes;Organismal Systems;Organismal Systems;Environmental Information Processing;Human Diseases;Organismal Systems;Cellular Processes;Human Diseases;Human Diseases
ENSONIG00000000836 : ENSONIG00000000836 : ENSONIP00000001061.1	ENSONIG00000000836	0.960932	no	down	0.917208	no	ENSONIP00000001061.1	0.901141	no	down	0.249947	no	GO:0008270;GO:0045892;GO:0060632;GO:0070301;GO:0005901;GO:0010727;GO:0010870;GO:0034983;GO:0090042;GO:0070848;GO:0090035;GO:0046970;GO:0070846;GO:0031593;GO:0005875;GO:0043065;GO:0051879;GO:0046969;GO:0003779;GO:0006515;GO:0009636;GO:0008013;GO:0042903;GO:0016236;GO:0070840;GO:0005829;GO:0048471;GO:0060765;GO:0070845;GO:0010634;GO:0000118;GO:0031252;GO:0016235;GO:0006351;GO:0048156;GO:0032041;GO:…	zinc ion binding;negative regulation of transcription, DNA-dependent;regulation of microtubule-based movement;cellular response to hydrogen peroxide;caveola;negative regulation of hydrogen peroxide metabolic process;positive regulation of receptor biosynthetic process;peptidyl-lysine deacetylation;tubulin deacetylation;response to growth factor stimulus;positive regulation of cellular chaperone-m…	molecular_function;biological_process;biological_process;biological_process;cellular_component;biological_process;biological_process;biological_process;biological_process;biological_process;biological_process;molecular_function;biological_process;molecular_function;cellular_component;biological_process;molecular_function;molecular_function;molecular_function;biological_process;biological_process;…	.	.	.
ENSONIG00000020815 : ENSONIG00000020815 : ENSONIP00000026119.1	ENSONIG00000020815	0.662897	no	down	0.0400665	yes	ENSONIP00000026119.1	0.927401	no	down	0.113441	no	GO:0016021	integral to membrane	cellular_component	ko04640;ko04512	Hematopoietic cell lineage;ECM-receptor interaction	Organismal Systems;Environmental Information Processing
ENSONIG00000014828 : ENSONIG00000014828 : ENSONIP00000044157.1	ENSONIG00000014828	1.06828	no	up	0.164842	no	ENSONIP00000044157.1	0.781705	yes	down	0.0429955	yes	GO:0004222;GO:0007548;GO:0050435;GO:0005615;GO:0004871;GO:0005625;GO:0010815;GO:0044419;GO:0009986;GO:0005524;GO:0042803;GO:0008270	metalloendopeptidase activity;sex differentiation;beta-amyloid metabolic process;extracellular space;signal transducer activity;soluble fraction;bradykinin catabolic process;interspecies interaction between organisms;cell surface;ATP binding;protein homodimerization activity;zinc ion binding	molecular_function;biological_process;biological_process;cellular_component;molecular_function;cellular_component;biological_process;biological_process;cellular_component;molecular_function;molecular_function;molecular_function	ko05010	Alzheimer's disease	Human Diseases
ENSONIG00000012913 : ENSONIG00000012913 : ENSONIP00000016248.1	ENSONIG00000012913	1.51839	no	up	7.53768e-17	yes	ENSONIP00000016248.1	1.08406	no	up	0.0233262	yes	GO:0016884;GO:0016021;GO:0016787	carbon-nitrogen ligase activity, with glutamine as amido-N-donor;integral to membrane;hydrolase activity	molecular_function;cellular_component;molecular_function	ko00460;ko00360;ko00380;ko00330;ko00643	Cyanoamino acid metabolism;Phenylalanine metabolism;Tryptophan metabolism;Arginine and proline metabolism;Styrene degradation	Metabolism;Metabolism;Metabolism;Metabolism;Metabolism
ENSONIG00000014488 : ENSONIG00000014488 : ENSONIP00000018226.2	ENSONIG00000014488	0.925326	no	down	0.647008	no	ENSONIP00000018226.2	0.862465	no	down	0.248227	no	GO:0006334;GO:0005737;GO:0005678;GO:0051082;GO:0005634	nucleosome assembly;cytoplasm;chromatin assembly complex;unfolded protein binding;nucleus	biological_process;cellular_component;cellular_component;molecular_function;cellular_component	.	.	.
ENSONIG00000016952 : ENSONIG00000016952 : ENSONIP00000021379.1	ENSONIG00000016952	0.702326	no	down	1	no	ENSONIP00000021379.1	0.737619	yes	down	0.0305499	yes	GO:0005634;GO:0001077;GO:0005515;GO:0003677;GO:0043234;GO:0007275;GO:0030318;GO:0006461	nucleus;RNA polymerase II core promoter proximal region sequence-specific DNA binding transcription factor activity involved in positive regulation of transcription;protein binding;DNA binding;protein complex;multicellular organismal development;melanocyte differentiation;protein complex assembly	cellular_component;molecular_function;molecular_function;molecular_function;cellular_component;biological_process;biological_process;biological_process	ko05200;ko05218;ko04916	Pathways in cancer;Melanoma;Melanogenesis	Human Diseases;Human Diseases;Organismal Systems
ENSONIG00000011789 : ENSONIG00000011789 : ENSONIP00000078628.1	ENSONIG00000011789	0.900193	no	down	0.343468	no	ENSONIP00000078628.1	0.929582	no	down	0.0604903	no	GO:0070933;GO:0001078;GO:0007596;GO:0005515;GO:0044212;GO:0017053;GO:0044419	histone H4 deacetylation;RNA polymerase II core promoter proximal region sequence-specific DNA binding transcription factor activity involved in negative regulation of transcription;blood coagulation;protein binding;transcription regulatory region DNA binding;transcriptional repressor complex;interspecies interaction between organisms	biological_process;molecular_function;biological_process;molecular_function;molecular_function;cellular_component;biological_process	ko05016	Huntington's disease	Human Diseases
ENSONIG00000007743 : ENSONIG00000007743 : ENSONIP00000030293.1	ENSONIG00000007743	0.804947	no	down	0.0624863	no	ENSONIP00000030293.1	0.903871	no	down	0.275151	no	GO:0016874;GO:0016925;GO:0008641;GO:0008022;GO:0005634	ligase activity;protein sumoylation;small protein activating enzyme activity;protein C-terminus binding;nucleus	molecular_function;biological_process;molecular_function;molecular_function;cellular_component	ko04120	Ubiquitin mediated proteolysis	Genetic Information Processing
ENSONIG00000010210 : ENSONIG00000010210 : ENSONIP00000064599.1	ENSONIG00000010210	0.99787	no	down	0.440785	no	ENSONIP00000064599.1	0.99071	no	down	0.844977	no	GO:0005829;GO:0050708;GO:0000139;GO:0006886	cytosol;regulation of protein secretion;Golgi membrane;intracellular protein transport	cellular_component;biological_process;cellular_component;biological_process	.	.	.
ENSONIG00000005316 : ENSONIG00000005316 : ENSONIP00000049571.1	ENSONIG00000005316	0.948778	no	down	0.981246	no	ENSONIP00000049571.1	0.962709	no	down	0.0287982	yes	GO:0005086;GO:0032012;GO:0005622	ARF guanyl-nucleotide exchange factor activity;regulation of ARF protein signal transduction;intracellular	molecular_function;biological_process;cellular_component	ko04144	Endocytosis	Cellular Processes
ENSONIG00000015252 : ENSONIG00000015252 : ENSONIP00000019193.2	ENSONIG00000015252	1.07689	no	up	0.0302448	yes	ENSONIP00000019193.2	1.00468	no	up	0.946778	no	GO:0042552;GO:0005525;GO:0006446;GO:0005524;GO:0003743;GO:0005851;GO:0005085;GO:0051716;GO:0014003	myelination;GTP binding;regulation of translational initiation;ATP binding;translation initiation factor activity;eukaryotic translation initiation factor 2B complex;guanyl-nucleotide exchange factor activity;cellular response to stimulus;oligodendrocyte development	biological_process;molecular_function;biological_process;molecular_function;molecular_function;cellular_component;molecular_function;biological_process;biological_process	.	.	.
ENSONIG00000008520 : ENSONIG00000008520 : ENSONIP00000055672.1	ENSONIG00000008520	1.10275	no	up	0.00313668	yes	ENSONIP00000055672.1	0.98939	no	down	0.79306	no	GO:0000045;GO:0005829;GO:0070772;GO:0080025;GO:0034045;GO:0032266	autophagic vacuole assembly;cytosol;PAS complex;phosphatidylinositol-3,5-bisphosphate binding;pre-autophagosomal structure membrane;phosphatidylinositol-3-phosphate binding	biological_process;cellular_component;cellular_component;molecular_function;cellular_component;molecular_function	.	.	.
ENSONIG00000013081 : ENSONIG00000013081 : ENSONIP00000016453.2	ENSONIG00000013081	0.597089	no	down	0.0296425	yes	ENSONIP00000016453.2	0.93299	no	down	0.0147592	yes	GO:0005886;GO:0005391;GO:0005524;GO:0005794;GO:0016021;GO:0005783;GO:0006754;GO:0046872	plasma membrane;sodium:potassium-exchanging ATPase activity;ATP binding;Golgi apparatus;integral to membrane;endoplasmic reticulum;ATP biosynthetic process;metal ion binding	cellular_component;molecular_function;molecular_function;cellular_component;cellular_component;cellular_component;biological_process;molecular_function	ko04964;ko04260;ko04960	Proximal tubule bicarbonate reclamation;Cardiac muscle contraction;Aldosterone-regulated sodium reabsorption	Organismal Systems;Organismal Systems;Organismal Systems
ENSONIG00000019664 : ENSONIG00000019664 : ENSONIP00000024756.2	ENSONIG00000019664	1.15289	no	up	0.000349211	yes	ENSONIP00000024756.2	0.842445	no	down	0.00584723	yes	GO:0003723;GO:0000175;GO:0006364;GO:0000178;GO:0005829;GO:0005730;GO:0043928;GO:0005515	RNA binding;3'-5'-exoribonuclease activity;rRNA processing;exosome (RNase complex);cytosol;nucleolus;exonucleolytic nuclear-transcribed mRNA catabolic process involved in deadenylation-dependent decay;protein binding	molecular_function;molecular_function;biological_process;cellular_component;cellular_component;cellular_component;biological_process;molecular_function	.	.	.
ENSONIG00000018884 : ENSONIG00000018884 : ENSONIP00000023779.1	ENSONIG00000018884	1.14074	no	up	0.00490456	yes	ENSONIP00000023779.1	1.13068	no	up	0.0264674	yes	GO:0006357;GO:0007160;GO:0043123;GO:0005856;GO:0043149;GO:0007519;GO:0007266;GO:0033144;GO:0030334;GO:0000902;GO:0005634;GO:0005739;GO:0005886;GO:0043524;GO:0030521;GO:0005829;GO:0007229;GO:0005525;GO:0003924	regulation of transcription from RNA polymerase II promoter;cell-matrix adhesion;positive regulation of I-kappaB kinase/NF-kappaB cascade;cytoskeleton;stress fiber assembly;skeletal muscle tissue development;Rho protein signal transduction;negative regulation of steroid hormone receptor signaling pathway;regulation of cell migration;cell morphogenesis;nucleus;mitochondrion;plasma membrane;negativ…	biological_process;biological_process;biological_process;cellular_component;biological_process;biological_process;biological_process;biological_process;biological_process;biological_process;cellular_component;cellular_component;cellular_component;biological_process;biological_process;cellular_component;biological_process;molecular_function;molecular_function	ko04810;ko04144;ko04722;ko05210;ko04530;ko05100;ko04670;ko04510;ko04660;ko04310;ko05200;ko04520;ko04350;ko04270;ko04062;ko04360;ko05130	Regulation of actin cytoskeleton;Endocytosis;Neurotrophin signaling pathway;Colorectal cancer;Tight junction;Bacterial invasion of epithelial cells;Leukocyte transendothelial migration;Focal adhesion;T cell receptor signaling pathway;Wnt signaling pathway;Pathways in cancer;Adherens junction;TGF-beta signaling pathway;Vascular smooth muscle contraction;Chemokine signaling pathway;Axon guidance;Pa…	Cellular Processes;Cellular Processes;Organismal Systems;Human Diseases;Cellular Processes;Human Diseases;Organismal Systems;Cellular Processes;Organismal Systems;Environmental Information Processing;Human Diseases;Cellular Processes;Environmental Information Processing;Organismal Systems;Organismal Systems;Organismal Systems;Human Diseases
ENSONIG00000009318 : ENSONIG00000009318 : ENSONIP00000011714.1	ENSONIG00000009318	0.864653	no	down	0.357862	no	ENSONIP00000011714.1	0.91022	no	down	0.199413	no	GO:0005515;GO:0031307;GO:0016559;GO:0006915;GO:0000266;GO:0005779	protein binding;integral to mitochondrial outer membrane;peroxisome fission;apoptosis;mitochondrial fission;integral to peroxisomal membrane	molecular_function;cellular_component;biological_process;biological_process;biological_process;cellular_component	.	.	.
ENSONIG00000016167 : ENSONIG00000016167 : ENSONIP00000043711.1	ENSONIG00000016167	0.923805	no	down	0.838502	no	ENSONIP00000043711.1	0.974334	no	down	0.459365	no	GO:0009058;GO:0016021;GO:0004377	biosynthetic process;integral to membrane;glycolipid 2-alpha-mannosyltransferase activity	biological_process;cellular_component;molecular_function	ko00510	N-Glycan biosynthesis	Metabolism
ENSONIG00000005115 : ENSONIG00000005115 : ENSONIP00000006430.2	ENSONIG00000005115	1.01908	no	up	0.550213	no	ENSONIP00000006430.2	0.805597	yes	down	0.00796354	yes	GO:0006417;GO:0050689;GO:0030423;GO:0048471;GO:0035197;GO:0045070;GO:0030422;GO:0031047;GO:0046782;GO:0031054;GO:0003725;GO:0005737;GO:0016442;GO:0005634	regulation of translation;negative regulation of defense response to virus by host;targeting of mRNA for destruction involved in RNA interference;perinuclear region of cytoplasm;siRNA binding;positive regulation of viral genome replication;production of siRNA involved in RNA interference;gene silencing by RNA;regulation of viral transcription;pre-miRNA processing;double-stranded RNA binding;cytop…	biological_process;biological_process;biological_process;cellular_component;molecular_function;biological_process;biological_process;biological_process;biological_process;biological_process;molecular_function;cellular_component;cellular_component;cellular_component	.	.	.
ENSONIG00000002418 : ENSONIG00000002418 : ENSONIP00000003098.2	ENSONIG00000002418	0.818577	no	down	0.207236	no	ENSONIP00000003098.2	0.885292	no	down	0.0530477	no	GO:0004634;GO:0000287;GO:0006096;GO:0000015	phosphopyruvate hydratase activity;magnesium ion binding;glycolysis;phosphopyruvate hydratase complex	molecular_function;molecular_function;biological_process;cellular_component	ko00010;ko03018	Glycolysis / Gluconeogenesis;RNA degradation	Metabolism;Genetic Information Processing
ENSONIG00000017717 : ENSONIG00000017717 : ENSONIP00000022340.1	ENSONIG00000017717	0.957957	no	down	0.935432	no	ENSONIP00000022340.1	1.09021	no	up	0.258091	no	GO:0008430;GO:0004602;GO:0051289;GO:0005615;GO:0006979	selenium binding;glutathione peroxidase activity;protein homotetramerization;extracellular space;response to oxidative stress	molecular_function;molecular_function;biological_process;cellular_component;biological_process	ko00480;ko00590	Glutathione metabolism;Arachidonic acid metabolism	Metabolism;Metabolism
ENSONIG00000016855 : ENSONIG00000016855 : ENSONIP00000021239.1	ENSONIG00000016855	2.07356	yes	up	0.00401258	yes	ENSONIP00000021239.1	1.35849	yes	up	0.0675212	no	GO:0001503;GO:0045671;GO:0005615;GO:0048539	ossification;negative regulation of osteoclast differentiation;extracellular space;bone marrow development	biological_process;biological_process;cellular_component;biological_process	ko04360	Axon guidance	Organismal Systems
ENSONIG00000007531 : ENSONIG00000007531 : ENSONIP00000044896.1	ENSONIG00000007531	0.950899	no	down	0.988671	no	ENSONIP00000044896.1	1.04778	no	up	0.590302	no	GO:0046933;GO:0015986;GO:0005524;GO:0009790;GO:0006629;GO:0005886;GO:0046961;GO:0015991	hydrogen ion transporting ATP synthase activity, rotational mechanism;ATP synthesis coupled proton transport;ATP binding;embryo development;lipid metabolic process;plasma membrane;proton-transporting ATPase activity, rotational mechanism;ATP hydrolysis coupled proton transport	molecular_function;biological_process;molecular_function;biological_process;biological_process;cellular_component;molecular_function;biological_process	ko05010;ko05016;ko00190;ko05012	Alzheimer's disease;Huntington's disease;Oxidative phosphorylation;Parkinson's disease	Human Diseases;Human Diseases;Metabolism;Human Diseases
ENSONIG00000016031 : ENSONIG00000016031 : ENSONIP00000020194.2	ENSONIG00000016031	0.983194	no	down	0.523859	no	ENSONIP00000020194.2	0.951854	no	down	0.241872	no	.	.	.	ko04111;ko04110	Cell cycle - yeast;Cell cycle	Cellular Processes;Cellular Processes
ENSONIG00000015275 : ENSONIG00000015275 : ENSONIP00000019221.2	ENSONIG00000015275	0.921614	no	down	0.623264	no	ENSONIP00000019221.2	0.902663	no	down	0.353274	no	GO:0005739;GO:0016787	mitochondrion;hydrolase activity	cellular_component;molecular_function	.	.	.
ENSONIG00000019938 : ENSONIG00000019938 : ENSONIP00000034495.1	ENSONIG00000019938	0.520204	no	down	9.71713e-15	yes	ENSONIP00000034495.1	0.993686	no	down	0.89424	no	GO:0046872	metal ion binding	molecular_function	ko05416;ko04530	Viral myocarditis;Tight junction	Human Diseases;Cellular Processes
ENSONIG00000002394 : ENSONIG00000002394 : ENSONIP00000030719.1	ENSONIG00000002394	0.43718	yes	down	1.42629e-14	yes	ENSONIP00000030719.1	1.23547	yes	up	0.1253	no	GO:0030247;GO:0005044;GO:0006955;GO:0005737;GO:0043236;GO:0004197;GO:0006508	polysaccharide binding;scavenger receptor activity;immune response;cytoplasm;laminin binding;cysteine-type endopeptidase activity;proteolysis	molecular_function;molecular_function;biological_process;cellular_component;molecular_function;molecular_function;biological_process	ko04142;ko04612	Lysosome;Antigen processing and presentation	Cellular Processes;Organismal Systems
ENSONIG00000011799 : ENSONIG00000011799 : ENSONIP00000040981.1	ENSONIG00000011799	1.02064	no	up	0.201735	no	ENSONIP00000040981.1	0.851018	no	down	0.140686	no	GO:0015030;GO:0005681;GO:0005737;GO:0003723;GO:0007528;GO:0006397;GO:0008380	Cajal body;spliceosomal complex;cytoplasm;RNA binding;neuromuscular junction development;mRNA processing;RNA splicing	cellular_component;cellular_component;cellular_component;molecular_function;biological_process;biological_process;biological_process	.	.	.
ENSONIG00000018994 : ENSONIG00000018994 : ENSONIP00000023915.2	ENSONIG00000018994	1.2063	no	up	0.0274593	yes	ENSONIP00000023915.2	0.948685	no	down	0.13813	no	GO:0005576	extracellular region	cellular_component	.	.	.
ENSONIG00000009687 : ENSONIG00000009687 : ENSONIP00000012167.1	ENSONIG00000009687	1282.09	yes	up	1	no	ENSONIP00000012167.1	0.942376	no	down	0.236579	no	GO:0005515;GO:0005737;GO:0005525;GO:0007018;GO:0051258;GO:0003924;GO:0051084;GO:0005198;GO:0005874	protein binding;cytoplasm;GTP binding;microtubule-based movement;protein polymerization;GTPase activity;'de novo' posttranslational protein folding;structural molecule activity;microtubule	molecular_function;cellular_component;molecular_function;biological_process;biological_process;molecular_function;biological_process;molecular_function;cellular_component	ko05130;ko04540;ko04145	Pathogenic Escherichia coli infection;Gap junction;Phagosome	Human Diseases;Cellular Processes;Cellular Processes
ENSONIG00000018799 : ENSONIG00000018799 : ENSONIP00000023668.1	ENSONIG00000018799	0.971361	no	down	0.851736	no	ENSONIP00000023668.1	0.951854	no	down	0.315473	no	GO:0016021	integral to membrane	cellular_component	.	.	.
ENSONIG00000000474 : ENSONIG00000000474 : ENSONIP00000000606.1	ENSONIG00000000474	1.17375	no	up	0.0208342	yes	ENSONIP00000000606.1	1.04082	no	up	0.464226	no	GO:0007219;GO:0046922;GO:0006004;GO:0005783	Notch signaling pathway;peptide-O-fucosyltransferase activity;fucose metabolic process;endoplasmic reticulum	biological_process;molecular_function;biological_process;cellular_component	.	.	.
ENSONIG00000000390 : ENSONIG00000000390 : ENSONIP00000047565.1	ENSONIG00000000390	1.07474	no	up	0.473236	no	ENSONIP00000047565.1	0.957273	no	down	0.584842	no	GO:0016656;GO:0006805;GO:0005829;GO:0004364	monodehydroascorbate reductase (NADH) activity;xenobiotic metabolic process;cytosol;glutathione transferase activity	molecular_function;biological_process;cellular_component;molecular_function	.	.	.
ENSONIG00000000251 : ENSONIG00000000251 : ENSONIP00000000321.1	ENSONIG00000000251	1.0574	no	up	0.112334	no	ENSONIP00000000321.1	0.998002	no	down	0.970286	no	GO:0005737	cytoplasm	cellular_component	.	.	.
ENSONIG00000006574 : ENSONIG00000006574 : ENSONIP00000008297.2	ENSONIG00000006574	1.43767	no	up	5.644e-14	yes	ENSONIP00000008297.2	0.907184	no	down	0.254442	no	GO:0003723;GO:0071339;GO:0005681;GO:0008380;GO:0060041;GO:0006397	RNA binding;MLL1 complex;spliceosomal complex;RNA splicing;retina development in camera-type eye;mRNA processing	molecular_function;cellular_component;cellular_component;biological_process;biological_process;biological_process	.	.	.
ENSONIG00000019386 : ENSONIG00000019386 : ENSONIP00000064315.1	ENSONIG00000019386	2.23227	yes	up	7.41558e-28	yes	ENSONIP00000064315.1	1.02566	no	up	0.68815	no	GO:0005488	binding	molecular_function	.	.	.
ENSONIG00000013837 : ENSONIG00000013837 : ENSONIP00000079309.1	ENSONIG00000013837	1.02081	no	up	0.311959	no	ENSONIP00000079309.1	0.943005	no	down	0.23785	no	GO:0001701;GO:0005515;GO:0019209;GO:0003007;GO:0030324;GO:0000185;GO:0007179;GO:0003824	in utero embryonic development;protein binding;kinase activator activity;heart morphogenesis;lung development;activation of MAPKKK activity;transforming growth factor beta receptor signaling pathway;catalytic activity	biological_process;molecular_function;molecular_function;biological_process;biological_process;biological_process;biological_process;molecular_function	ko04621;ko04620;ko05140;ko04010	NOD-like receptor signaling pathway;Toll-like receptor signaling pathway;Leishmaniasis;MAPK signaling pathway	Organismal Systems;Organismal Systems;Human Diseases;Environmental Information Processing
ENSONIG00000002893 : ENSONIG00000002893 : ENSONIP00000003622.1	ENSONIG00000002893	1.10977	no	up	0.0200139	yes	ENSONIP00000003622.1	0.870012	no	down	0.00606707	yes	GO:0008270;GO:0018342;GO:0004663	zinc ion binding;protein prenylation;Rab geranylgeranyltransferase activity	molecular_function;biological_process;molecular_function	.	.	.
ENSONIG00000012693 : ENSONIG00000012693 : ENSONIP00000053383.1	ENSONIG00000012693	1.05516	no	up	0.0604351	no	ENSONIP00000053383.1	0.905654	no	down	0.113439	no	.	.	.	.	.	.
ENSONIG00000015098 : ENSONIG00000015098 : ENSONIP00000019002.2	ENSONIG00000015098	1.0375	no	up	0.120218	no	ENSONIP00000019002.2	0.854714	no	down	0.0864718	no	GO:0007049;GO:0006260;GO:0005634;GO:0051103;GO:0051301;GO:0003677;GO:0046872;GO:0003910;GO:0006310;GO:0005524	cell cycle;DNA replication;nucleus;DNA ligation involved in DNA repair;cell division;DNA binding;metal ion binding;DNA ligase (ATP) activity;DNA recombination;ATP binding	biological_process;biological_process;cellular_component;biological_process;biological_process;molecular_function;molecular_function;molecular_function;biological_process;molecular_function	ko03420;ko03030;ko03410;ko03430	Nucleotide excision repair;DNA replication;Base excision repair;Mismatch repair	Genetic Information Processing;Genetic Information Processing;Genetic Information Processing;Genetic Information Processing
ENSONIG00000013603 : ENSONIG00000013603 : ENSONIP00000079565.1	ENSONIG00000013603	0.966242	no	down	0.906236	no	ENSONIP00000079565.1	1.37961	yes	up	0.38661	no	GO:0006402;GO:0003723;GO:0005515;GO:0035278;GO:0000932;GO:0005829	mRNA catabolic process;RNA binding;protein binding;negative regulation of translation involved in gene silencing by miRNA;cytoplasmic mRNA processing body;cytosol	biological_process;molecular_function;molecular_function;biological_process;cellular_component;cellular_component	.	.	.
ENSONIG00000003636 : ENSONIG00000003636 : ENSONIP00000004575.2	ENSONIG00000003636	0.426534	yes	down	0.0284412	yes	ENSONIP00000004575.2	1.13028	no	up	0.0914665	no	GO:0006164;GO:0006196;GO:0009986;GO:0000166;GO:0016021;GO:0010044;GO:0005886;GO:0007420;GO:0097060;GO:0008198;GO:0008253;GO:0031225;GO:0046889	purine nucleotide biosynthetic process;AMP catabolic process;cell surface;nucleotide binding;integral to membrane;response to aluminum ion;plasma membrane;brain development;synaptic membrane;ferrous iron binding;5'-nucleotidase activity;anchored to membrane;positive regulation of lipid biosynthetic process	biological_process;biological_process;cellular_component;molecular_function;cellular_component;biological_process;cellular_component;biological_process;cellular_component;molecular_function;molecular_function;cellular_component;biological_process	ko00760;ko00230;ko00240	Nicotinate and nicotinamide metabolism;Purine metabolism;Pyrimidine metabolism	Metabolism;Metabolism;Metabolism
ENSONIG00000004714 : ENSONIG00000004714 : ENSONIP00000005937.2	ENSONIG00000004714	0.851043	no	down	0.0553183	no	ENSONIP00000005937.2	0.914486	no	down	0.551415	no	GO:0016020;GO:0006986;GO:0005788;GO:0004571;GO:0005509	membrane;response to unfolded protein;endoplasmic reticulum lumen;mannosyl-oligosaccharide 1,2-alpha-mannosidase activity;calcium ion binding	cellular_component;biological_process;cellular_component;molecular_function;molecular_function	.	.	.
ENSONIG00000009935 : ENSONIG00000009935 : ENSONIP00000064650.1	ENSONIG00000009935	0.862246	no	down	0.458478	no	ENSONIP00000064650.1	1.1398	no	up	0.0222466	yes	GO:0046459;GO:0006637;GO:0005777;GO:0043648;GO:0006104;GO:0016290	short-chain fatty acid metabolic process;acyl-CoA metabolic process;peroxisome;dicarboxylic acid metabolic process;succinyl-CoA metabolic process;palmitoyl-CoA hydrolase activity	biological_process;biological_process;cellular_component;biological_process;biological_process;molecular_function	ko01040	Biosynthesis of unsaturated fatty acids	Metabolism
ENSONIG00000000397 : ENSONIG00000000397 : ENSONIP00000000502.2	ENSONIG00000000397	1.34602	no	up	0.00138904	yes	ENSONIP00000000502.2	1.01647	no	up	0.732768	no	GO:0005887;GO:0005604;GO:0005911;GO:0031581;GO:0007160;GO:0008544;GO:0005581;GO:0005515;GO:0030056	integral to plasma membrane;basement membrane;cell-cell junction;hemidesmosome assembly;cell-matrix adhesion;epidermis development;collagen;protein binding;hemidesmosome	cellular_component;cellular_component;cellular_component;biological_process;biological_process;biological_process;cellular_component;molecular_function;cellular_component	.	.	.
ENSONIG00000017848 : ENSONIG00000017848 : ENSONIP00000022500.1	ENSONIG00000017848	1.15995	no	up	0.0060967	yes	ENSONIP00000022500.1	0.953451	no	down	0.0728793	no	GO:0006979;GO:0006810;GO:0009055;GO:0008137;GO:0022900	response to oxidative stress;transport;electron carrier activity;NADH dehydrogenase (ubiquinone) activity;electron transport chain	biological_process;biological_process;molecular_function;molecular_function;biological_process	.	.	.
ENSONIG00000012175 : ENSONIG00000012175 : ENSONIP00000062803.1	ENSONIG00000012175	0.973563	no	down	0.72703	no	ENSONIP00000062803.1	1.02497	no	up	0.612396	no	GO:0008237;GO:0004177;GO:0008270;GO:0005737;GO:0003725;GO:0006508	metallopeptidase activity;aminopeptidase activity;zinc ion binding;cytoplasm;double-stranded RNA binding;proteolysis	molecular_function;molecular_function;molecular_function;cellular_component;molecular_function;biological_process	.	.	.
ENSONIG00000008372 : ENSONIG00000008372 : ENSONIP00000036023.1	ENSONIG00000008372	0.614422	no	down	1.79464e-05	yes	ENSONIP00000036023.1	0.943959	no	down	0.192507	no	.	.	.	ko04530;ko05416	Tight junction;Viral myocarditis	Cellular Processes;Human Diseases
ENSONIG00000014195 : ENSONIG00000014195 : ENSONIP00000017842.2	ENSONIG00000014195	0.600151	no	down	1.59266e-05	yes	ENSONIP00000017842.2	0.715266	yes	down	0.00444878	yes	GO:0035091;GO:0005524;GO:0006950;GO:0004674;GO:0007154;GO:0005769;GO:0016023	phosphatidylinositol binding;ATP binding;response to stress;protein serine/threonine kinase activity;cell communication;early endosome;cytoplasmic membrane-bounded vesicle	molecular_function;molecular_function;biological_process;molecular_function;biological_process;cellular_component;cellular_component	.	.	.
ENSONIG00000007248 : ENSONIG00000007248 : ENSONIP00000009139.2	ENSONIG00000007248	1.06472	no	up	0.0537004	no	ENSONIP00000009139.2	0.831502	yes	down	0.00532635	yes	.	.	.	.	.	.
ENSONIG00000001247 : ENSONIG00000001247 : ENSONIP00000044548.1	ENSONIG00000001247	0.942849	no	down	0.883647	no	ENSONIP00000044548.1	1.05761	no	up	0.195528	no	GO:0004174;GO:0022900;GO:0005743;GO:0043783;GO:0051539;GO:0006979;GO:0046872;GO:0048039;GO:0009055;GO:0006810;GO:0050660	electron-transferring-flavoprotein dehydrogenase activity;electron transport chain;mitochondrial inner membrane;oxidoreductase activity, oxidizing metal ions with flavin as acceptor;4 iron, 4 sulfur cluster binding;response to oxidative stress;metal ion binding;ubiquinone binding;electron carrier activity;transport;flavin adenine dinucleotide binding	molecular_function;biological_process;cellular_component;molecular_function;molecular_function;biological_process;molecular_function;molecular_function;molecular_function;biological_process;molecular_function	.	.	.
ENSONIG00000014829 : ENSONIG00000014829 : ENSONIP00000053587.1	ENSONIG00000014829	1.74334	no	up	3.66693e-24	yes	ENSONIP00000053587.1	0.818182	yes	down	0.00164573	yes	GO:0005829;GO:0005515;GO:0007596;GO:0005741;GO:0005783;GO:0003723;GO:0016021	cytosol;protein binding;blood coagulation;mitochondrial outer membrane;endoplasmic reticulum;RNA binding;integral to membrane	cellular_component;molecular_function;biological_process;cellular_component;cellular_component;molecular_function;cellular_component	.	.	.
ENSONIG00000003090 : ENSONIG00000003090 : ENSONIP00000003869.1	ENSONIG00000003090	1.03627	no	up	0.125193	no	ENSONIP00000003869.1	0.81653	yes	down	0.0555701	no	GO:0005737;GO:0005634;GO:0008289;GO:0005215	cytoplasm;nucleus;lipid binding;transporter activity	cellular_component;cellular_component;molecular_function;molecular_function	ko03320	PPAR signaling pathway	Organismal Systems
ENSONIG00000007182 : ENSONIG00000007182 : ENSONIP00000040485.1	ENSONIG00000007182	1.00909	no	up	0.500755	no	ENSONIP00000040485.1	0.865941	no	down	0.0849916	no	GO:0005737;GO:0003779;GO:0005856;GO:0005925	cytoplasm;actin binding;cytoskeleton;focal adhesion	cellular_component;molecular_function;cellular_component;cellular_component	ko05110	Vibrio cholerae infection	Human Diseases
ENSONIG00000017427 : ENSONIG00000017427 : ENSONIP00000021979.2	ENSONIG00000017427	0.818919	no	down	0.0553468	no	ENSONIP00000021979.2	1.01207	no	up	0.871934	no	GO:0005856;GO:0006909;GO:0005096;GO:0009615;GO:0050688	cytoskeleton;phagocytosis;GTPase activator activity;response to virus;regulation of defense response to virus	cellular_component;biological_process;molecular_function;biological_process;biological_process	ko03320;ko05016	PPAR signaling pathway;Huntington's disease	Organismal Systems;Human Diseases
ENSONIG00000017702 : ENSONIG00000017702 : ENSONIP00000022322.2	ENSONIG00000017702	1.06914	no	up	0.0298024	yes	ENSONIP00000022322.2	0.997669	no	down	0.921188	no	GO:0043297;GO:0015629;GO:0008013;GO:0042692;GO:0007155;GO:0016342;GO:0005829;GO:0071681;GO:0045295;GO:0034332;GO:0005198;GO:0045296;GO:0051149;GO:0017166	apical junction assembly;actin cytoskeleton;beta-catenin binding;muscle cell differentiation;cell adhesion;catenin complex;cytosol;cellular response to indole-3-methanol;gamma-catenin binding;adherens junction organization;structural molecule activity;cadherin binding;positive regulation of muscle cell differentiation;vinculin binding	biological_process;cellular_component;molecular_function;biological_process;biological_process;cellular_component;cellular_component;biological_process;molecular_function;biological_process;molecular_function;molecular_function;biological_process;molecular_function	ko05213;ko04670;ko04520;ko05412;ko05200;ko05100;ko04530	Endometrial cancer;Leukocyte transendothelial migration;Adherens junction;Arrhythmogenic right ventricular cardiomyopathy (ARVC;Pathways in cancer;Bacterial invasion of epithelial cells;Tight junction	Human Diseases;Organismal Systems;Cellular Processes;Human Diseases;Human Diseases;Human Diseases;Cellular Processes
ENSONIG00000017455 : ENSONIG00000017455 : ENSONIP00000065829.1	ENSONIG00000017455	1.02739	no	up	0.121297	no	ENSONIP00000065829.1	0.98939	no	down	0.820051	no	GO:0048280;GO:0008565;GO:0000139;GO:0005515;GO:0005488;GO:0006886;GO:0005792;GO:0048471;GO:0005829	vesicle fusion with Golgi apparatus;protein transporter activity;Golgi membrane;protein binding;binding;intracellular protein transport;microsome;perinuclear region of cytoplasm;cytosol	biological_process;molecular_function;cellular_component;molecular_function;molecular_function;biological_process;cellular_component;cellular_component;cellular_component	ko04530;ko05416	Tight junction;Viral myocarditis	Cellular Processes;Human Diseases
ENSONIG00000002093 : ENSONIG00000002093 : ENSONIP00000037557.1	ENSONIG00000002093	1.71559	no	up	9.49121e-09	yes	ENSONIP00000037557.1	1.02703	no	up	0.409819	no	GO:0045576;GO:0005634;GO:0048793;GO:0032287;GO:0005737	mast cell activation;nucleus;pronephros development;peripheral nervous system myelin maintenance;cytoplasm	biological_process;cellular_component;biological_process;biological_process;cellular_component	.	.	.
ENSONIG00000010497 : ENSONIG00000010497 : ENSONIP00000069299.1	ENSONIG00000010497	0.852507	no	down	0.0981439	no	ENSONIP00000069299.1	0.864512	no	down	0.0157879	yes	.	.	.	.	.	.
ENSONIG00000018463 : ENSONIG00000018463 : ENSONIP00000023244.2	ENSONIG00000018463	1.23494	no	up	0.156941	no	ENSONIP00000023244.2	0.896933	no	down	0.149098	no	.	.	.	.	.	.
ENSONIG00000005604 : ENSONIG00000005604 : ENSONIP00000007053.2	ENSONIG00000005604	0.979702	no	down	0.670405	no	ENSONIP00000007053.2	0.981506	no	down	0.807122	no	GO:0016021	integral to membrane	cellular_component	.	.	.
ENSONIG00000003702 : ENSONIG00000003702 : ENSONIP00000035227.1	ENSONIG00000003702	1.0716	no	up	0.364993	no	ENSONIP00000035227.1	1.08478	no	up	0.40851	no	GO:0042470;GO:0007275;GO:0007160;GO:0007229;GO:0008305;GO:0005488;GO:0004872	melanosome;multicellular organismal development;cell-matrix adhesion;integrin-mediated signaling pathway;integrin complex;binding;receptor activity	cellular_component;biological_process;biological_process;biological_process;cellular_component;molecular_function;molecular_function	ko05130;ko05410;ko04360;ko04145;ko05222;ko05131;ko04512;ko05200;ko05140;ko05414;ko05412;ko04510;ko04670;ko05100;ko04810;ko04514	Pathogenic Escherichia coli infection;Hypertrophic cardiomyopathy (HCM;Axon guidance;Phagosome;Small cell lung cancer;Shigellosis;ECM-receptor interaction;Pathways in cancer;Leishmaniasis;Dilated cardiomyopathy;Arrhythmogenic right ventricular cardiomyopathy (ARVC;Focal adhesion;Leukocyte transendothelial migration;Bacterial invasion of epithelial cells;Regulation of actin cytoskeleton;Cell adhes…	Human Diseases;Human Diseases;Organismal Systems;Cellular Processes;Human Diseases;Human Diseases;Environmental Information Processing;Human Diseases;Human Diseases;Human Diseases;Human Diseases;Cellular Processes;Organismal Systems;Human Diseases;Cellular Processes;Environmental Information Processing
ENSONIG00000012961 : ENSONIG00000012961 : ENSONIP00000016304.1	ENSONIG00000012961	0.36048	yes	down	0.00212324	yes	ENSONIP00000016304.1	0.853877	no	down	0.188465	no	GO:0005215;GO:0008289;GO:0005737	transporter activity;lipid binding;cytoplasm	molecular_function;molecular_function;cellular_component	ko03320	PPAR signaling pathway	Organismal Systems
ENSONIG00000011150 : ENSONIG00000011150 : ENSONIP00000074289.1	ENSONIG00000011150	0.975906	no	down	0.600059	no	ENSONIP00000074289.1	0.896933	no	down	0.0373519	yes	GO:0019900;GO:0046872;GO:0005737;GO:0046777;GO:0035329;GO:0019209;GO:0005634	kinase binding;metal ion binding;cytoplasm;protein autophosphorylation;hippo signaling cascade;kinase activator activity;nucleus	molecular_function;molecular_function;cellular_component;biological_process;biological_process;molecular_function;cellular_component	ko04111	Cell cycle - yeast	Cellular Processes
ENSONIG00000015481 : ENSONIG00000015481 : ENSONIP00000019483.2	ENSONIG00000015481	0.887819	no	down	0.166736	no	ENSONIP00000019483.2	0.840491	no	down	0.0461785	yes	GO:0055038;GO:0015031;GO:0016021;GO:0005802	recycling endosome membrane;protein transport;integral to membrane;trans-Golgi network	cellular_component;biological_process;cellular_component;cellular_component	.	.	.
ENSONIG00000007379 : ENSONIG00000007379 : ENSONIP00000044065.1	ENSONIG00000007379	1.17408	no	up	4.58723e-05	yes	ENSONIP00000044065.1	0.990381	no	down	0.843526	no	GO:0047150;GO:0005737;GO:0008898;GO:0008270;GO:0009086	betaine-homocysteine S-methyltransferase activity;cytoplasm;homocysteine S-methyltransferase activity;zinc ion binding;methionine biosynthetic process	molecular_function;cellular_component;molecular_function;molecular_function;biological_process	ko00270;ko00260	Cysteine and methionine metabolism;Glycine, serine and threonine metabolism	Metabolism;Metabolism
ENSONIG00000004627 : ENSONIG00000004627 : ENSONIP00000005827.2	ENSONIG00000004627	0.83253	no	down	0.0265222	yes	ENSONIP00000005827.2	1.0608	no	up	0.0243044	yes	GO:0006915;GO:0005737;GO:0006909	apoptosis;cytoplasm;phagocytosis	biological_process;cellular_component;biological_process	.	.	.
ENSONIG00000008211 : ENSONIG00000008211 : ENSONIP00000010336.2	ENSONIG00000008211	2.76011	yes	up	1	no	ENSONIP00000010336.2	1.04463	no	up	0.395366	no	GO:0005524;GO:0032088;GO:0007249;GO:0005737;GO:0042110	ATP binding;negative regulation of NF-kappaB transcription factor activity;I-kappaB kinase/NF-kappaB cascade;cytoplasm;T cell activation	molecular_function;biological_process;biological_process;cellular_component;biological_process	ko00590;ko00430;ko00480;ko00460;ko00450	Arachidonic acid metabolism;Taurine and hypotaurine metabolism;Glutathione metabolism;Cyanoamino acid metabolism;Selenoamino acid metabolism	Metabolism;Metabolism;Metabolism;Metabolism;Metabolism
ENSONIG00000002481 : ENSONIG00000002481 : ENSONIP00000031086.1	ENSONIG00000002481	0.861066	no	down	0.296441	no	ENSONIP00000031086.1	0.829573	yes	down	0.372638	no	GO:0003677;GO:0003700;GO:0005634;GO:0005737	DNA binding;sequence-specific DNA binding transcription factor activity;nucleus;cytoplasm	molecular_function;molecular_function;cellular_component;cellular_component	ko04360;ko04370;ko04662;ko04650;ko04660;ko04310	Axon guidance;VEGF signaling pathway;B cell receptor signaling pathway;Natural killer cell mediated cytotoxicity;T cell receptor signaling pathway;Wnt signaling pathway	Organismal Systems;Environmental Information Processing;Organismal Systems;Organismal Systems;Organismal Systems;Environmental Information Processing
ENSONIG00000001096 : ENSONIG00000001096 : ENSONIP00000036976.1	ENSONIG00000001096	0.83372	no	down	0.431153	no	ENSONIP00000036976.1	1.01039	no	up	0.753462	no	GO:0070935;GO:0005654;GO:0005515;GO:0005829;GO:0007275;GO:0000166	3'-UTR-mediated mRNA stabilization;nucleoplasm;protein binding;cytosol;multicellular organismal development;nucleotide binding	biological_process;cellular_component;molecular_function;cellular_component;biological_process;molecular_function	.	.	.
ENSONIG00000015719 : ENSONIG00000015719 : ENSONIP00000042326.1	ENSONIG00000015719	1.15302	no	up	0.000446516	yes	ENSONIP00000042326.1	0.815431	yes	down	0.000964413	yes	GO:0008184;GO:0005980	glycogen phosphorylase activity;glycogen catabolic process	molecular_function;biological_process	ko04910;ko00500	Insulin signaling pathway;Starch and sucrose metabolism	Organismal Systems;Metabolism
ENSONIG00000012829 : ENSONIG00000012829 : ENSONIP00000016144.1	ENSONIG00000012829	0.455667	yes	down	7.11999e-05	yes	ENSONIP00000016144.1	0.802885	yes	down	0.0342687	yes	GO:0005795;GO:0007165	Golgi stack;signal transduction	cellular_component;biological_process	.	.	.
ENSONIG00000001316 : ENSONIG00000001316 : ENSONIP00000079472.1	ENSONIG00000001316	0.896891	no	down	0.28414	no	ENSONIP00000079472.1	0.973684	no	down	0.483828	no	GO:0005576;GO:0002576;GO:0015031;GO:0001882;GO:0051271;GO:0031143;GO:0051017;GO:0051015;GO:0005730;GO:0030863;GO:0001725;GO:0043234;GO:0030529;GO:0051272;GO:0005178;GO:0030168;GO:0031093;GO:0042803;GO:0032417;GO:0048471;GO:0005509;GO:0042981;GO:0048549	extracellular region;platelet degranulation;protein transport;nucleoside binding;negative regulation of cellular component movement;pseudopodium;actin filament bundle assembly;actin filament binding;nucleolus;cortical cytoskeleton;stress fiber;protein complex;ribonucleoprotein complex;positive regulation of cellular component movement;integrin binding;platelet activation;platelet alpha granule lu…	cellular_component;biological_process;biological_process;molecular_function;biological_process;cellular_component;biological_process;molecular_function;cellular_component;cellular_component;cellular_component;cellular_component;cellular_component;biological_process;molecular_function;biological_process;cellular_component;molecular_function;biological_process;cellular_component;molecular_function;…	ko04520;ko04670;ko04810;ko04510;ko05412;ko05322;ko04530	Adherens junction;Leukocyte transendothelial migration;Regulation of actin cytoskeleton;Focal adhesion;Arrhythmogenic right ventricular cardiomyopathy (ARVC;Systemic lupus erythematosus;Tight junction	Cellular Processes;Organismal Systems;Cellular Processes;Cellular Processes;Human Diseases;Human Diseases;Cellular Processes
ENSONIG00000020323 : ENSONIG00000020323 : ENSONIP00000060501.1	ENSONIG00000020323	0.732436	no	down	5.63014e-07	yes	ENSONIP00000060501.1	1.08551	no	up	0.102036	no	GO:0005634;GO:0005737	nucleus;cytoplasm	cellular_component;cellular_component	ko03022	Basal transcription factors	Genetic Information Processing
ENSONIG00000004373 : ENSONIG00000004373 : ENSONIP00000028360.1	ENSONIG00000004373	1.05329	no	up	0.121264	no	ENSONIP00000028360.1	0.942071	no	down	0.0778048	no	GO:0009792;GO:0007126;GO:0040011;GO:0005524;GO:0007281;GO:0008340;GO:0040035;GO:0031625;GO:0040007;GO:0002119;GO:0042787;GO:0004842	embryo development ending in birth or egg hatching;meiosis;locomotion;ATP binding;germ cell development;determination of adult lifespan;hermaphrodite genitalia development;ubiquitin protein ligase binding;growth;nematode larval development;protein ubiquitination involved in ubiquitin-dependent protein catabolic process;ubiquitin-protein ligase activity	biological_process;biological_process;biological_process;molecular_function;biological_process;biological_process;biological_process;molecular_function;biological_process;biological_process;biological_process;molecular_function	ko04120	Ubiquitin mediated proteolysis	Genetic Information Processing
ENSONIG00000018919 : ENSONIG00000018919 : ENSONIP00000023825.2	ENSONIG00000018919	0.487826	yes	down	0.011553	yes	ENSONIP00000023825.2	0.777547	yes	down	0.0455527	yes	GO:0005769;GO:0005829;GO:0006886;GO:0016020	early endosome;cytosol;intracellular protein transport;membrane	cellular_component;cellular_component;biological_process;cellular_component	ko04142	Lysosome	Cellular Processes
ENSONIG00000019003 : ENSONIG00000019003 : ENSONIP00000044089.1	ENSONIG00000019003	0.963962	no	down	0.812486	no	ENSONIP00000044089.1	0.926485	no	down	0.0206103	yes	GO:0006511;GO:0016579;GO:0004843;GO:0004197;GO:0004221	ubiquitin-dependent protein catabolic process;protein deubiquitination;ubiquitin-specific protease activity;cysteine-type endopeptidase activity;ubiquitin thiolesterase activity	biological_process;biological_process;molecular_function;molecular_function;molecular_function	.	.	.
ENSONIG00000011723 : ENSONIG00000011723 : ENSONIP00000014764.2	ENSONIG00000011723	1.04212	no	up	0.100625	no	ENSONIP00000014764.2	0.98544	no	down	0.782956	no	GO:0035050;GO:0055008;GO:0005634;GO:0045199;GO:0001917;GO:0016324;GO:0008078;GO:0016337;GO:0021744;GO:0001841;GO:0005923;GO:0002011;GO:0045176;GO:0031226;GO:0016332;GO:0060059	embryonic heart tube development;cardiac muscle tissue morphogenesis;nucleus;maintenance of epithelial cell apical/basal polarity;photoreceptor inner segment;apical plasma membrane;mesodermal cell migration;cell-cell adhesion;dorsal motor nucleus of vagus nerve development;neural tube formation;tight junction;morphogenesis of an epithelial sheet;apical protein localization;intrinsic to plasma mem…	biological_process;biological_process;cellular_component;biological_process;cellular_component;cellular_component;biological_process;biological_process;biological_process;biological_process;cellular_component;biological_process;biological_process;cellular_component;biological_process;biological_process	ko04530	Tight junction	Cellular Processes
ENSONIG00000007336 : ENSONIG00000007336 : ENSONIP00000009253.1	ENSONIG00000007336	0.816756	no	down	0.00629037	yes	ENSONIP00000009253.1	0.961111	no	down	0.196947	no	GO:0005622;GO:0005097	intracellular;Rab GTPase activator activity	cellular_component;molecular_function	.	.	.
ENSONIG00000011324 : ENSONIG00000011324 : ENSONIP00000014252.1	ENSONIG00000011324	0.905018	no	down	0.72153	no	ENSONIP00000014252.1	0.917546	no	down	0.186489	no	GO:0046983;GO:0003677;GO:0006950;GO:0008285;GO:0046872;GO:0007165	protein dimerization activity;DNA binding;response to stress;negative regulation of cell proliferation;metal ion binding;signal transduction	molecular_function;molecular_function;biological_process;biological_process;molecular_function;biological_process	.	.	.
ENSONIG00000006060 : ENSONIG00000006060 : ENSONIP00000007632.2	ENSONIG00000006060	0.849647	no	down	0.634805	no	ENSONIP00000007632.2	0.934537	no	down	0.434663	no	GO:0005887;GO:0005537;GO:0006898;GO:0004872;GO:0010008	integral to plasma membrane;mannose binding;receptor-mediated endocytosis;receptor activity;endosome membrane	cellular_component;molecular_function;biological_process;molecular_function;cellular_component	ko04145	Phagosome	Cellular Processes
ENSONIG00000012780 : ENSONIG00000012780 : ENSONIP00000016088.1	ENSONIG00000012780	3.82335	yes	up	1	no	ENSONIP00000016088.1	1.21611	yes	up	0.118843	no	GO:0006957;GO:0006958;GO:0005579;GO:0005576;GO:0019835	complement activation, alternative pathway;complement activation, classical pathway;membrane attack complex;extracellular region;cytolysis	biological_process;biological_process;cellular_component;cellular_component;biological_process	ko05322;ko04610;ko05020	Systemic lupus erythematosus;Complement and coagulation cascades;Prion diseases	Human Diseases;Organismal Systems;Human Diseases
ENSONIG00000011084 : ENSONIG00000011084 : ENSONIP00000013953.2	ENSONIG00000011084	0.728272	no	down	0.0347894	yes	ENSONIP00000013953.2	0.911118	no	down	0.137782	no	GO:0005515;GO:0030056;GO:0006605	protein binding;hemidesmosome;protein targeting	molecular_function;cellular_component;biological_process	ko00230;ko04113	Purine metabolism;Meiosis - yeast	Metabolism;Cellular Processes
ENSONIG00000007961 : ENSONIG00000007961 : ENSONIP00000044776.1	ENSONIG00000007961	1.03767	no	up	0.0958472	no	ENSONIP00000044776.1	0.931445	no	down	0.375551	no	GO:0010891;GO:0005811;GO:0006631;GO:0003841;GO:0006654;GO:0030154;GO:0010898;GO:0005829	negative regulation of sequestering of triglyceride;lipid particle;fatty acid metabolic process;1-acylglycerol-3-phosphate O-acyltransferase activity;phosphatidic acid biosynthetic process;cell differentiation;positive regulation of triglyceride catabolic process;cytosol	biological_process;cellular_component;biological_process;molecular_function;biological_process;biological_process;biological_process;cellular_component	.	.	.
ENSONIG00000003332 : ENSONIG00000003332 : ENSONIP00000004194.2	ENSONIG00000003332	1.12064	no	up	0.00339121	yes	ENSONIP00000004194.2	0.936431	no	down	0.328904	no	GO:0051436;GO:0051437;GO:0006977;GO:0070628;GO:0000216;GO:0004221;GO:0002474;GO:0006915;GO:0031145;GO:0000502;GO:0005654;GO:0016071;GO:0016032;GO:0005829;GO:0070536;GO:0061133;GO:0000084;GO:0046872;GO:0042981;GO:0061136;GO:0008237;GO:0000209;GO:0000082;GO:0006521	negative regulation of ubiquitin-protein ligase activity involved in mitotic cell cycle;positive regulation of ubiquitin-protein ligase activity involved in mitotic cell cycle;DNA damage response, signal transduction by p53 class mediator resulting in cell cycle arrest;proteasome binding;M/G1 transition of mitotic cell cycle;ubiquitin thiolesterase activity;antigen processing and presentation of …	biological_process;biological_process;biological_process;molecular_function;biological_process;molecular_function;biological_process;biological_process;biological_process;cellular_component;cellular_component;biological_process;biological_process;cellular_component;biological_process;molecular_function;biological_process;molecular_function;biological_process;biological_process;molecular_function;…	ko03050	Proteasome	Genetic Information Processing
ENSONIG00000004650 : ENSONIG00000004650 : ENSONIP00000005856.2	ENSONIG00000004650	463.253	yes	up	1	no	ENSONIP00000005856.2	1.08914	no	up	0.0104085	yes	GO:0006508;GO:0004252;GO:0005576	proteolysis;serine-type endopeptidase activity;extracellular region	biological_process;molecular_function;cellular_component	.	.	.
ENSONIG00000020126 : ENSONIG00000020126 : ENSONIP00000025354.2	ENSONIG00000020126	1.40501	no	up	9.20635e-06	yes	ENSONIP00000025354.2	0.866563	no	down	0.352656	no	GO:0005634;GO:0003676;GO:0007283;GO:0043046;GO:0034587;GO:0005524;GO:0009566;GO:0031047;GO:0071547;GO:0007140;GO:0008026;GO:0007275;GO:0030154	nucleus;nucleic acid binding;spermatogenesis;DNA methylation involved in gamete generation;piRNA metabolic process;ATP binding;fertilization;gene silencing by RNA;piP-body;male meiosis;ATP-dependent helicase activity;multicellular organismal development;cell differentiation	cellular_component;molecular_function;biological_process;biological_process;biological_process;molecular_function;biological_process;biological_process;cellular_component;biological_process;molecular_function;biological_process;biological_process	ko00230	Purine metabolism	Metabolism
ENSONIG00000019718 : ENSONIG00000019718 : ENSONIP00000064343.1	ENSONIG00000019718	0.999686	no	down	0.355426	no	ENSONIP00000064343.1	0.926782	no	down	0.525664	no	GO:0071818;GO:0006810;GO:0071816	BAT3 complex;transport;tail-anchored membrane protein insertion into ER membrane	cellular_component;biological_process;biological_process	.	.	.
ENSONIG00000005908 : ENSONIG00000005908 : ENSONIP00000054135.1	ENSONIG00000005908	0.821496	no	down	0.0155542	yes	ENSONIP00000054135.1	0.827849	yes	down	0.0263733	yes	GO:0046570;GO:0071267;GO:0006915;GO:0046872;GO:0005737	methylthioribulose 1-phosphate dehydratase activity;L-methionine salvage;apoptosis;metal ion binding;cytoplasm	molecular_function;biological_process;biological_process;molecular_function;cellular_component	ko00270	Cysteine and methionine metabolism	Metabolism
ENSONIG00000001619 : ENSONIG00000001619 : ENSONIP00000056468.1	ENSONIG00000001619	1.19054	no	up	1.93947e-05	yes	ENSONIP00000056468.1	0.975634	no	down	0.520455	no	GO:0033185;GO:0005515;GO:0019348;GO:0004582;GO:0006501;GO:0018279;GO:0035269;GO:0004169;GO:0005789;GO:0006506;GO:0006488	dolichol-phosphate-mannose synthase complex;protein binding;dolichol metabolic process;dolichyl-phosphate beta-D-mannosyltransferase activity;C-terminal protein lipidation;protein N-linked glycosylation via asparagine;protein O-linked mannosylation;dolichyl-phosphate-mannose-protein mannosyltransferase activity;endoplasmic reticulum membrane;GPI anchor biosynthetic process;dolichol-linked oligosa…	cellular_component;molecular_function;biological_process;molecular_function;biological_process;biological_process;biological_process;molecular_function;cellular_component;biological_process;biological_process	ko00510	N-Glycan biosynthesis	Metabolism
ENSONIG00000007781 : ENSONIG00000007781 : ENSONIP00000009801.2	ENSONIG00000007781	1	no	down	1	no	ENSONIP00000009801.2	1.12877	no	up	0.00641835	yes	GO:0007596;GO:0004867;GO:0030162;GO:0008201;GO:0005615	blood coagulation;serine-type endopeptidase inhibitor activity;regulation of proteolysis;heparin binding;extracellular space	biological_process;molecular_function;biological_process;molecular_function;cellular_component	ko04610	Complement and coagulation cascades	Organismal Systems
ENSONIG00000016188 : ENSONIG00000016188 : ENSONIP00000020386.2	ENSONIG00000016188	1.00008	no	up	0.591692	no	ENSONIP00000020386.2	1.05973	no	up	0.331121	no	GO:0001104;GO:0006357;GO:0016592	RNA polymerase II transcription cofactor activity;regulation of transcription from RNA polymerase II promoter;mediator complex	molecular_function;biological_process;cellular_component	.	.	.
ENSONIG00000016057 : ENSONIG00000016057 : ENSONIP00000020227.2	ENSONIG00000016057	1.05715	no	up	0.106331	no	ENSONIP00000020227.2	0.976936	no	down	0.650538	no	GO:0005801;GO:0033365;GO:0006486;GO:0050821;GO:0008565;GO:0005515;GO:0032580;GO:0006886;GO:0017119;GO:0006890;GO:0006888;GO:0006891	cis-Golgi network;protein localization to organelle;protein glycosylation;protein stabilization;protein transporter activity;protein binding;Golgi cisterna membrane;intracellular protein transport;Golgi transport complex;retrograde vesicle-mediated transport, Golgi to ER;ER to Golgi vesicle-mediated transport;intra-Golgi vesicle-mediated transport	cellular_component;biological_process;biological_process;biological_process;molecular_function;molecular_function;cellular_component;biological_process;cellular_component;biological_process;biological_process;biological_process	.	.	.
ENSONIG00000006802 : ENSONIG00000006802 : ENSONIP00000008584.2	ENSONIG00000006802	1.31634	no	up	6.56569e-10	yes	ENSONIP00000008584.2	1.03252	no	up	0.603624	no	GO:0004823;GO:0005759;GO:0006429;GO:0005524	leucine-tRNA ligase activity;mitochondrial matrix;leucyl-tRNA aminoacylation;ATP binding	molecular_function;cellular_component;biological_process;molecular_function	ko00290;ko00970	Valine, leucine and isoleucine biosynthesis;Aminoacyl-tRNA biosynthesis	Metabolism;Genetic Information Processing
[truncated: 3,697 more rows]
