# Supplementary material for: Transcriptional knockout of steroidogenic factor 1 in vivo in Oreochromis niloticus increased weight and suppressed gonad development using antisense RNA
Source: Research Square preprint supplement (doi:10.21203/rs.3.rs-138053/v1), 2021-01-04
Supplement: Supplementary file 6 [file 664a101925b22d5f6ed093b2.xlsx]

## Sheet: Sheet1
# Correlation	mRNA_Information						protein_Information						GO			KEGG
# mRNA : Gene : Protein	mRNA	FC(TM/CM)	Sig_FC	Regulation	pvalue	Sig_pvalue	protein	FC(TM/CM)	Sig_FC	Regulation	pvalue	Sig_pvalue	GO_list	GO_term	GO_class	KEGG_list	KEGG_term	KEGG_class
ENSONIG00000021087 : ENSONIG00000021087 : ENSONIP00000026389.1	ENSONIG00000021087	0.0358503	yes	down	6.07032e-17	yes	ENSONIP00000026389.1	0.777547	yes	down	0.00623208	yes	GO:0015020;GO:0005886;GO:0050896;GO:0007608;GO:0016021	glucuronosyltransferase activity;plasma membrane;response to stimulus;sensory perception of smell;integral to membrane	molecular_function;cellular_component;biological_process;biological_process;cellular_component	ko00860;ko00982;ko00983;ko00830;ko00980;ko00500;ko00053;ko00040;ko00140	Porphyrin and chlorophyll metabolism;Drug metabolism - cytochrome P450;Drug metabolism - other enzymes;Retinol metabolism;Metabolism of xenobiotics by cytochrome P450;Starch and sucrose metabolism;Ascorbate and aldarate metabolism;Pentose and glucuronate interconversions;Steroid hormone biosynthesis	Metabolism;Metabolism;Metabolism;Metabolism;Metabolism;Metabolism;Metabolism;Metabolism;Metabolism
ENSONIG00000016568 : ENSONIG00000016568 : ENSONIP00000020864.2	ENSONIG00000016568	0.461563	yes	down	0.0353309	yes	ENSONIP00000020864.2	0.763893	yes	down	0.0142494	yes	.	.	.	.	.	.
ENSONIG00000003887 : ENSONIG00000003887 : ENSONIP00000038822.1	ENSONIG00000003887	0.288341	yes	down	6.19149e-13	yes	ENSONIP00000038822.1	0.681805	yes	down	0.0152657	yes	GO:0008270;GO:0004181;GO:0006508;GO:0005615	zinc ion binding;metallocarboxypeptidase activity;proteolysis;extracellular space	molecular_function;molecular_function;biological_process;cellular_component	.	.	.
ENSONIG00000010955 : ENSONIG00000010955 : ENSONIP00000036912.1	ENSONIG00000010955	0.494902	yes	down	0.00590854	yes	ENSONIP00000036912.1	2.55661	yes	up	0.0281198	yes	GO:0016021;GO:0003823;GO:0005886	integral to membrane;antigen binding;plasma membrane	cellular_component;molecular_function;cellular_component	.	.	.
ENSONIG00000009460 : ENSONIG00000009460 : ENSONIP00000011887.2	ENSONIG00000009460	5.31493e-05	yes	down	2.45791e-07	yes	ENSONIP00000011887.2	0.411101	yes	down	4.8064e-05	yes	.	.	.	.	.	.
ENSONIG00000001911 : ENSONIG00000001911 : ENSONIP00000002392.1	ENSONIG00000001911	12.3329	yes	up	4.08381e-68	yes	ENSONIP00000002392.1	1.74052	yes	up	0.0119963	yes	GO:0009055;GO:0016021;GO:0006805;GO:0005789;GO:0006691;GO:0050051;GO:0020037;GO:0005792	electron carrier activity;integral to membrane;xenobiotic metabolic process;endoplasmic reticulum membrane;leukotriene metabolic process;leukotriene-B4 20-monooxygenase activity;heme binding;microsome	molecular_function;cellular_component;biological_process;cellular_component;biological_process;molecular_function;molecular_function;cellular_component	ko00590	Arachidonic acid metabolism	Metabolism
ENSONIG00000016999 : ENSONIG00000016999 : ENSONIP00000009992.2	ENSONIG00000016999	3.72671	yes	up	0.00010987	yes	ENSONIP00000009992.2	1.33736	yes	up	0.000456895	yes	GO:0004909;GO:0016021;GO:0045087;GO:0030728;GO:0071731	interleukin-1, Type I, activating receptor activity;integral to membrane;innate immune response;ovulation;response to nitric oxide	molecular_function;cellular_component;biological_process;biological_process;biological_process	ko04060;ko04010;ko04640;ko04210	Cytokine-cytokine receptor interaction;MAPK signaling pathway;Hematopoietic cell lineage;Apoptosis	Environmental Information Processing;Environmental Information Processing;Organismal Systems;Cellular Processes
ENSONIG00000012916 : ENSONIG00000012916 : ENSONIP00000040002.1	ENSONIG00000012916	0.41649	yes	down	3.43705e-11	yes	ENSONIP00000040002.1	0.671496	yes	down	8.41045e-05	yes	GO:0006096;GO:0050821;GO:0005634;GO:0051402;GO:0035605;GO:0051287;GO:0005829;GO:0004365;GO:0035606	glycolysis;protein stabilization;nucleus;neuron apoptosis;peptidyl-cysteine S-nitrosylase activity;NAD binding;cytosol;glyceraldehyde-3-phosphate dehydrogenase (NAD+) (phosphorylating) activity;peptidyl-cysteine S-trans-nitrosylation	biological_process;biological_process;cellular_component;biological_process;molecular_function;molecular_function;cellular_component;molecular_function;biological_process	ko00010;ko05010	Glycolysis / Gluconeogenesis;Alzheimer's disease	Metabolism;Human Diseases
ENSONIG00000017521 : ENSONIG00000017521 : ENSONIP00000057640.1	ENSONIG00000017521	0.454253	yes	down	0.00118151	yes	ENSONIP00000057640.1	0.75644	yes	down	0.00430576	yes	GO:0005515;GO:0010008;GO:0005903;GO:0045177;GO:0030251	protein binding;endosome membrane;brush border;apical part of cell;guanylate cyclase inhibitor activity	molecular_function;cellular_component;cellular_component;cellular_component;molecular_function	ko04530	Tight junction	Cellular Processes
ENSONIG00000004777 : ENSONIG00000004777 : ENSONIP00000049536.1	ENSONIG00000004777	0.374481	yes	down	3.48435e-08	yes	ENSONIP00000049536.1	0.673173	yes	down	0.00812811	yes	GO:0045121;GO:0005856;GO:0042470;GO:0051260;GO:0005887	membrane raft;cytoskeleton;melanosome;protein homooligomerization;integral to plasma membrane	cellular_component;cellular_component;cellular_component;biological_process;cellular_component	.	.	.
ENSONIG00000008194 : ENSONIG00000008194 : ENSONIP00000010316.1	ENSONIG00000008194	2.09181	yes	up	0.0331703	yes	ENSONIP00000010316.1	1.38434	yes	up	0.00665801	yes	GO:0000242;GO:0006882;GO:0042493;GO:0005886;GO:0006919;GO:0045121;GO:0042169;GO:0030217;GO:0050870;GO:0004715;GO:0005524;GO:0004722	pericentriolar material;cellular zinc ion homeostasis;response to drug;plasma membrane;activation of caspase activity;membrane raft;SH2 domain binding;T cell differentiation;positive regulation of T cell activation;non-membrane spanning protein tyrosine kinase activity;ATP binding;protein serine/threonine phosphatase activity	cellular_component;biological_process;biological_process;cellular_component;biological_process;cellular_component;molecular_function;biological_process;biological_process;molecular_function;molecular_function;molecular_function	ko05340;ko04650;ko04660	Primary immunodeficiency;Natural killer cell mediated cytotoxicity;T cell receptor signaling pathway	Human Diseases;Organismal Systems;Organismal Systems
ENSONIG00000009750 : ENSONIG00000009750 : ENSONIP00000036928.1	ENSONIG00000009750	3.47862	yes	up	6.5381e-12	yes	ENSONIP00000036928.1	1.73598	yes	up	0.0383614	yes	GO:0008207;GO:0006699;GO:0006707;GO:0005496;GO:0008209;GO:0007586;GO:0005829;GO:0030573;GO:0047787	C21-steroid hormone metabolic process;bile acid biosynthetic process;cholesterol catabolic process;steroid binding;androgen metabolic process;digestion;cytosol;bile acid catabolic process;delta4-3-oxosteroid 5beta-reductase activity	biological_process;biological_process;biological_process;molecular_function;biological_process;biological_process;cellular_component;biological_process;molecular_function	ko00120;ko00140	Primary bile acid biosynthesis;Steroid hormone biosynthesis	Metabolism;Metabolism
ENSONIG00000003718 : ENSONIG00000003718 : ENSONIP00000070622.1	ENSONIG00000003718	0.162008	yes	down	2.84729e-14	yes	ENSONIP00000070622.1	0.536098	yes	down	0.000651524	yes	GO:0005737;GO:0005886;GO:0004198	cytoplasm;plasma membrane;calcium-dependent cysteine-type endopeptidase activity	cellular_component;cellular_component;molecular_function	ko05010;ko04210	Alzheimer's disease;Apoptosis	Human Diseases;Cellular Processes
ENSONIG00000005663 : ENSONIG00000005663 : ENSONIP00000007130.1	ENSONIG00000005663	0.115321	yes	down	7.33692e-54	yes	ENSONIP00000007130.1	0.66021	yes	down	0.0425904	yes	GO:0005576;GO:0005634;GO:0005829;GO:0008219;GO:0031966;GO:0042583;GO:0005783	extracellular region;nucleus;cytosol;cell death;mitochondrial membrane;chromaffin granule;endoplasmic reticulum	cellular_component;cellular_component;cellular_component;biological_process;cellular_component;cellular_component;cellular_component	.	.	.
ENSONIG00000016574 : ENSONIG00000016574 : ENSONIP00000020873.2	ENSONIG00000016574	2.17366	yes	up	7.18379e-15	yes	ENSONIP00000020873.2	1.22095	yes	up	0.00259498	yes	GO:0005730;GO:0051731;GO:0005524;GO:0000460;GO:0003723	nucleolus;polynucleotide 5'-hydroxyl-kinase activity;ATP binding;maturation of 5.8S rRNA;RNA binding	cellular_component;molecular_function;molecular_function;biological_process;molecular_function	.	.	.
ENSONIG00000016179 : ENSONIG00000016179 : ENSONIP00000020375.1	ENSONIG00000016179	2.22232	yes	up	2.20235e-06	yes	ENSONIP00000020375.1	1.23668	yes	up	0.0393614	yes	GO:0016021;GO:0005739;GO:0008171	integral to membrane;mitochondrion;O-methyltransferase activity	cellular_component;cellular_component;molecular_function	ko00360;ko00941;ko00945;ko00940	Phenylalanine metabolism;Flavonoid biosynthesis;Stilbenoid, diarylheptanoid and gingerol biosynthesis;Phenylpropanoid biosynthesis	Metabolism;Metabolism;Metabolism;Metabolism
ENSONIG00000018100 : ENSONIG00000018100 : ENSONIP00000022803.1	ENSONIG00000018100	0.170676	yes	down	5.03904e-10	yes	ENSONIP00000022803.1	1.3207	yes	up	0.000299457	yes	GO:0046872;GO:0003676;GO:0004519;GO:0005576	metal ion binding;nucleic acid binding;endonuclease activity;extracellular region	molecular_function;molecular_function;molecular_function;cellular_component	ko04210	Apoptosis	Cellular Processes
ENSONIG00000003637 : ENSONIG00000003637 : ENSONIP00000054324.1	ENSONIG00000003637	3.69787	yes	up	1.52774e-16	yes	ENSONIP00000054324.1	1.79376	yes	up	5.32016e-06	yes	GO:0072593;GO:0005777;GO:0006874;GO:0017144;GO:0005925;GO:0019439;GO:0006805;GO:0009636;GO:0004301;GO:0045909;GO:0005730;GO:0005625;GO:0008217;GO:0046872;GO:0005794;GO:0042803;GO:0005829;GO:0006954	reactive oxygen species metabolic process;peroxisome;cellular calcium ion homeostasis;drug metabolic process;focal adhesion;aromatic compound catabolic process;xenobiotic metabolic process;response to toxin;epoxide hydrolase activity;positive regulation of vasodilation;nucleolus;soluble fraction;regulation of blood pressure;metal ion binding;Golgi apparatus;protein homodimerization activity;cytos…	biological_process;cellular_component;biological_process;biological_process;cellular_component;biological_process;biological_process;biological_process;molecular_function;biological_process;cellular_component;cellular_component;biological_process;molecular_function;cellular_component;molecular_function;cellular_component;biological_process	ko00590;ko04146;ko00625	Arachidonic acid metabolism;Peroxisome;Tetrachloroethene degradation	Metabolism;Cellular Processes;Metabolism
ENSONIG00000010088 : ENSONIG00000010088 : ENSONIP00000013755.2	ENSONIG00000010088	0.0384118	yes	down	3.05189e-18	yes	ENSONIP00000013755.2	0.82285	yes	down	0.00668168	yes	GO:0019054;GO:0005829;GO:0030683;GO:0005524;GO:0008601;GO:0004694;GO:0009615;GO:0033689;GO:0005515;GO:0019058;GO:0046777;GO:0003725	modulation by virus of host cellular process;cytosol;evasion by virus of host immune response;ATP binding;protein phosphatase type 2A regulator activity;eukaryotic translation initiation factor 2alpha kinase activity;response to virus;negative regulation of osteoblast proliferation;protein binding;viral infectious cycle;protein autophosphorylation;double-stranded RNA binding	biological_process;cellular_component;biological_process;molecular_function;molecular_function;molecular_function;biological_process;biological_process;molecular_function;biological_process;biological_process;molecular_function	.	.	.
ENSONIG00000003266 : ENSONIG00000003266 : ENSONIP00000004099.1	ENSONIG00000003266	3.14818	yes	up	1.3786e-07	yes	ENSONIP00000004099.1	1.56343	yes	up	0.0339607	yes	GO:0032094;GO:0007565;GO:0042493;GO:0008211;GO:0005792;GO:0051287;GO:0032868;GO:0003845;GO:0001666;GO:0051384;GO:0005783;GO:0002017;GO:0005496	response to food;female pregnancy;response to drug;glucocorticoid metabolic process;microsome;NAD binding;response to insulin stimulus;11-beta-hydroxysteroid dehydrogenase [NAD(P)] activity;response to hypoxia;response to glucocorticoid stimulus;endoplasmic reticulum;regulation of blood volume by renal aldosterone;steroid binding	biological_process;biological_process;biological_process;biological_process;cellular_component;molecular_function;biological_process;molecular_function;biological_process;biological_process;cellular_component;biological_process;molecular_function	ko00140;ko04960	Steroid hormone biosynthesis;Aldosterone-regulated sodium reabsorption	Metabolism;Organismal Systems
ENSONIG00000004507 : ENSONIG00000004507 : ENSONIP00000059845.1	ENSONIG00000004507	2.16926	yes	up	3.77511e-10	yes	ENSONIP00000059845.1	0.551992	yes	down	0.000478658	yes	GO:0005509;GO:0016021;GO:0005515;GO:0005886;GO:0007156	calcium ion binding;integral to membrane;protein binding;plasma membrane;homophilic cell adhesion	molecular_function;cellular_component;molecular_function;cellular_component;biological_process	ko05200;ko05100;ko05216;ko05213;ko04514;ko05219;ko05130;ko05218;ko04520	Pathways in cancer;Bacterial invasion of epithelial cells;Thyroid cancer;Endometrial cancer;Cell adhesion molecules (CAMs;Bladder cancer;Pathogenic Escherichia coli infection;Melanoma;Adherens junction	Human Diseases;Human Diseases;Human Diseases;Human Diseases;Environmental Information Processing;Human Diseases;Human Diseases;Human Diseases;Cellular Processes
ENSONIG00000010881 : ENSONIG00000010881 : ENSONIP00000030943.1	ENSONIG00000010881	0.284996	yes	down	1.80326e-05	yes	ENSONIP00000030943.1	0.776955	yes	down	0.0157859	yes	GO:0005794;GO:0016874;GO:0003779;GO:0005215;GO:0005524;GO:0030054	Golgi apparatus;ligase activity;actin binding;transporter activity;ATP binding;cell junction	cellular_component;molecular_function;molecular_function;molecular_function;molecular_function;cellular_component	ko05010	Alzheimer's disease	Human Diseases
ENSONIG00000016816 : ENSONIG00000016816 : ENSONIP00000050889.1	ENSONIG00000016816	0.429565	yes	down	0.0492961	yes	ENSONIP00000050889.1	1.37287	yes	up	0.0469495	yes	GO:0005737;GO:0004032;GO:0047006	cytoplasm;alditol:NADP+ 1-oxidoreductase activity;17-alpha,20-alpha-dihydroxypregn-4-en-3-one dehydrogenase activity	cellular_component;molecular_function;molecular_function	ko00051;ko00620;ko00040;ko00561;ko00052	Fructose and mannose metabolism;Pyruvate metabolism;Pentose and glucuronate interconversions;Glycerolipid metabolism;Galactose metabolism	Metabolism;Metabolism;Metabolism;Metabolism;Metabolism
ENSONIG00000012032 : ENSONIG00000012032 : ENSONIP00000015145.2	ENSONIG00000012032	0.351503	yes	down	7.03821e-07	yes	ENSONIP00000015145.2	0.695394	yes	down	8.23133e-05	yes	GO:0005886;GO:0007155;GO:0016021	plasma membrane;cell adhesion;integral to membrane	cellular_component;biological_process;cellular_component	ko04360;ko04514	Axon guidance;Cell adhesion molecules (CAMs	Organismal Systems;Environmental Information Processing
ENSONIG00000007923 : ENSONIG00000007923 : ENSONIP00000073716.1	ENSONIG00000007923	3.24211	yes	up	3.0341e-05	yes	ENSONIP00000073716.1	2.45622	yes	up	0.0102431	yes	.	.	.	.	.	.
ENSONIG00000000749 : ENSONIG00000000749 : ENSONIP00000000944.2	ENSONIG00000000749	9.06025	yes	up	1.07313e-17	yes	ENSONIP00000000944.2	1.27273	yes	up	0.0441899	yes	GO:0046872;GO:0005978;GO:0008466;GO:0005515;GO:0005980;GO:0006006;GO:0005829	metal ion binding;glycogen biosynthetic process;glycogenin glucosyltransferase activity;protein binding;glycogen catabolic process;glucose metabolic process;cytosol	molecular_function;biological_process;molecular_function;molecular_function;biological_process;biological_process;cellular_component	.	.	.
ENSONIG00000003388 : ENSONIG00000003388 : ENSONIP00000004266.2	ENSONIG00000003388	0.0221572	yes	down	6.2624e-17	yes	ENSONIP00000004266.2	0.503132	yes	down	8.35263e-07	yes	GO:0016021;GO:0031324;GO:0050710;GO:0046007	integral to membrane;negative regulation of cellular metabolic process;negative regulation of cytokine secretion;negative regulation of activated T cell proliferation	cellular_component;biological_process;biological_process;biological_process	.	.	.
ENSONIG00000008894 : ENSONIG00000008894 : ENSONIP00000074941.1	ENSONIG00000008894	70.9463	yes	up	5.57053e-06	yes	ENSONIP00000074941.1	0.554404	yes	down	0.00150341	yes	GO:0005581;GO:0043129;GO:0005615;GO:0005537;GO:0007585;GO:0048286	collagen;surfactant homeostasis;extracellular space;mannose binding;respiratory gaseous exchange;lung alveolus development	cellular_component;biological_process;cellular_component;molecular_function;biological_process;biological_process	ko05222;ko05200;ko04145;ko04510;ko04512	Small cell lung cancer;Pathways in cancer;Phagosome;Focal adhesion;ECM-receptor interaction	Human Diseases;Human Diseases;Cellular Processes;Cellular Processes;Environmental Information Processing
ENSONIG00000008821 : ENSONIG00000008821 : ENSONIP00000011093.2	ENSONIG00000008821	0.428132	yes	down	1.35948e-06	yes	ENSONIP00000011093.2	0.780944	yes	down	0.00415582	yes	GO:0046581;GO:0005887;GO:0008554;GO:0005524;GO:0015432;GO:0016324;GO:0005624;GO:0006699;GO:0015126;GO:0000139	intercellular canaliculus;integral to plasma membrane;sodium-exporting ATPase activity, phosphorylative mechanism;ATP binding;bile acid-exporting ATPase activity;apical plasma membrane;membrane fraction;bile acid biosynthetic process;canalicular bile acid transmembrane transporter activity;Golgi membrane	cellular_component;cellular_component;molecular_function;molecular_function;molecular_function;cellular_component;cellular_component;biological_process;molecular_function;cellular_component	ko02010	ABC transporters	Environmental Information Processing
ENSONIG00000008413 : ENSONIG00000008413 : ENSONIP00000015736.2	ENSONIG00000008413	0.0615288	yes	down	6.2705e-10	yes	ENSONIP00000015736.2	0.384402	yes	down	0.00044846	yes	GO:0006955;GO:0002474;GO:0042612;GO:0016021	immune response;antigen processing and presentation of peptide antigen via MHC class I;MHC class I protein complex;integral to membrane	biological_process;biological_process;cellular_component;cellular_component	ko04940;ko04144;ko04514;ko04612;ko05320;ko05416;ko05332;ko04650;ko05330;ko04145	Type I diabetes mellitus;Endocytosis;Cell adhesion molecules (CAMs;Antigen processing and presentation;Autoimmune thyroid disease;Viral myocarditis;Graft-versus-host disease;Natural killer cell mediated cytotoxicity;Allograft rejection;Phagosome	Human Diseases;Cellular Processes;Environmental Information Processing;Organismal Systems;Human Diseases;Human Diseases;Human Diseases;Organismal Systems;Human Diseases;Cellular Processes
ENSONIG00000010019 : ENSONIG00000010019 : ENSONIP00000072154.1	ENSONIG00000010019	9.18028	yes	up	1.42328e-09	yes	ENSONIP00000072154.1	1.90465	yes	up	0.0208009	yes	.	.	.	ko04142	Lysosome	Cellular Processes
ENSONIG00000004142 : ENSONIG00000004142 : ENSONIP00000042437.1	ENSONIG00000004142	0.395977	yes	down	0.0391406	yes	ENSONIP00000042437.1	0.24533	yes	down	0.000118212	yes	GO:0005576	extracellular region	cellular_component	ko04514	Cell adhesion molecules (CAMs	Environmental Information Processing
ENSONIG00000020048 : ENSONIG00000020048 : ENSONIP00000025252.1	ENSONIG00000020048	0.162103	yes	down	5.62318e-12	yes	ENSONIP00000025252.1	0.720183	yes	down	0.00158145	yes	GO:0005737;GO:0051603;GO:0005839;GO:0005634;GO:0004298	cytoplasm;proteolysis involved in cellular protein catabolic process;proteasome core complex;nucleus;threonine-type endopeptidase activity	cellular_component;biological_process;cellular_component;cellular_component;molecular_function	ko03050	Proteasome	Genetic Information Processing
ENSONIG00000005228 : ENSONIG00000005228 : ENSONIP00000047257.1	ENSONIG00000005228	0.327732	yes	down	3.99128e-16	yes	ENSONIP00000047257.1	0.66159	yes	down	0.00154422	yes	GO:0006953;GO:0007596;GO:0007155;GO:0005507;GO:0005615;GO:0016491	acute-phase response;blood coagulation;cell adhesion;copper ion binding;extracellular space;oxidoreductase activity	biological_process;biological_process;biological_process;molecular_function;cellular_component;molecular_function	ko04610	Complement and coagulation cascades	Organismal Systems
ENSONIG00000005661 : ENSONIG00000005661 : ENSONIP00000007126.1	ENSONIG00000005661	0.486373	yes	down	0.0227286	yes	ENSONIP00000007126.1	0.804211	yes	down	0.0131514	yes	GO:0005737;GO:0030036;GO:0051015;GO:0016020;GO:0015629	cytoplasm;actin cytoskeleton organization;actin filament binding;membrane;actin cytoskeleton	cellular_component;biological_process;molecular_function;cellular_component;cellular_component	.	.	.
ENSONIG00000016974 : ENSONIG00000016974 : ENSONIP00000011469.2	ENSONIG00000016974	2.5562	yes	up	1.25866e-08	yes	ENSONIP00000011469.2	0.285898	yes	down	3.64323e-05	yes	.	.	.	.	.	.
ENSONIG00000001336 : ENSONIG00000001336 : ENSONIP00000001687.1	ENSONIG00000001336	0.369843	yes	down	2.9831e-14	yes	ENSONIP00000001687.1	0.765	yes	down	0.000483156	yes	GO:0016020	membrane	cellular_component	.	.	.
ENSONIG00000014333 : ENSONIG00000014333 : ENSONIP00000039887.1	ENSONIG00000014333	0.201698	yes	down	9.48899e-06	yes	ENSONIP00000039887.1	0.734605	yes	down	0.00517453	yes	GO:0030054;GO:0046983;GO:0016874;GO:0030672;GO:0048786;GO:0005524;GO:0003779;GO:0007269;GO:0005794;GO:0000795	cell junction;protein dimerization activity;ligase activity;synaptic vesicle membrane;presynaptic active zone;ATP binding;actin binding;neurotransmitter secretion;Golgi apparatus;synaptonemal complex	cellular_component;molecular_function;molecular_function;cellular_component;cellular_component;molecular_function;molecular_function;biological_process;cellular_component;cellular_component	ko04520;ko05131;ko04810;ko04666;ko05100	Adherens junction;Shigellosis;Regulation of actin cytoskeleton;Fc gamma R-mediated phagocytosis;Bacterial invasion of epithelial cells	Cellular Processes;Human Diseases;Cellular Processes;Organismal Systems;Human Diseases
ENSONIG00000010226 : ENSONIG00000010226 : ENSONIP00000012855.1	ENSONIG00000010226	0.483008	yes	down	3.36946e-05	yes	ENSONIP00000012855.1	0.758499	yes	down	7.57251e-05	yes	GO:0003924;GO:0005525;GO:0005737;GO:0003746	GTPase activity;GTP binding;cytoplasm;translation elongation factor activity	molecular_function;molecular_function;cellular_component;molecular_function	.	.	.
ENSONIG00000004101 : ENSONIG00000004101 : ENSONIP00000005168.2	ENSONIG00000004101	0.47698	yes	down	0.0228489	yes	ENSONIP00000005168.2	0.830131	yes	down	0.0182395	yes	GO:0051927;GO:0004435;GO:0005813;GO:0051301;GO:0030496;GO:0005085;GO:0007049;GO:0007193;GO:0001664;GO:0005834;GO:0005525;GO:0007584;GO:0007214;GO:0003924;GO:0046872;GO:0031683;GO:0004871;GO:0030168;GO:0007268;GO:0001973	negative regulation of calcium ion transport via voltage-gated calcium channel activity;phosphatidylinositol phospholipase C activity;centrosome;cell division;midbody;guanyl-nucleotide exchange factor activity;cell cycle;inhibition of adenylate cyclase activity by G-protein signaling pathway;G-protein-coupled receptor binding;heterotrimeric G-protein complex;GTP binding;response to nutrient;gamma…	biological_process;molecular_function;cellular_component;biological_process;cellular_component;molecular_function;biological_process;biological_process;molecular_function;cellular_component;molecular_function;biological_process;biological_process;molecular_function;molecular_function;molecular_function;molecular_function;biological_process;biological_process;biological_process	ko05142;ko04670;ko04730;ko04360;ko04062;ko04914;ko04916;ko04540;ko04530	Chagas disease;Leukocyte transendothelial migration;Long-term depression;Axon guidance;Chemokine signaling pathway;Progesterone-mediated oocyte maturation;Melanogenesis;Gap junction;Tight junction	Human Diseases;Organismal Systems;Organismal Systems;Organismal Systems;Organismal Systems;Organismal Systems;Organismal Systems;Cellular Processes;Cellular Processes
ENSONIG00000013697 : ENSONIG00000013697 : ENSONIP00000017235.2	ENSONIG00000013697	2.00632	yes	up	2.34386e-09	yes	ENSONIP00000017235.2	0.601708	yes	down	0.0210192	yes	GO:0031225;GO:0007605;GO:0005578;GO:0005886;GO:0007160	anchored to membrane;sensory perception of sound;proteinaceous extracellular matrix;plasma membrane;cell-matrix adhesion	cellular_component;biological_process;cellular_component;cellular_component;biological_process	.	.	.
ENSONIG00000008152 : ENSONIG00000008152 : ENSONIP00000007896.2	ENSONIG00000008152	0.382032	yes	down	0.0012134	yes	ENSONIP00000007896.2	0.667593	yes	down	0.000375637	yes	GO:0072669	tRNA-splicing ligase complex	cellular_component	.	.	.
ENSONIG00000016122 : ENSONIG00000016122 : ENSONIP00000020307.1	ENSONIG00000016122	8.00897	yes	up	3.51581e-18	yes	ENSONIP00000020307.1	2.02572	yes	up	0.0217532	yes	GO:0006694;GO:0015485;GO:0005739;GO:0017127	steroid biosynthetic process;cholesterol binding;mitochondrion;cholesterol transporter activity	biological_process;molecular_function;cellular_component;molecular_function	.	.	.
ENSONIG00000013081 : ENSONIG00000013081 : ENSONIP00000016453.2	ENSONIG00000013081	0.228849	yes	down	9.79597e-28	yes	ENSONIP00000016453.2	0.551733	yes	down	0.0031996	yes	GO:0046872;GO:0006754;GO:0005783;GO:0016021;GO:0005794;GO:0005524;GO:0005391;GO:0005886	metal ion binding;ATP biosynthetic process;endoplasmic reticulum;integral to membrane;Golgi apparatus;ATP binding;sodium:potassium-exchanging ATPase activity;plasma membrane	molecular_function;biological_process;cellular_component;cellular_component;cellular_component;molecular_function;molecular_function;cellular_component	ko04964;ko04260;ko04960	Proximal tubule bicarbonate reclamation;Cardiac muscle contraction;Aldosterone-regulated sodium reabsorption	Organismal Systems;Organismal Systems;Organismal Systems
ENSONIG00000018919 : ENSONIG00000018919 : ENSONIP00000023825.2	ENSONIG00000018919	0.492828	yes	down	0.0102782	yes	ENSONIP00000023825.2	0.808863	yes	down	0.0471059	yes	GO:0006886;GO:0016020;GO:0005769;GO:0005829	intracellular protein transport;membrane;early endosome;cytosol	biological_process;cellular_component;cellular_component;cellular_component	ko04142	Lysosome	Cellular Processes
ENSONIG00000019137 : ENSONIG00000019137 : ENSONIP00000024087.2	ENSONIG00000019137	0.0877832	yes	down	7.69098e-12	yes	ENSONIP00000024087.2	0.681143	yes	down	0.0126695	yes	.	.	.	.	.	.
ENSONIG00000018922 : ENSONIG00000018922 : ENSONIP00000077216.1	ENSONIG00000018922	0.445897	yes	down	1.82094e-06	yes	ENSONIP00000077216.1	0.733603	yes	down	0.00150128	yes	GO:0007155;GO:0005198	cell adhesion;structural molecule activity	biological_process;molecular_function	.	.	.
ENSONIG00000018548 : ENSONIG00000018548 : ENSONIP00000023352.2	ENSONIG00000018548	0.475186	yes	down	4.09238e-08	yes	ENSONIP00000023352.2	0.783061	yes	down	0.0449784	yes	GO:0005643;GO:0055085;GO:0031965;GO:0015031;GO:0051028	nuclear pore;transmembrane transport;nuclear membrane;protein transport;mRNA transport	cellular_component;biological_process;cellular_component;biological_process;biological_process	.	.	.
ENSONIG00000009182 : ENSONIG00000009182 : ENSONIP00000011542.2	ENSONIG00000009182	0.238111	yes	down	0.000261949	yes	ENSONIP00000011542.2	0.781473	yes	down	0.00578245	yes	GO:0005886;GO:0009986;GO:0004888;GO:0010008;GO:0005537;GO:0006898;GO:0016021	plasma membrane;cell surface;transmembrane signaling receptor activity;endosome membrane;mannose binding;receptor-mediated endocytosis;integral to membrane	cellular_component;cellular_component;molecular_function;cellular_component;molecular_function;biological_process;cellular_component	ko04145	Phagosome	Cellular Processes
ENSONIG00000005382 : ENSONIG00000005382 : ENSONIP00000006767.2	ENSONIG00000005382	4.65111	yes	up	3.96902e-11	yes	ENSONIP00000006767.2	0.699915	yes	down	0.00880134	yes	GO:0016021	integral to membrane	cellular_component	.	.	.
ENSONIG00000001929 : ENSONIG00000001929 : ENSONIP00000002417.2	ENSONIG00000001929	12.7257	yes	up	2.33156e-51	yes	ENSONIP00000002417.2	1.46549	yes	up	0.00403356	yes	GO:0050051;GO:0020037;GO:0016021;GO:0009055;GO:0005792;GO:0005789	leukotriene-B4 20-monooxygenase activity;heme binding;integral to membrane;electron carrier activity;microsome;endoplasmic reticulum membrane	molecular_function;molecular_function;cellular_component;molecular_function;cellular_component;cellular_component	ko00590	Arachidonic acid metabolism	Metabolism
ENSONIG00000018123 : ENSONIG00000018123 : ENSONIP00000022830.2	ENSONIG00000018123	0.438427	yes	down	1.37237e-08	yes	ENSONIP00000022830.2	0.720677	yes	down	0.0108448	yes	GO:0031047;GO:0000166;GO:0003723;GO:0006417	gene silencing by RNA;nucleotide binding;RNA binding;regulation of translation	biological_process;molecular_function;molecular_function;biological_process	ko04510;ko04512	Focal adhesion;ECM-receptor interaction	Cellular Processes;Environmental Information Processing
